# Supplementary material
Source: publisher site journal article supplement (https://www.dovepress.com/article/618140)
Supplement: Supplementary file 1 [file 618140_supplementary_material_1.docx]

# **Supplementary Material**

**Paper**: Thematic Evolution in Medical Education Research (2000-2024): A Large-Scale BERTopic Analysis

**Journal**: Advances in Medical Education and Practice (AMEP)

This document consolidates all supplementary materials referenced in the main manuscript: 16 supplementary tables (Table S1 to Table S16) followed by 4 supplementary figures (Figure S1 to Figure S4), each with its full caption.

## **Table of Contents**

- **Supplementary Table S1.** Database search queries and corpus deduplication protocol (four labeled sub-tables: S1a pre-specified search window and filters; S1b database-specific search queries and raw retrieval; S1c cross-database deduplication and filtering; S1d per-source raw retrieval counts)
- **Supplementary Table S2.** Database distribution of the final 276,253-document corpus
- **Supplementary Table S3.** Partial 2025 records sensitivity for the auxiliary ITS analysis
- **Supplementary Table S4.** Poisson GLM residual autocorrelation diagnostics (Durbin-Watson, ACF lags 1-3, Ljung-Box p) motivating the primary Newey-West HAC specification, with HC1 and HAC standard errors and p-values per topic
- **Supplementary Table S5.** Full 39-topic keywords (top-10 c-TF-IDF) and top-5 representative titles per topic
- **Supplementary Table S6.** Topic label confidence heuristic (lexical overlap between human-assigned label and top-5 representative titles)
- **Supplementary Table S7.** Per-event interrupted time series (ITS) coefficients for individual policy and technology reference periods
- **Supplementary Table S8.** Compound event ITS coefficients with within-pool FDR correction
- **Supplementary Table S9.** Aggregate quality indices for the BERTopic versus LDA comparison (topic diversity, perplexity, outlier and low-confidence assignment proportions; descriptive only — the indices are not commensurable across model families)
- **Supplementary Table S10.** Trend re-classification with Topic 0 excluded from the model pool and offset denominator, under the primary Newey-West HAC specification (no substantive classification changed)
- **Supplementary Table S11.** Full 39-row Poisson GLM effect sizes: beta, Newey-West HAC standard errors and FDR-adjusted p-values (primary), HC1 standard errors and FDR-adjusted p-values (sensitivity), incidence rate ratios with 95% CI, and trend classifications under both specifications
- **Supplementary Table S12.** S-curve lifecycle fits per topic (logistic parameters and lifecycle stage classification)
- **Supplementary Table S13.** Outlier reassignment threshold sensitivity (cosine similarity 0.3 to 0.7)
- **Supplementary Table S14.** Robustness summary including quadrant-threshold sensitivity for the embedding-based positional map
- **Supplementary Table S15.** Strategic migration (co-movement centrality and global density) by 8-year period
- **Supplementary Table S16.** ITS event-level summary (Hot/Cold/Stable transitions across reference periods)
- **Supplementary Figure S1.** Qualitative comparison of six representative BERTopic themes with their best-matching LDA counterparts, selected by token-level Jaccard overlap of the top-10 terms (overlap 0.14-0.25).
- **Supplementary Figure S2.** Logistic S-curve lifecycle fits of normalized cumulative topic proportions for representative topics.
- **Supplementary Figure S3.** Time-varying co-movement positional diagrams for three periods (2000-2008, 2009-2016, 2017-2024).
- **Supplementary Figure S4.** Hierarchical clustering of the 39 BERTopic topic centroids using Ward linkage on Euclidean distance in the 384-dimensional embedding space.

## **Supplementary Table S1. Database search queries and corpus deduplication protocol (four labeled sub-tables: S1a pre-specified search window and filters; S1b database-specific search queries and raw retrieval; S1c cross-database deduplication and filtering; S1d per-source raw retrieval counts)**

### **Table S1a. Pre-specified search window and filters**

| Parameter | Value |
| --- | --- |
| Year range (search) | 2000-2025 inclusive (analysis restricted to 2000-2024 in primary results; 2025 used in sensitivity analysis only) |
| Language at search time | None (all languages retrieved); English-only filter applied during preprocessing |
| Document types at search time | All types retrieved (article, review, editorial, letter, book chapter, conference paper, etc.) |
| Document types in final corpus | All types retained provided the abstract field is populated and contains at least 50 words after text cleaning |

### **Table S1b. Database-specific search queries and raw retrieval**

| Database (search field) | Search query (copy-paste ready) | Retrieval mechanism | Raw records |
| --- | --- | --- | --- |
| PubMed (MeSH + Title/Abstract) | ("Education, Medical"[MeSH] OR "Education, Medical, Undergraduate"[MeSH] OR "Education, Medical, Graduate"[MeSH] OR "Education, Medical, Continuing"[MeSH] OR "Teaching"[MeSH] OR "Curriculum"[MeSH] OR "Internship and Residency"[MeSH] OR "Simulation Training"[MeSH] OR "Students, Medical"[MeSH] OR "Clinical Competence"[MeSH] OR "Problem-Based Learning"[MeSH] OR "Computer-Assisted Instruction"[MeSH] OR "medical education"[TIAB] OR "clinical teaching"[TIAB] OR "medical teaching"[TIAB] OR "undergraduate medical education"[TIAB] OR "graduate medical education"[TIAB] OR "continuing medical education"[TIAB] OR "health professions education"[TIAB] OR "medical curriculum"[TIAB] OR "medical training"[TIAB] OR "residency training"[TIAB] OR "clinical clerkship"[TIAB] OR "OSCE"[TIAB] OR "objective structured clinical examination"[TIAB] OR "simulation-based"[TIAB] OR "medical students"[TIAB] OR "clinical skills"[TIAB]) AND ("2000"[PDAT] : "2025"[PDAT]) | NCBI E-utilities API (esearch.fcgi for IDs, efetch.fcgi for records; db=pubmed, retmode=xml), paginated in 10,000-record windows | 313,990 |
| Web of Science Core Collection (TS = Topic) | TS=("medical education" OR "medical teaching" OR "clinical teaching" OR "undergraduate medical education" OR "graduate medical education" OR "continuing medical education" OR "health professions education" OR "medical curriculum" OR "medical training") AND PY=(2000-2025) | Web of Science portal export (session-driven export in plain-text and tab-delimited format, batched in 1,000-record windows); indexes searched: SCI-EXPANDED, SSCI, A&HCI, ESCI | 76,633 |
| Scopus (TITLE-ABS-KEY) | TITLE-ABS-KEY("medical education" OR "medical teaching" OR "clinical teaching" OR "undergraduate medical education" OR "graduate medical education" OR "continuing medical education" OR "health professions education" OR "medical curriculum" OR "medical training") AND PUBYEAR > 1999 AND PUBYEAR < 2026 | Scopus portal export (year-by-year batched CSV export; portal limits each export to 20,000 records) | 277,824 |
| OpenAlex - topic filter (REST API) | filter=topics.id:T10254|T12602,publication_year:2000-2025 with per-page=200 and cursor=* (T10254 = OpenAlex topic “Medical Education”; T12602 = “Clinical Teaching and Learning”; the “|” character is the OpenAlex OR operator within a filter clause) | OpenAlex REST API (asynchronous httpx with mailto polite-pool header; cursor-based deep pagination) | included in merged total below |
| OpenAlex - free-text complement (REST API) | search="medical education" filter=publication_year:2000-2025 per-page=200 cursor=* (queries the title + abstract + concepts inverted index; recall-oriented) | OpenAlex REST API (asynchronous httpx with mailto polite-pool header; cursor-based deep pagination) | included in merged total below |
| OpenAlex - merged (intra-source dedup) | Topic-based and free-text passes merged by OpenAlex Work ID; duplicates between the two passes removed before cross-database deduplication | – | 275,478 |

### **Table S1c. Cross-database deduplication and filtering**

| Step | Operation | Records remaining |
| --- | --- | --- |
| Raw retrieval (sum across 4 sources) | – | 943,925 |
| (a) DOI exact match (case-folded, leading “doi:” stripped, trailing punctuation stripped) | Drop duplicates | – |
| (b) PMID exact match for records without DOI | Drop duplicates | – |
| (c) Title + first author + year fuzzy match (Jaccard ≥ 0.90 on character 3-grams of normalized title; identical first-author surname; identical year) | Drop duplicates | – |
| Cumulative duplicates removed (steps a-c combined) | – | 321,518 |
| Unique records after cross-database dedup | – | 622,407 |
| Drop non-English (language flag from PubMed/WoS/Scopus; OpenAlex language field) | – | 340,346 |
| Drop records with no abstract field | – | 283,857 |
| Drop records with abstract length < 50 words after cleaning (HTML tags, structured section labels, URLs, email addresses, Unicode artifacts) | – | 276,253 |
| Final analytical corpus (English, abstract ≥ 50 words, year 2000-2024) | – | 276,253 |

### **Table S1d. Per-source raw retrieval counts**

| Source | Raw records retrieved |
| --- | --- |
| OpenAlex (topic + free-text, intra-source deduplicated) | 275,478 |
| PubMed | 313,990 |
| Web of Science Core Collection | 76,633 |
| Scopus | 277,824 |
| Sum (before cross-source dedup) | 943,925 |
| Cross-source duplicates removed | 321,518 (34.1%) |
| Unique records after dedup | 622,407 |

**Notes for Table S1.** Searches were conducted between January 15 and February 20, 2026. No language filter was applied at search time; the English-only filter was applied during preprocessing because the all-MiniLM-L6-v2 embedding model is trained predominantly on English text. No document-type filter was applied at search time; the corpus retains all document types provided an abstract of at least 50 words is available. Education-specific databases were not included; notably, ERIC (Education Resources Information Center) was excluded, so pedagogy-focused medical education research published primarily in education journals may be under-represented relative to its true share of the field. Each query in Table S1b can be copy-pasted directly into the corresponding database portal or API; the database-specific retrieval scripts and the deduplication script are available from the corresponding author upon reasonable request.

## **Supplementary Table S2. Database distribution of the final 276,253-document corpus**

| Source | Records present | Pct of corpus |
| --- | --- | --- |
| OpenAlex | 113938 | 44.3 |
| PubMed | 177360 | 68.9 |
| Web of Science | 36352 | 14.1 |
| Scopus | 79711 | 31.0 |
|  |  |  |
| Source combination | Records | Pct of corpus |
| PubMed only | 87760 | 34.1 |
| OpenAlex only | 74732 | 29.0 |
| PubMed + Scopus | 32329 | 12.6 |
| PubMed + WoS + Scopus | 21472 | 8.3 |
| OpenAlex + PubMed | 11757 | 4.6 |
| OpenAlex + PubMed + Scopus | 10646 | 4.1 |
| OpenAlex + PubMed + WoS + Scopus | 10213 | 4.0 |
| OpenAlex + Scopus | 3644 | 1.4 |
| PubMed + WoS | 1663 | 0.6 |
| OpenAlex + PubMed + WoS | 970 | 0.4 |
| OpenAlex + WoS + Scopus | 837 | 0.3 |
| OpenAlex + WoS | 777 | 0.3 |
| Other 3-source combinations | ~439 | ~0.2 |
|  |  |  |
| Number of sources per record | Records | Pct of corpus |
| 1 source | 162492 | 63.1 |
| 2 sources | 50176 | 19.5 |
| 3 sources | 34327 | 13.3 |
| 4 sources | 10384 | 4.0 |
|  |  |  |
| Notes |  |  |
| Percentages computed on the strict 2000-2024 English-only abstract≥50 word subset (n=257,379) of the merged corpus; the full Paper 4 analytical corpus (n=276,253) additionally includes a small set of partial-2025 records used only in sensitivity analyses. |  |  |
| Records present counts: a record contributes to ALL databases that indexed it; row sums therefore exceed n because of cross-source overlap. |  |  |
| Source combination counts: each record belongs to exactly ONE combination row; this rows sums to n. |  |  |
| PubMed coverage (68.9%) reflects the biomedical centre of medical education; OpenAlex coverage (44.3%) reflects its broad multidisciplinary index; WoS coverage (14.1%) is comparatively narrow because WoS retrieval used only the TS field with a smaller keyword set. |  |  |

## **Supplementary Table S3. Partial 2025 records sensitivity for the auxiliary ITS analysis**

| event_year | event_name | topic_id | model_type | beta_level_change | beta_slope_change | p_level_change | p_slope_change | p_level_fdr | p_slope_fdr |
| --- | --- | --- | --- | --- | --- | --- | --- | --- | --- |
| 2003 | WFME Global Standards | 0 | Poisson-HC1 | 0.39947476992953934 | 0.13678560558223013 | 6.719886358432428e-14 | 8.640902195855206e-18 | 8.990744507144077e-13 | 1.67633502599591e-16 |
| 2003 | WFME Global Standards | 1 | Poisson-HC1 | 0.016502363882804818 | -0.20691715052772292 | 0.7175048368038777 | 6.903418084510765e-70 | 0.7965349944850058 | 4.4642103613169614e-68 |
| 2003 | WFME Global Standards | 2 | Poisson-HC1 | -0.34551776996984207 | 0.06124967312024824 | 0.0065702986757786765 | 0.12499937959471981 | 0.01593297428876329 | 0.20208233034479703 |
| 2003 | WFME Global Standards | 3 | Poisson-HC1 | 0.042723812809582484 | -0.07691991541479483 | 0.5771523295920489 | 0.013221663401882806 | 0.6745528938605098 | 0.029482789654773155 |
| 2003 | WFME Global Standards | 4 | Poisson-HC1 | 0.16606832117661988 | -0.01591656030494141 | 1.3065748076179113e-05 | 0.14574363064024481 | 6.582294505672352e-05 | 0.2265573242907611 |
| 2003 | WFME Global Standards | 5 | Poisson-HC1 | 0.2004398477454205 | 0.05509435266555602 | 0.0037127205867618046 | 0.04307075245398519 | 0.009633569802497098 | 0.08151927781534757 |
| 2003 | WFME Global Standards | 6 | Poisson-HC1 | 0.08861868625875566 | -0.0470574251294597 | 0.08644832503935314 | 1.2859145551615079e-05 | 0.15041233235546647 | 6.564932202666646e-05 |
| 2003 | WFME Global Standards | 7 | Poisson-HC1 | -0.3899401633728145 | -0.15327065393868602 | 1.2752004226541638e-16 | 1.3827642956524979e-49 | 2.356084590427693e-15 | 5.961250519035213e-48 |
| 2003 | WFME Global Standards | 8 | Poisson-HC1 | 0.07648033337813338 | -0.04235527445830811 | 0.3310189475711901 | 0.14597765740384092 | 0.4444129815142621 | 0.2265573242907611 |
| 2003 | WFME Global Standards | 9 | Poisson-HC1 | -0.13560633919830972 | 0.07539223500499423 | 0.025392780389972194 | 2.0045648086373103e-16 | 0.05240637654951708 | 3.535323389778529e-15 |
| 2003 | WFME Global Standards | 10 | Poisson-HC1 | -0.06454424314896076 | -0.1812190613692302 | 0.3505861567137216 | 7.424235451754474e-131 | 0.46584735892097257 | 9.60201118426912e-129 |
| 2003 | WFME Global Standards | 11 | Poisson-HC1 | 0.09588234673851767 | -0.006927360821564548 | 0.2885265310121443 | 0.8566739016955665 | 0.3955770107162968 | 0.8959285009646355 |
| 2003 | WFME Global Standards | 12 | Poisson-HC1 | -0.34626141718297665 | 0.07616576799204611 | 0.0010446078209809958 | 1.0865116974799196e-05 | 0.0031177525733894337 | 5.6968451165163355e-05 |
| 2003 | WFME Global Standards | 13 | Poisson | 0.41390187725309474 | 0.24654257738045376 | 0.01362372150828585 | 0.0008038185555094247 | 0.030099977364730388 | 0.002455760626280762 |
| 2003 | WFME Global Standards | 14 | Poisson-HC1 | 0.7073163727188682 | 0.3178511646084997 | 1.034707866157238e-09 | 2.1817366399955177e-16 | 8.921481157089075e-09 | 3.680494853557656e-15 |
| 2003 | WFME Global Standards | 15 | Poisson-HC1 | 0.05183054090941522 | 0.1434477140244216 | 0.39847659566805005 | 2.23045750570606e-28 | 0.5136508940837323 | 6.1815536586710815e-27 |
| 2003 | WFME Global Standards | 16 | Poisson-HC1 | -0.6989351689646465 | 0.17875421542122202 | 0.04232737529048401 | 1.672847565406345e-05 | 0.08050500790543037 | 7.54726576020537e-05 |
| 2003 | WFME Global Standards | 17 | Poisson-HC1 | -0.38216965388272933 | -0.10046734036300563 | 0.00013307703062241262 | 0.02379936130200855 | 0.0004825596998270663 | 0.049380492968873355 |
| 2003 | WFME Global Standards | 18 | Poisson-HC1 | -0.0697914624275188 | -0.11632199138465432 | 0.07549540447603426 | 7.083597578897194e-110 | 0.13314644062136952 | 5.496871721224222e-108 |
| 2003 | WFME Global Standards | 19 | Poisson-HC1 | 0.01096840086032316 | -0.10778388520072354 | 0.946710530585158 | 0.1514898352655077 | 0.9615803294948725 | 0.23232433234394065 |
| 2003 | WFME Global Standards | 20 | Poisson-HC1 | 0.042607300601626805 | 0.04760096323894563 | 0.571293971114615 | 0.03036747933720762 | 0.6717032145226383 | 0.06104964757946402 |
| 2003 | WFME Global Standards | 21 | Poisson-HC1 | -0.17581739465126286 | 0.05469283997014 | 0.09471178614631125 | 0.05003793593707872 | 0.16047237128719985 | 0.09333999588262762 |
| 2003 | WFME Global Standards | 22 | Poisson-HC1 | -0.04908875216840903 | -0.07930677243049587 | 0.4178229731067685 | 1.4717952049940065e-07 | 0.5263484206669682 | 1.0981856529570665e-06 |
| 2003 | WFME Global Standards | 23 | Poisson-HC1 | 0.12591419036719065 | -0.07072280551461992 | 0.005904437554002153 | 1.883969284485437e-36 | 0.014591858413712328 | 6.645273476184996e-35 |
| 2003 | WFME Global Standards | 24 | Poisson-HC1 | -0.26971003930595533 | -0.08153919713124219 | 5.358819957116511e-10 | 1.4967416841849258e-119 | 4.8354003333981544e-09 | 1.451839433659378e-117 |
| 2003 | WFME Global Standards | 25 | Poisson-HC1 | -0.7955240532286617 | -0.12779487922541577 | 1.4025766943218417e-12 | 0.013760530165241987 | 1.7006242418652332e-11 | 0.030099977364730388 |
| 2003 | WFME Global Standards | 26 | Poisson | 0.14319260414104323 | -0.2573971449109008 | 0.5617491641089877 | 0.036215673300866676 | 0.6645081575435586 | 0.07061146352128779 |
| 2003 | WFME Global Standards | 27 | Poisson-HC1 | -0.4994717398547567 | -0.48926521196722744 | 0.028131193617135262 | 0.0006153094783924306 | 0.057146089651562725 | 0.0019253232065827668 |
| 2003 | WFME Global Standards | 28 | Poisson-HC1 | 0.35521268873289824 | 0.15764660525190569 | 2.5242418790566616e-10 | 8.927515336122573e-211 | 2.448514622684962e-09 | 1.7319379752077792e-208 |
| 2003 | WFME Global Standards | 29 | Poisson-HC1 | -0.5219131278553282 | -0.24223477094548354 | 1.6357714035454837e-05 | 7.216018106534755e-06 | 7.466815347948796e-05 | 3.9997357504792646e-05 |
| 2003 | WFME Global Standards | 30 | Poisson-HC1 | 0.050281726445407036 | 0.08661890405928861 | 0.7139131380032789 | 0.080513437777894 | 0.7965349944850058 | 0.14135390885892704 |
| 2003 | WFME Global Standards | 31 | Poisson | -0.44493237822546833 | 0.044754133453200555 | 0.1294613362710954 | 0.7385795096318759 | 0.20671192787318937 | 0.8164354693366606 |
| 2003 | WFME Global Standards | 32 | Poisson-HC1 | 0.6012570262876767 | -0.18790411123906858 | 7.672182218249719e-05 | 0.00808798954299529 | 0.0003037557857837644 | 0.01937123421408748 |
| 2003 | WFME Global Standards | 33 | Poisson | -0.2768540253051257 | -0.23774767174860922 | 0.3200262212635192 | 0.07480302905827464 | 0.4326486893736775 | 0.1329812753991188 |
| 2003 | WFME Global Standards | 34 | Poisson-HC1 | -1.3601556515330913 | -0.32248964084589693 | 0.0020294233750290684 | 0.07505901884640984 | 0.005430457031112266 | 0.1329812753991188 |
| 2003 | WFME Global Standards | 35 | Poisson | -0.0064626976839190975 | 0.09983531196666169 | 0.989051103473685 | 0.6336891190513099 | 0.9916067910795601 | 0.7274301129938113 |
| 2003 | WFME Global Standards | 36 | Poisson-HC1 | 0.22604592039043517 | -0.12501706312176247 | 0.38413181853065403 | 0.19370957062971095 | 0.5052310019996399 | 0.281218418769384 |
| 2003 | WFME Global Standards | 37 | Poisson | 0.203884340070493 | -0.04928666984801747 | 0.7181789851426622 | 0.8499989694356773 | 0.7965349944850058 | 0.8953040566027571 |
| 2003 | WFME Global Standards | 38 | Poisson-HC1 | -17.33890272019799 | -19.72995668661138 |  |  |  |  |
| 2013 | CBME Milestones (ACGME) | 0 | Poisson-HC1 | -0.058602941930621 | -0.03318487770409173 | 0.1573399958216053 | 7.084082644194924e-05 | 0.23846843116712052 | 0.00028336330576779695 |
| 2013 | CBME Milestones (ACGME) | 1 | Poisson-HC1 | -0.012765725816704687 | -0.05488419135262603 | 0.8323180545414257 | 2.343042047724223e-06 | 0.8799438832754037 | 1.4662908298661268e-05 |
| 2013 | CBME Milestones (ACGME) | 2 | Poisson-HC1 | 0.02175475033924509 | 0.08235674619531853 | 0.8206926388736488 | 1.4183208397802822e-05 | 0.8743806215128102 | 6.84848461980117e-05 |
| 2013 | CBME Milestones (ACGME) | 3 | Poisson-HC1 | -0.010146581314309564 | -0.04136118822359458 | 0.8225487805468445 | 9.22586368202232e-10 | 0.8743806215128102 | 8.135534337783319e-09 |
| 2013 | CBME Milestones (ACGME) | 4 | Poisson-HC1 | 0.12952690890677798 | -0.034322656542139646 | 0.009021930743395046 | 1.616409984799553e-05 | 0.021344567856324867 | 7.466274691693173e-05 |
| 2013 | CBME Milestones (ACGME) | 5 | Poisson-HC1 | 0.014689010140534673 | -0.019128709717697943 | 0.7568581645480642 | 0.0323019812157459 | 0.8310099633281087 | 0.06427266006004825 |
| 2013 | CBME Milestones (ACGME) | 6 | Poisson-HC1 | -0.060760520382666834 | -0.041343120646494216 | 0.3182980883750842 | 3.6987440108568435e-08 | 0.43201841459563 | 2.870225352424911e-07 |
| 2013 | CBME Milestones (ACGME) | 7 | Poisson-HC1 | -0.026316025276214912 | -0.008371404509454323 | 0.6081603311528745 | 0.3863366269639138 | 0.7064856541536386 | 0.5060324912430622 |
| 2013 | CBME Milestones (ACGME) | 8 | Poisson-HC1 | -0.09534586392457906 | -0.03061698832276927 | 0.10235830172669416 | 0.0010751688399558128 | 0.17192649813834343 | 0.0031844695412431706 |
| 2013 | CBME Milestones (ACGME) | 9 | Poisson-HC1 | 0.031844650244195506 | 0.05866039728471161 | 0.5032547928148607 | 2.742588876850646e-13 | 0.6121092777810846 | 3.5470816140601684e-12 |
| 2013 | CBME Milestones (ACGME) | 10 | Poisson-HC1 | 0.13864848134502022 | -0.0717374445335646 | 0.00492289092616256 | 2.5392162250495115e-19 | 0.012566326837836008 | 5.47342164066228e-18 |
| 2013 | CBME Milestones (ACGME) | 11 | Poisson | -0.140280691342344 | -0.025262850316775082 | 0.0002939936904903926 | 1.3293382216612464e-05 | 0.001000610104476073 | 6.582294505672352e-05 |
| 2013 | CBME Milestones (ACGME) | 12 | Poisson-HC1 | 0.067205123897299 | 0.09325168330727365 | 0.4050940823714544 | 2.7033341954396584e-10 | 0.5170279735530404 | 2.558277238611189e-09 |
| 2013 | CBME Milestones (ACGME) | 13 | Poisson | 0.06564743729800465 | 0.015537491726923595 | 0.1765669275406947 | 0.02988035943874609 | 0.260486569907945 | 0.06038322636579939 |
| 2013 | CBME Milestones (ACGME) | 14 | Poisson-HC1 | -0.21041702590637532 | 0.017996106459770362 | 0.03175189127391186 | 0.19424365007782196 | 0.06350378254782373 | 0.281218418769384 |
| 2013 | CBME Milestones (ACGME) | 15 | Poisson-HC1 | 0.30101150774074453 | 0.0034433068079570655 | 0.00039768208791908977 | 0.7610495649567395 | 0.0012969862777333142 | 0.8310099633281087 |
| 2013 | CBME Milestones (ACGME) | 16 | Poisson-HC1 | -0.5614363904071189 | 0.17964469894557672 | 0.0277195391675389 | 3.258471697583862e-06 | 0.0566062168263426 | 1.945056951788521e-05 |
| 2013 | CBME Milestones (ACGME) | 17 | Poisson | 0.03517090016537205 | 0.03575160031296359 | 0.5924481729601101 | 0.00011899522974427313 | 0.690299973298867 | 0.0004571301895126532 |
| 2013 | CBME Milestones (ACGME) | 18 | Poisson-HC1 | -0.06744414671579309 | -0.017878250351217338 | 0.3718156900798134 | 0.09541957760571979 | 0.49237026536166417 | 0.16096867874356208 |
| 2013 | CBME Milestones (ACGME) | 19 | Poisson-HC1 | 0.06348653856945001 | -0.05132401908373392 | 0.4683315337017838 | 0.000909864473983881 | 0.5824122919111927 | 0.0027366466349282624 |
| 2013 | CBME Milestones (ACGME) | 20 | Poisson | -0.03121059508228505 | 0.043086887323212676 | 0.6547402856360054 | 1.3402094483198861e-05 | 0.7471742083140297 | 6.582294505672352e-05 |
| 2013 | CBME Milestones (ACGME) | 21 | Poisson-HC1 | 0.023839236610145805 | 0.06546150708181299 | 0.6927479357690753 | 1.59063669228183e-10 | 0.7836332334647267 | 1.6241237805403949e-09 |
| 2013 | CBME Milestones (ACGME) | 22 | Poisson | 0.16286475541210094 | -0.03446915902612224 | 0.0006133050841543464 | 1.4419577732464846e-06 | 0.0019253232065827668 | 9.611413544080912e-06 |
| 2013 | CBME Milestones (ACGME) | 23 | Poisson-HC1 | 0.025879667586354956 | -0.04155078419041901 | 0.7040093986225158 | 4.459341904494585e-05 | 0.7940571123998144 | 0.00018406645307913818 |
| 2013 | CBME Milestones (ACGME) | 24 | Poisson | 0.22123266876931882 | 0.007084506524264417 | 0.0013071886634478651 | 0.47759686875065765 | 0.0037569570475390495 | 0.5896180985686762 |
| 2013 | CBME Milestones (ACGME) | 25 | Poisson-HC1 | -0.07599201630765509 | 0.0623629944984897 | 0.4590766986070366 | 5.298601577677024e-06 | 0.5727387751110296 | 3.023319723733361e-05 |
| 2013 | CBME Milestones (ACGME) | 26 | Poisson-HC1 | -0.01500772658157489 | -0.03295238829194677 | 0.8939557844902928 | 0.10330391694179711 | 0.9285580544721478 | 0.17202540675286387 |
| 2013 | CBME Milestones (ACGME) | 27 | Poisson-HC1 | -0.2051099827228596 | 0.023666749228667485 | 0.37967565132080683 | 0.44900472539748126 | 0.5010685466410648 | 0.5619801079168475 |
| 2013 | CBME Milestones (ACGME) | 28 | Poisson-HC1 | 0.09231835764602786 | -0.004010614629173614 | 0.3873496131422408 | 0.763954579366284 | 0.5060324912430622 | 0.8310099633281087 |
| 2013 | CBME Milestones (ACGME) | 29 | Poisson | 0.22554389537742212 | -0.03708482495990199 | 0.05214193696849894 | 0.05182552089047883 | 0.09542958275366788 | 0.09530000997870042 |
| 2013 | CBME Milestones (ACGME) | 30 | Poisson-HC1 | 0.08905336370669124 | 0.02089766439498843 | 0.38892463192614835 | 0.09347439140658571 | 0.5063850912327031 | 0.15907045555155813 |
| 2013 | CBME Milestones (ACGME) | 31 | Poisson | 0.21127434872132694 | 0.05788600914600873 | 0.07146517443556615 | 0.0003977870284800629 | 0.12837262815277622 | 0.0012969862777333142 |
| 2013 | CBME Milestones (ACGME) | 32 | Poisson-HC1 | -0.1337819149410084 | -0.09344889373259302 | 0.14934458864286496 | 1.4615293791257055e-06 | 0.23085936411725738 | 9.611413544080912e-06 |
| 2013 | CBME Milestones (ACGME) | 33 | Poisson | -0.11632224576006067 | -0.014407587735192072 | 0.41530681162339733 | 0.5031046188601027 | 0.5248828759279419 | 0.6121092777810846 |
| 2013 | CBME Milestones (ACGME) | 34 | Poisson-HC1 | -0.3737505062666931 | 0.22891131864413228 | 0.1612514777873325 | 3.5533484374994566e-10 | 0.24250222240885666 | 3.2826171279756883e-09 |
| 2013 | CBME Milestones (ACGME) | 35 | Poisson | 0.2150413691965196 | 0.06536431024527756 | 0.28154826367101726 | 0.017019205116913756 | 0.38875703311158255 | 0.03648315793017976 |
| 2013 | CBME Milestones (ACGME) | 36 | Poisson-HC1 | 0.43649862780843734 | -0.06286627409202881 | 0.12859609727853755 | 0.15439721999044018 | 0.20617886671104366 | 0.23492596610310112 |
| 2013 | CBME Milestones (ACGME) | 37 | Poisson | 0.06700451774341355 | -0.0005216066186939202 | 0.7708382241037933 | 0.9875723418537248 | 0.8354336060119324 | 0.9916067910795601 |
| 2013 | CBME Milestones (ACGME) | 38 | Poisson-HC1 | -0.6129624726192967 | -0.431828287113664 | 0.046167557763874455 | 2.763493087235453e-07 | 0.08691561652164995 | 1.9495187597224654e-06 |
| 2020 | COVID-19 Pandemic | 0 | Poisson-HC1 | -0.14661172871255787 | 0.013795290392996033 | 0.013663510932687365 | 0.3917611016964262 | 0.030099977364730388 | 0.5083722657465329 |
| 2020 | COVID-19 Pandemic | 1 | Poisson-HC1 | -0.3182764254481098 | 0.0005320006258360955 | 1.1926180241165442e-05 | 0.9864941602986897 | 6.169810578096255e-05 | 0.9916067910795601 |
| 2020 | COVID-19 Pandemic | 2 | Poisson-HC1 | 0.7887766335839315 | -0.08087480454215648 | 9.787376544730306e-11 | 0.05780807972434699 | 1.0263519187446915e-09 | 0.10481091090208706 |
| 2020 | COVID-19 Pandemic | 3 | Poisson-HC1 | -0.21611765793064516 | -0.01296480587319694 | 8.57448371302582e-13 | 0.11768184768748409 | 1.073193445372264e-11 | 0.19347693602857555 |
| 2020 | COVID-19 Pandemic | 4 | Poisson | -0.22497640474662778 | -0.02071299188699323 | 2.2567013468263392e-10 | 0.09272461656631524 | 2.245128519406717e-09 | 0.15848965298559609 |
| 2020 | COVID-19 Pandemic | 5 | Poisson | -0.25392202197504027 | 0.048477751356691995 | 4.168563583465029e-12 | 0.00012615052606843505 | 4.9012202132861555e-11 | 0.00047063850110146924 |
| 2020 | COVID-19 Pandemic | 6 | Poisson-HC1 | -0.12009786038051594 | -0.030910915004458455 | 0.00018642200687442545 | 1.1318899756262772e-06 | 0.0006603028424291318 | 7.704794921806939e-06 |
| 2020 | COVID-19 Pandemic | 7 | Poisson-HC1 | -0.07589865619511602 | 0.027481179294931306 | 0.17247560638491743 | 0.04636992943294211 | 0.25640051830401517 | 0.08691561652164995 |
| 2020 | COVID-19 Pandemic | 8 | Poisson-HC1 | -0.21476661737047725 | 0.00383778884545866 | 0.00023501465245711692 | 0.8972890498578572 | 0.0008214926590392916 | 0.9285580544721478 |
| 2020 | COVID-19 Pandemic | 9 | Poisson-HC1 | 0.2648864227175049 | -0.025494054577411975 | 0.0014037341237128724 | 0.017214354338237686 | 0.003965050597340824 | 0.036698733424374845 |
| 2020 | COVID-19 Pandemic | 10 | Poisson-HC1 | -0.2635670216635876 | -0.06382934035079783 | 2.2068623908343986e-11 | 1.3416508866333839e-15 | 2.518419434246314e-10 | 2.1690022667239704e-14 |
| 2020 | COVID-19 Pandemic | 11 | Poisson-HC1 | -0.06989780791559087 | 0.001928913983657539 | 0.11878166373643022 | 0.877904283062695 | 0.19446112037862837 | 0.9156636070653915 |
| 2020 | COVID-19 Pandemic | 12 | Poisson-HC1 | 0.3968776841030984 | 0.012082622711016884 | 0.0003018786658464605 | 0.7584979587137215 | 0.0010185123682471884 | 0.8310099633281087 |
| 2020 | COVID-19 Pandemic | 13 | Poisson | 0.1287922478157628 | -0.018900862168821118 | 0.0013601099598955064 | 0.14498439210234282 | 0.003880313709113651 | 0.2265573242907611 |
| 2020 | COVID-19 Pandemic | 14 | Poisson-HC1 | 0.08951962713469669 | 0.05066798131396771 | 0.19185305007551168 | 4.831312282245459e-06 | 0.27984580236578394 | 2.797834575389908e-05 |
| 2020 | COVID-19 Pandemic | 15 | Poisson-HC1 | -0.09991858647779224 | -0.02125117752232294 | 0.02643495658256327 | 0.08336444598931204 | 0.054268588116584915 | 0.14570002272005889 |
| 2020 | COVID-19 Pandemic | 16 | Poisson-HC1 | -0.3580717532164924 | 0.4369332011803133 | 0.01246720579074533 | 5.477106558289692e-46 | 0.02812369678377435 | 2.1251173446164007e-44 |
| 2020 | COVID-19 Pandemic | 17 | Poisson | -0.09679482902527557 | 0.07492461035293443 | 0.1357001063819956 | 0.0004660947570878859 | 0.21490465827026242 | 0.0015070397145841644 |
| 2020 | COVID-19 Pandemic | 18 | Poisson-HC1 | -0.11932845563051427 | 0.02905724403367289 | 0.009372300643463232 | 3.655386958994157e-05 | 0.021906341263034545 | 0.00015416197174888404 |
| 2020 | COVID-19 Pandemic | 19 | Poisson-HC1 | 0.11331541884924544 | -0.13370361811477216 | 0.01928899219284228 | 4.770288312498833e-18 | 0.04067272637055923 | 9.74143086973446e-17 |
| 2020 | COVID-19 Pandemic | 20 | Poisson-HC1 | 0.07744603291791519 | 0.03946502006341719 | 0.27238837747310307 | 0.00033825223438703554 | 0.37745246592701426 | 0.0011217253584800838 |
| 2020 | COVID-19 Pandemic | 21 | Poisson-HC1 | 0.044598757933639356 | 0.08890438376861962 | 0.5501636056440704 | 0.0002503657904673353 | 0.6547959478217771 | 0.0008673386312618403 |
| 2020 | COVID-19 Pandemic | 22 | Poisson-HC1 | -0.1092326418202742 | -0.045184032774842155 | 0.0014911882278206472 | 0.007555776262589493 | 0.004132721659960079 | 0.018208951489967224 |
| 2020 | COVID-19 Pandemic | 23 | Poisson | -0.14992123172113425 | -0.06648481441793805 | 0.050417371567722524 | 0.01939292365606561 | 0.09359779984821215 | 0.04067272637055923 |
| 2020 | COVID-19 Pandemic | 24 | Poisson | -0.07797019345601351 | -0.030196359318643586 | 0.20598542658747032 | 0.1506526501875832 | 0.2949164041178542 | 0.23195725505072332 |
| 2020 | COVID-19 Pandemic | 25 | Poisson-HC1 | 0.33034008963259714 | 0.03405910319674657 | 9.18717579559895e-05 | 0.12751181962322622 | 0.00036006305138307 | 0.20528873864652186 |
| 2020 | COVID-19 Pandemic | 26 | Poisson-HC1 | -0.19357986818276274 | -0.020213922132785306 | 0.2253051431721792 | 0.7136369872218776 | 0.3178850747302019 | 0.7965349944850058 |
| 2020 | COVID-19 Pandemic | 27 | Poisson-HC1 | 0.20334219650001556 | -0.025167963973368093 | 0.10295678727549999 | 0.5150123889639053 | 0.17202540675286387 | 0.6222342983298148 |
| 2020 | COVID-19 Pandemic | 28 | Poisson | 5.320849353676338e-05 | -0.07091538422567098 | 0.9994680079661343 | 0.010966518041665135 | 0.9994680079661343 | 0.02502946470685925 |
| 2020 | COVID-19 Pandemic | 29 | Poisson | -0.22348482536100495 | -0.03668078842410237 | 0.006376421784993495 | 0.15373176219099324 | 0.01561367405891515 | 0.23483434539411566 |
| 2020 | COVID-19 Pandemic | 30 | Poisson-HC1 | 0.002036485966152432 | -0.046124740904398075 | 0.9812460132769588 | 0.0005107637583022945 | 0.9914673259152604 | 0.0016243962149286087 |
| 2020 | COVID-19 Pandemic | 31 | Poisson | 0.1134813710282597 | 0.0615464032644279 | 0.26566552013709244 | 0.05608737007148876 | 0.369455992161978 | 0.10216854266543492 |
| 2020 | COVID-19 Pandemic | 32 | Poisson-HC1 | -0.24394219069520384 | -0.055731349551173044 | 0.009286731244815221 | 0.03995461250688109 | 0.02183788923023216 | 0.07636645149098455 |
| 2020 | COVID-19 Pandemic | 33 | Poisson | -0.15595795908509327 | 0.007720056267704444 | 0.402932269938858 | 0.9136285378779014 | 0.5159660750372175 | 0.9402861344738084 |
| 2020 | COVID-19 Pandemic | 34 | Poisson-HC1 | 0.3539334715357594 | 0.2968390990317176 | 0.05113851502018867 | 2.4860009544937915e-15 | 0.09448449441825336 | 3.8582734813743646e-14 |
| 2020 | COVID-19 Pandemic | 35 | Poisson | 0.19153602988286594 | 0.019541582107647035 | 0.3184465633359541 | 0.7646148373921 | 0.43201841459563 | 0.8310099633281087 |
| 2020 | COVID-19 Pandemic | 36 | Poisson-HC1 | 0.13378660193628134 | -0.39135916800440557 | 0.5163903197479391 | 7.918668735954767e-11 | 0.6222342983298148 | 8.534565193195693e-10 |
| 2020 | COVID-19 Pandemic | 37 | Poisson | -0.2823795858427912 | 0.08034861254249442 | 0.30587008579830877 | 0.40721375786944036 | 0.41787884961177396 | 0.5180293050929274 |
| 2020 | COVID-19 Pandemic | 38 | Poisson-HC1 | -0.06201585763339808 | -1.2491478110403773 | 0.8514618476454056 | 0.012629420894740086 | 0.8953040566027571 | 0.028324943972018228 |
| 2021 | USMLE Step 1 Pass/Fail | 0 | Poisson-HC1 | -0.1730933394130484 | 0.045303088512959444 | 2.4978843313295384e-06 | 0.0037243182226148574 | 1.5383795564378744e-05 | 0.009633569802497098 |
| 2021 | USMLE Step 1 Pass/Fail | 1 | Poisson-HC1 | -0.35055302144296113 | 0.0487759638418141 | 1.4297094180512753e-05 | 0.13868784128551664 | 6.84848461980117e-05 | 0.21874342446658723 |
| 2021 | USMLE Step 1 Pass/Fail | 2 | Poisson-HC1 | 0.673998007676963 | -0.1857632375508053 | 1.469853717798835e-05 | 1.7175206003086717e-31 | 6.954917591535952e-05 | 5.1261384070751126e-30 |
| 2021 | USMLE Step 1 Pass/Fail | 3 | Poisson-HC1 | -0.20316418341639378 | 0.002791102945630187 | 7.870979843233504e-06 | 0.7418314577305448 | 4.301324196020563e-05 | 0.8177005840893505 |
| 2021 | USMLE Step 1 Pass/Fail | 4 | Poisson-HC1 | -0.23751186315784742 | 0.0017637211428231908 | 3.933616028681729e-05 | 0.9458304160191976 | 0.00016411215259446352 | 0.9615803294948725 |
| 2021 | USMLE Step 1 Pass/Fail | 5 | Poisson-HC1 | -0.16139097186864254 | 0.05609240426844193 | 0.0012368416514429432 | 0.0014102499547243136 | 0.0035895082018042724 | 0.003965050597340824 |
| 2021 | USMLE Step 1 Pass/Fail | 6 | Poisson-HC1 | -0.14888979483245515 | -0.01729860165399238 | 9.30040186895182e-05 | 0.06855911392353806 | 0.0003608555925153307 | 0.12372528466201285 |
| 2021 | USMLE Step 1 Pass/Fail | 7 | Poisson-HC1 | -0.06795096398000629 | 0.04318773353870592 | 0.19630865228280547 | 0.0024748751746226203 | 0.28315151332984584 | 0.0065770655325587445 |
| 2021 | USMLE Step 1 Pass/Fail | 8 | Poisson-HC1 | -0.2576607603177092 | 0.04434957026089127 | 1.9962182284270863e-08 | 0.08957955100279558 | 1.580678923734101e-07 | 0.15516457941555664 |
| 2021 | USMLE Step 1 Pass/Fail | 9 | Poisson-HC1 | 0.20333035755831944 | -0.047714413348865684 | 0.0055367882243097695 | 1.883760489237453e-14 | 0.014041005431582945 | 2.7070335919412287e-13 |
| 2021 | USMLE Step 1 Pass/Fail | 10 | Poisson-HC1 | -0.27937699721817855 | -0.04880226149434938 | 7.467348279527733e-07 | 4.2147185127289335e-08 | 5.173805593672787e-06 | 3.2064917312526005e-07 |
| 2021 | USMLE Step 1 Pass/Fail | 11 | Poisson-HC1 | -0.10486075620685219 | 0.02392543022099344 | 0.0001288692744755907 | 0.0739849919302224 | 0.0004762026523478971 | 0.13228652934989074 |
| 2021 | USMLE Step 1 Pass/Fail | 12 | Poisson-HC1 | 0.4148083456988985 | -0.041822957814591735 | 0.00012239892125021814 | 0.32975812399805127 | 0.000464239346520594 | 0.4442574726084857 |
| 2021 | USMLE Step 1 Pass/Fail | 13 | Poisson | 0.1425229359906338 | -0.04704578658672708 | 0.0004738903680000383 | 0.008585666265414174 | 0.001519582337057974 | 0.020437046079636194 |
| 2021 | USMLE Step 1 Pass/Fail | 14 | Poisson-HC1 | 0.16009220049440695 | 0.0331423226014131 | 0.010198081171897438 | 0.01879442108709903 | 0.023413346122462757 | 0.03984828077483292 |
| 2021 | USMLE Step 1 Pass/Fail | 15 | Poisson-HC1 | -0.05270920924338016 | -0.03552096789417899 | 0.23647479626266532 | 5.70779554111974e-05 | 0.33239778987676616 | 0.0002306900697869228 |
| 2021 | USMLE Step 1 Pass/Fail | 16 | Poisson-HC1 | 0.033594805725309144 | 0.47950037434347237 | 0.8148803542205549 | 2.1383892992951194e-32 | 0.871001590737122 | 6.914125401054219e-31 |
| 2021 | USMLE Step 1 Pass/Fail | 17 | Poisson | -0.019146971873839628 | 0.08377007800335293 | 0.7762891692452769 | 0.004667326536434842 | 0.8389977650896029 | 0.011992865537329263 |
| 2021 | USMLE Step 1 Pass/Fail | 18 | Poisson-HC1 | -0.0878662613892351 | 0.03982580015088783 | 0.03542263830221196 | 1.4900931636978175e-06 | 0.06976641452415351 | 9.635935791912552e-06 |
| 2021 | USMLE Step 1 Pass/Fail | 19 | Poisson-HC1 | -0.026815758836369424 | -0.1476931716772608 | 0.7185238352313197 | 2.202365257764266e-07 | 0.7965349944850058 | 1.6122975849293117e-06 |
| 2021 | USMLE Step 1 Pass/Fail | 20 | Poisson-HC1 | 0.0413880100853062 | 0.058048431937262945 | 0.478684796518384 | 5.570576106201984e-11 | 0.5896180985686762 | 6.1753815120182e-10 |
| 2021 | USMLE Step 1 Pass/Fail | 21 | Poisson-HC1 | 0.09946685458509862 | 0.09624953251591267 | 0.22144958653245883 | 0.011799245137559878 | 0.3135855458926789 | 0.02677255621855692 |
| 2021 | USMLE Step 1 Pass/Fail | 22 | Poisson-HC1 | -0.13289913638728143 | -0.040261498462984 | 0.0016207922403868738 | 0.10620780445976025 | 0.004460052406170972 | 0.17610524842045716 |
| 2021 | USMLE Step 1 Pass/Fail | 23 | Poisson | -0.37635378915508655 | 0.016886116107228805 | 1.5963436728788556e-05 | 0.6834432662245136 | 7.462425844301156e-05 | 0.7753683839038341 |
| 2021 | USMLE Step 1 Pass/Fail | 24 | Poisson | -0.09940637279406653 | -0.02412491560801291 | 0.12476728710033802 | 0.4130281451157831 | 0.20208233034479703 | 0.5237088898853721 |
| 2021 | USMLE Step 1 Pass/Fail | 25 | Poisson-HC1 | 0.36607494224523 | -0.010571856007331794 | 1.7180765901837993e-06 | 0.5374493030094953 | 1.0928093721169085e-05 | 0.6416317832851821 |
| 2021 | USMLE Step 1 Pass/Fail | 26 | Poisson-HC1 | -0.4240798995731551 | 0.08559440267168435 | 8.598488089689181e-06 | 0.005618869019331043 | 4.5701553134238386e-05 | 0.014156631035717175 |
| 2021 | USMLE Step 1 Pass/Fail | 27 | Poisson-HC1 | 0.270052097355253 | -0.08447177147079342 | 0.0011247557770839838 | 0.001239675512994259 | 0.0033061003144589825 | 0.0035895082018042724 |
| 2021 | USMLE Step 1 Pass/Fail | 28 | Poisson | -0.11816419472225934 | -0.05238636369183225 | 0.16602114236538879 | 0.18626649567830078 | 0.24871120941224267 | 0.2727222653704932 |
| 2021 | USMLE Step 1 Pass/Fail | 29 | Poisson | -0.31893314202887046 | 0.015181968007557197 | 0.00017382311487056933 | 0.6689436060478501 | 0.0006244756349053787 | 0.7611440444180816 |
| 2021 | USMLE Step 1 Pass/Fail | 30 | Poisson-HC1 | -0.08682498321143443 | -0.03002197371002299 | 0.21524333182065947 | 0.03961158648820165 | 0.30703828215594076 | 0.07608562157139723 |
| 2021 | USMLE Step 1 Pass/Fail | 31 | Poisson | 0.3047216027692334 | 0.0035877308129205416 | 0.0025773829874591067 | 0.9343631514418725 | 0.006802888429483901 | 0.956551194615954 |
| 2021 | USMLE Step 1 Pass/Fail | 32 | Poisson-HC1 | -0.28491296678052724 | -0.03568241125001897 | 0.0019323639845667724 | 0.28398896587320077 | 0.00520664740286047 | 0.39073659134326916 |
| 2021 | USMLE Step 1 Pass/Fail | 33 | Poisson | -0.1267614311117527 | 0.011370131855818321 | 0.5336058208318543 | 0.9109911825416711 | 0.6390094397616032 | 0.9400653692185329 |
| 2021 | USMLE Step 1 Pass/Fail | 34 | Poisson-HC1 | 0.5170946295450873 | 0.2964218695571509 | 0.00955278808465505 | 2.540990590212568e-06 | 0.02219450165776143 | 1.5404755453163693e-05 |
| 2021 | USMLE Step 1 Pass/Fail | 35 | Poisson | 0.04469133714524369 | 0.06250557692605258 | 0.8289763986736032 | 0.5009540052374014 | 0.8788055811075356 | 0.6121092777810846 |
| 2021 | USMLE Step 1 Pass/Fail | 36 | Poisson-HC1 | -0.630839787508842 | -0.2254661148167621 | 0.00013118287364087268 | 1.7388913256048213e-08 | 0.0004801788204967793 | 1.4351656095517655e-07 |
| 2021 | USMLE Step 1 Pass/Fail | 37 | Poisson | -0.03636979449493815 | 0.03742756012145108 | 0.8974465732656067 | 0.7789410272389987 | 0.9285580544721478 | 0.8395253293575875 |
| 2021 | USMLE Step 1 Pass/Fail | 38 | Poisson-HC1 | -3.847547199752411 | 0.34864317806656975 | 2.608689247026102e-50 | 3.486705796520409e-05 | 1.2652142848076596e-48 | 0.00014866393945603504 |
| 2022 | ChatGPT Release | 0 | Poisson-HC1 | -0.046459915497481186 | 0.020998713393296304 | 0.3395773641389901 | 0.22108841725388773 | 0.4543310940894074 | 0.3135855458926789 |
| 2022 | ChatGPT Release | 1 | Poisson-HC1 | -0.3450425124491727 | 0.1267329450521339 | 6.335267597342836e-06 | 2.4518325710497744e-07 | 3.562440330100029e-05 | 1.761687106606134e-06 |
| 2022 | ChatGPT Release | 2 | Poisson-HC1 | 0.31349007744805046 | -0.23496517303673667 | 0.0902732838600199 | 2.866373787515887e-53 | 0.15567126283416763 | 1.5887900422230918e-51 |
| 2022 | ChatGPT Release | 3 | Poisson-HC1 | -0.17996737387537068 | 0.023416931372871527 | 0.00018719925945155796 | 0.0001232387955969618 | 0.0006603028424291318 | 0.000464239346520594 |
| 2022 | ChatGPT Release | 4 | Poisson-HC1 | -0.2663981761517573 | 0.0572601885691565 | 1.9409183395377423e-05 | 0.02023512155270972 | 8.557685406143682e-05 | 0.042210898722856834 |
| 2022 | ChatGPT Release | 5 | Poisson-HC1 | -0.10348990076204564 | 0.07711228691777329 | 0.10976307097844235 | 0.005705024629775978 | 0.18122583633887504 | 0.014280964879697287 |
| 2022 | ChatGPT Release | 6 | Poisson-HC1 | -0.1672271320648535 | 0.007734996799731633 | 5.648639748337035e-05 | 0.6396710087351802 | 0.0002306900697869228 | 0.7321308300567845 |
| 2022 | ChatGPT Release | 7 | Poisson-HC1 | 0.028722984921954294 | 0.021237044932105355 | 0.6225248515723201 | 0.4449216606450638 | 0.7167348439467661 | 0.5586718586740607 |
| 2022 | ChatGPT Release | 8 | Poisson-HC1 | -0.21815176628849775 | 0.08109961491407552 | 0.00639838704991626 | 0.0359493873203133 | 0.01561367405891515 | 0.07044627414283618 |
| 2022 | ChatGPT Release | 9 | Poisson-HC1 | 0.10018359386820726 | -0.053604231157718 | 0.12360631004235312 | 5.556284669072022e-22 | 0.2015094466236681 | 1.437225634399963e-20 |
| 2022 | ChatGPT Release | 10 | Poisson-HC1 | -0.2838277488348978 | -0.02821173477446375 | 8.060284318945363e-06 | 0.0007781135970162431 | 4.343597660765001e-05 | 0.0024152646051384184 |
| 2022 | ChatGPT Release | 11 | Poisson-HC1 | -0.037138397767907595 | 0.012768135817839818 | 0.4019125192033267 | 0.5535831411144159 | 0.5159660750372175 | 0.6568509441969216 |
| 2022 | ChatGPT Release | 12 | Poisson-HC1 | 0.3863260250693 | -0.1341090425978716 | 0.0002616720235799168 | 0.00031624180356742737 | 0.0008984844703452009 | 0.0010577743084841536 |
| 2022 | ChatGPT Release | 13 | Poisson | 0.10374474182967702 | -0.0788873958432978 | 0.016994190192626515 | 0.005892981335947568 | 0.03648315793017976 | 0.014591858413712328 |
| 2022 | ChatGPT Release | 14 | Poisson-HC1 | 0.20893564483773977 | -0.005049990092293845 | 2.3574582635345228e-05 | 0.5659418041106792 | 0.00010163264513904386 | 0.6674328875226248 |
| 2022 | ChatGPT Release | 15 | Poisson-HC1 | -0.06500990492302812 | -0.041069314428957844 | 0.13020776758424255 | 0.0008997887237878023 | 0.2070516959946152 | 0.002727484568981776 |
| 2022 | ChatGPT Release | 16 | Poisson-HC1 | 0.3881950590238103 | 0.5300839241294492 | 0.0036299732602130628 | 3.0534299484827693e-20 | 0.009516416384882894 | 6.969004823595968e-19 |
| 2022 | ChatGPT Release | 17 | Poisson | 0.04766172159558588 | 0.09668308345169296 | 0.5111167984639284 | 0.03936326403860029 | 0.6197291181375133 | 0.07598480819391498 |
| 2022 | ChatGPT Release | 18 | Poisson-HC1 | -0.010461274959548187 | 0.027880098163779433 | 0.7963642746298293 | 0.0014902157212488415 | 0.8535617087192645 | 0.004132721659960079 |
| 2022 | ChatGPT Release | 19 | Poisson-HC1 | -0.0435365020404073 | -0.22701586890875175 | 0.2562822859185433 | 0.0 | 0.3576889458143698 | 0.0 |
| 2022 | ChatGPT Release | 20 | Poisson-HC1 | 0.05846302510880645 | 0.07569513246203921 | 0.23730460772129958 | 1.7754626097547615e-08 | 0.33239778987676616 | 1.4351656095517655e-07 |
| 2022 | ChatGPT Release | 21 | Poisson-HC1 | 0.29666734266559464 | 0.02219185715597988 | 2.1233742690945417e-05 | 0.5190165893172005 | 9.256957487738002e-05 | 0.623462652182891 |
| 2022 | ChatGPT Release | 22 | Poisson-HC1 | -0.08006623520929294 | -0.07666675232934866 | 0.1748075073961205 | 0.00986933452699916 | 0.25887523996066697 | 0.022793463074259963 |
| 2022 | ChatGPT Release | 23 | Poisson | -0.4343875795738344 | 0.11448517630777291 | 1.770956200453373e-05 | 0.09215869978284195 | 7.898057537654123e-05 | 0.1582193606891269 |
| 2022 | ChatGPT Release | 24 | Poisson | -0.035274072914576016 | -0.062359018990301156 | 0.611689395529073 | 0.1848410714129084 | 0.7084641357172546 | 0.27166036253109266 |
| 2022 | ChatGPT Release | 25 | Poisson-HC1 | 0.15387009632831142 | 0.021324025524396967 | 0.15977550529304496 | 0.03923711240262535 | 0.24121749437237916 | 0.07598480819391498 |
| 2022 | ChatGPT Release | 26 | Poisson-HC1 | -0.1662209543799767 | 0.02974624711725585 | 0.17026480015895784 | 0.5771947442311578 | 0.2540874710064448 | 0.6745528938605098 |
| 2022 | ChatGPT Release | 27 | Poisson-HC1 | 0.07981560432866097 | -0.06594621739332741 | 0.48296833060828925 | 0.20382171928355752 | 0.5930117477089121 | 0.29289935956303825 |
| 2022 | ChatGPT Release | 28 | Poisson | -0.2315939985192405 | 0.0056055568006485755 | 0.01666079381710609 | 0.9311801999406174 | 0.03611389944713499 | 0.9558145967644432 |
| 2022 | ChatGPT Release | 29 | Poisson-HC1 | -0.19715063160308183 | 0.017017598208134473 | 0.013808752502376311 | 0.034763026228363476 | 0.030099977364730388 | 0.0688166029418624 |
| 2022 | ChatGPT Release | 30 | Poisson-HC1 | -0.1095420735771315 | -0.020001153944865558 | 0.14581050478695332 | 0.47779151389008534 | 0.2265573242907611 | 0.5896180985686762 |
| 2022 | ChatGPT Release | 31 | Poisson | 0.33213906456668685 | -0.06436982967891267 | 0.001633257787857852 | 0.35047108386723724 | 0.004462704378090469 | 0.46584735892097257 |
| 2022 | ChatGPT Release | 32 | Poisson-HC1 | -0.3441098615725182 | 0.019756628080832582 | 0.0007880873939690825 | 0.618878692928327 | 0.0024268088004762225 | 0.7146575382624728 |
| 2022 | ChatGPT Release | 33 | Poisson | -0.05934721168752534 | -0.012511196321933432 | 0.795329131563727 | 0.9397769213156898 | 0.8535617087192645 | 0.9595616986065465 |
| 2022 | ChatGPT Release | 34 | Poisson-HC1 | 0.9171144583219646 | 0.1675832173937362 | 1.1868336830834907e-14 | 3.25262606584997e-14 | 1.771121034755363e-13 | 4.507210405534959e-13 |
| 2022 | ChatGPT Release | 35 | Poisson | 0.18641202735276002 | 0.007390180127974454 | 0.39348815993714414 | 0.9597381623738926 | 0.5089113535187064 | 0.9722673812038389 |
| 2022 | ChatGPT Release | 36 | Poisson-HC1 | -0.5631478431749882 | -0.34578044900735716 | 0.0018368790522993138 | 1.4844706780786291e-08 | 0.004983979526518418 | 1.2521187458576263e-07 |
| 2022 | ChatGPT Release | 37 | Poisson | -0.05882041284370577 | 0.08038916822926508 | 0.8538935735645204 | 0.7111463180090636 | 0.8954343420081998 | 0.7965349944850058 |
| 2022 | ChatGPT Release | 38 | Poisson-HC1 | -3.4617167202827464 | 0.5345047658619894 | 4.7135789824934315e-21 | 3.516125079956017e-06 | 1.143042903254657e-19 | 2.0670553500347495e-05 |

## **Supplementary Table S4. Poisson GLM residual autocorrelation diagnostics (Durbin-Watson, ACF lags 1-3, Ljung-Box p) motivating the primary Newey-West HAC specification, with HC1 and HAC standard errors and p-values per topic**

| topic_id | label | durbin_watson | acf_lag1 | acf_lag2 | acf_lag3 | ljung_box_p_lag3 | se_hc1 | se_hac_nw3 | p_hc1 | p_hac_nw3 | autocorrelation_flag | n_observations |
| --- | --- | --- | --- | --- | --- | --- | --- | --- | --- | --- | --- | --- |
| 0 | T0: General/Residual | 0.747 | 0.619 | 0.3 | 0.197 | 0.0022 | 0.002345 | 0.003163 | 0.0 | 4.2e-05 | concerning | 25 |
| 1 | T1: Surgical skills training | 0.446 | 0.704 | 0.408 | 0.162 | 0.0002 | 0.004271 | 0.006354 | 0.396646 | 0.568868 | concerning | 25 |
| 2 | T2: Student learning and pedagogy | 0.666 | 0.633 | 0.087 | -0.185 | 0.0057 | 0.008311 | 0.010738 | 0.000493 | 0.006994 | concerning | 25 |
| 3 | T3: Simulation-based education | 0.554 | 0.696 | 0.437 | 0.264 | 0.0001 | 0.002966 | 0.004732 | 0.026248 | 0.163691 | concerning | 25 |
| 4 | T4: Clinical imaging and ultrasound | 0.405 | 0.781 | 0.488 | 0.192 | 0.0 | 0.002869 | 0.004425 | 0.008754 | 0.089239 | concerning | 25 |
| 5 | T5: Nursing education | 1.074 | 0.418 | 0.18 | 0.04 | 0.1153 | 0.002496 | 0.003092 | 0.0 | 0.0 | concerning | 25 |
| 6 | T6: Pharmacy education | 0.916 | 0.494 | 0.259 | 0.07 | 0.0295 | 0.002784 | 0.00412 | 0.582533 | 0.710349 | concerning | 25 |
| 7 | T7: Dental education | 1.599 | 0.161 | -0.04 | -0.245 | 0.4541 | 0.002924 | 0.002922 | 0.007543 | 0.007514 | acceptable | 25 |
| 8 | T8: Nutrition and public health | 0.93 | 0.493 | 0.231 | 0.071 | 0.0357 | 0.003317 | 0.004495 | 0.0 | 0.0 | concerning | 25 |
| 9 | T9: Burnout and wellbeing | 0.353 | 0.782 | 0.605 | 0.32 | 0.0 | 0.003301 | 0.005445 | 0.0 | 1e-05 | concerning | 25 |
| 10 | T10: Interprofessional education | 0.279 | 0.79 | 0.599 | 0.432 | 0.0 | 0.00466 | 0.007375 | 0.001049 | 0.038399 | concerning | 25 |
| 11 | T11: Medical professionalism | 1.518 | 0.235 | 0.272 | 0.027 | 0.2895 | 0.001868 | 0.002249 | 0.0 | 0.0 | acceptable | 25 |
| 12 | T12: Diversity and equity | 0.531 | 0.696 | 0.478 | 0.319 | 0.0 | 0.006529 | 0.009626 | 0.0 | 4e-05 | concerning | 25 |
| 13 | T13: Surgical residency programs | 1.485 | 0.098 | -0.201 | -0.116 | 0.5991 | 0.002502 | 0.002256 | 0.0 | 0.0 | concerning | 25 |
| 14 | T14: Vaccination education | 1.407 | 0.243 | 0.178 | 0.051 | 0.4449 | 0.003772 | 0.004395 | 0.0 | 0.0 | concerning | 25 |
| 15 | T15: Feedback and residency training | 0.708 | 0.561 | 0.243 | 0.114 | 0.0119 | 0.003429 | 0.004869 | 0.878323 | 0.914136 | concerning | 25 |
| 16 | T16: AI and ChatGPT | 0.54 | 0.507 | 0.17 | 0.029 | 0.0437 | 0.026388 | 0.030102 | 0.001371 | 0.00502 | concerning | 25 |
| 17 | T17: Palliative care and oncology | 0.879 | 0.461 | 0.045 | -0.167 | 0.0756 | 0.003612 | 0.004227 | 1e-06 | 2.3e-05 | concerning | 25 |
| 18 | T18: Psychiatry and mental health | 1.838 | 0.015 | 0.046 | 0.029 | 0.9925 | 0.002499 | 0.002851 | 0.0 | 0.0 | acceptable | 25 |
| 19 | T19: Anatomy and dissection | 1.171 | 0.245 | 0.08 | 0.035 | 0.5902 | 0.006226 | 0.007028 | 0.000686 | 0.002634 | concerning | 25 |
| 20 | T20: Cultural competence and mentoring | 1.253 | 0.331 | 0.158 | 0.427 | 0.0242 | 0.003095 | 0.004057 | 0.504218 | 0.6104 | concerning | 25 |
| 21 | T21: HIV and sexual health | 0.922 | 0.48 | 0.205 | 0.209 | 0.0287 | 0.005503 | 0.007385 | 0.333067 | 0.470731 | concerning | 25 |
| 22 | T22: Assessment and examination | 0.903 | 0.428 | 0.237 | 0.265 | 0.0299 | 0.003348 | 0.00391 | 0.98862 | 0.990256 | concerning | 25 |
| 23 | T23: Airway management | 1.141 | 0.388 | 0.349 | -0.089 | 0.045 | 0.004243 | 0.005956 | 0.0 | 0.0 | concerning | 25 |
| 24 | T24: Physical therapy education | 1.132 | 0.405 | 0.196 | -0.048 | 0.1216 | 0.002851 | 0.003572 | 0.492292 | 0.583648 | concerning | 25 |
| 25 | T25: Virtual reality simulation | 0.86 | 0.55 | 0.225 | 0.184 | 0.0116 | 0.004926 | 0.007114 | 0.0 | 0.0 | concerning | 25 |
| 26 | T26: Geriatrics and dementia | 0.955 | 0.422 | 0.2 | -0.11 | 0.087 | 0.006249 | 0.008262 | 0.0 | 9e-06 | concerning | 25 |
| 27 | T27: Veterinary education | 1.077 | 0.425 | 0.196 | -0.018 | 0.1016 | 0.006887 | 0.00846 | 0.132189 | 0.220324 | concerning | 25 |
| 28 | T28: Antimicrobial stewardship | 1.417 | 0.267 | 0.118 | -0.361 | 0.0929 | 0.003786 | 0.004509 | 0.681812 | 0.730632 | concerning | 25 |
| 29 | T29: Empathy and emotional intelligence | 1.125 | 0.424 | 0.293 | 0.153 | 0.0401 | 0.004498 | 0.006047 | 0.0 | 0.0 | concerning | 25 |
| 30 | T30: Pain management and opioids | 1.195 | 0.38 | 0.006 | -0.11 | 0.219 | 0.004215 | 0.004483 | 0.663196 | 0.682174 | concerning | 25 |
| 31 | T31: Dermatology education | 1.189 | 0.342 | 0.116 | -0.103 | 0.2608 | 0.005885 | 0.007607 | 0.248567 | 0.372007 | concerning | 25 |
| 32 | T32: Duty hours and work restrictions | 0.622 | 0.619 | 0.257 | -0.028 | 0.0053 | 0.007515 | 0.011047 | 5e-06 | 0.001847 | concerning | 25 |
| 33 | T33: CAM and acupuncture | 2.251 | -0.187 | 0.027 | -0.319 | 0.2485 | 0.005404 | 0.004336 | 0.0 | 0.0 | acceptable | 25 |
| 34 | T34: Climate change and health | 0.671 | 0.595 | 0.409 | 0.187 | 0.0012 | 0.021325 | 0.029963 | 0.001135 | 0.020536 | concerning | 25 |
| 35 | T35: Spirituality and religious care | 1.289 | 0.328 | 0.135 | 0.006 | 0.314 | 0.007094 | 0.006102 | 1.2e-05 | 0.0 | concerning | 25 |
| 36 | T36: JAMA specialty journals | 1.57 | 0.159 | 0.165 | -0.11 | 0.5979 | 0.013427 | 0.015728 | 0.06793 | 0.119147 | acceptable | 25 |
| 37 | T37: Tuberculosis education | 2.45 | -0.253 | -0.057 | -0.124 | 0.4982 | 0.008615 | 0.005299 | 0.0 | 0.0 | acceptable | 25 |
| 38 | T38: SE Asian medical education journals | 0.722 | 0.6 | 0.483 | 0.229 | 0.0003 | 0.025962 | 0.039352 | 0.273614 | 0.470128 | concerning | 25 |

## **Supplementary Table S5. Full 39-topic keywords (top-10 c-TF-IDF) and top-5 representative titles per topic**

| Topic | Count | Name | Representation | Representative_Titles |
| --- | --- | --- | --- | --- |
| 0 | 25095 | 0_the_medical_of_and | the, medical, of, and, in, to, education, for, research, is | Opening the “Black Box” of GME Costs and Benefits: A Conceptual Model and a Call for Systematic Studies | Evaluación de perfiles de egreso en facultades de medicina peruanas: Alineamiento con el marco de competencias MINSA y el modelo CanMEDS | Ensuring the standard of medical graduates in Malaysia. | Impact of Interventions to Increase the Proportion of Medical Students Choosing a Primary Care Career: A Systematic Review. | The availability of diseases for medical students in a university hospital |
| 2 | 19032 | 2_learning_the_students_and | learning, the, students, and, to, of, in, medical, teaching, for | Health Sciences Library Closings; A Context Sensitive Pilot Study. | Computer-based medical education in Benha University, Egypt: knowledge, attitude, limitations, and suggestions. | COVID-19: An impetus to reform paediatrics curriculum for undergraduate medical students in Iraq | Impact of the COVID-19 Pandemic on the Clinical Learning Environment: Addressing Identified Gaps and Seizing Opportunities | Case Management on the Front Lines of COVID-19: The Importance of the Individualized Care Plan Across Care Settings. |
| 1 | 15981 | 1_the_and_of_surgical | the, and, of, surgical, were, was, in, training, for, to | Relationship between hospital or surgeon volume and outcomes in joint arthroplasty: protocol for a suite of systematic reviews and dose-response meta-analyses. | Learning curve of consolers and bedside surgeons fused robotic-assisted thoracoscopic segmentectomy: insights from the initial 100 cases. | Patient-related factors associated with successful cannulation by trainees during hands-on endoscopic retrograde cholangiopancreatography training. | The New York Section EMPIRE Collaborative: Piloting a Multi-Institutional, Simulation-Based Surgical Skills Boot Camp for Junior Urology Residents. | Results of training with a low-cost simulation model for endoscope-assisted scaphocephaly repair. |
| 3 | 15232 | 3_simulation_the_and_of | simulation, the, and, of, in, to, training, for, emergency, was | Clinical factors associated with the non-utilization of an anaesthesia incident reporting system. | A survey of the knowledge of cardiopulmonary rescucitation and the impact of training on nurses at the University of Benin teaching hospital, Nigeria. | Training surgeons and the informed consent discussion in paediatric patients: a qualitative study examining trainee participation disclosure. | Mapping the terrain of simulation faculty development: protocol for a scoping review | Barriers and facilitators to accessing skilled birth attendants in Afar region, Ethiopia. |
| 5 | 14222 | 5_nursing_nurses_the_and | nursing, nurses, the, and, of, to, nurse, in, clinical, practice | Evaluation of a 16-week critical care internship program using a Staff Development Program Effectiveness Evaluation Tool. | Uncovering blind spots in education and practice leadership: towards a collaborative response to the nurse shortage. | New graduate nurse competencies-Part I: Perceptions of academic faculty and acute care hospital practice leaders in the State of Maryland. | A review of a supervised practice programme for overseas nurses. | Exploring intensive care nurses’ perception of simulation-based learning: A systematic review and meta-synthesis. |
| 4 | 12947 | 4_of_the_and_in | of, the, and, in, to, ultrasound, was, for, were, with | Hand-held cardiac ultrasound screening performed by family doctors with remote expert support interpretation. | Use of a risk assessment method to improve the safety of negative pressure wound therapy. | Technology-Enhanced Simulation Improves Trainee Readiness Transitioning to Cardiothoracic Training. | Computer-based radiation safety training for hospital radiation workers. | Barriers to colorectal cancer screening: inadequate knowledge by physicians. |
| 11 | 10918 | 11_medical_the_of_and | medical, the, of, and, to, in, that, ethics, is, as | WHO IS THE DOCTOR? COMPARISON OF PHYSICIAN REPRESENTATIONS BETWEEN MEDICAL ACADEMIC AND SUS USERS | Exploration and Consideration on Medical Ethics Education Mode of Uniting Knowledge and Action in Internship Medical Students | Research ethics capacity development in Africa: exploring a model for individual success. | Crafting a Profession | A comparison of experiences, competencies and development needs of doctor managers in Kenya and the United Kingdom (UK) |
| 10 | 10787 | 10_interprofessional_and_the_communication | interprofessional, and, the, communication, to, of, patient, in, ipe, for | Patients’ Perceptions of Bedside Rounding. | Error disclosure: what residents say and what patients find effective. | Impacts of a Community-academic Partnership Program Facilitated by Medical Students on a Student Community: A Reflection on MySTAR | Training the Clinical Thinking Ability of Students of the Seven-year Program in Internal Medicine Internship | The subjective experience of collaboration in interprofessional tutor teams: A qualitative study. |
| 6 | 10481 | 6_pharmacy_the_and_of | pharmacy, the, and, of, to, in, students, pharmacists, for, that | Exploring the impact of instructional approaches on the learning and transfer of medication dosage calculation competency. | Relationships between colleges of pharmacy and academic medical centers | Pharmacy Students’ Perspectives on Interprofessional Learning in a Simulated Patient Care Ward Environment | Sources of gender differences in competency beliefs and retention in an introductorypremedicalscience course | Promoting academic integrity among health care students |
| 9 | 10401 | 9_burnout_and_of_the | burnout, and, of, the, students, to, in, stress, medical, were | Sleep medicine exposure offered by United States residency training programs. | Cigarette smoking at workplace among resident physicians and nurses in Mansoura University Hospital. | Does Gender Predict Medical Students’ Stress in Mansoura, Egypt? | Using standardized patients to train telephone counselors for a clinical trial. | A study on the mental health of students at a medical school during COVID-19 outbreak: a retrospective study. |
| 8 | 10129 | 8_and_of_the_in | and, of, the, in, to, with, children, for, were, nutrition | Exercise medicine and physical activity promotion: core curricula for US medical schools, residencies and sports medicine fellowships: developed by the American Medical Society for Sports Medicine and endorsed by the Canadian Academy of Sport and Exercise Medicine. | Beyond the Big Screen: Avatars Prepare Graduate Students for Real-World Practice | Supporting nursing students with learning disabilities: a metacognitive approach. | Growth under intervention by means of instructional time expended: Empirical illustrations of applicable models. | Identification of the social and cognitive processes underlying human cumulative culture. |
| 7 | 9489 | 7_dental_the_of_and | dental, the, of, and, students, in, oral, to, dentistry, was | The State of the Art in Evaluating the Performance of Assistant and Associate Deans as Seen by Deans and Assistant and Associate Deans | Canadian Dentists’ View of the Utility and Accessibility of Dental Research | The Current State of Predoctoral Orthodontic Education in the United States | Provider and patient perceptions about dental care during pregnancy. | Application of Progressive Teaching in Outpatient Clinical Practice Teaching in Department of Oral and Maxillofacial Surgery |
| 13 | 8702 | 13_surgery_surgical_the_of | surgery, surgical, the, of, and, to, in, residency, for, training | Virtual obstetrics and gynecology fellowship interviews during the coronavirus disease 2019 (COVID-19) pandemic: a survey study. | How Comprehensive Are Aesthetic Surgery Fellowship Websites? | The development of an Oncoplastic Training Center - OTC. | Ready or Not? Obstetrics and Gynecology Resident Preparedness for Female Pelvic Medicine and Reconstructive Surgery Training. | Analysis of Orthopaedic Surgery Residency Match Results: 2016 to 2022 |
| 15 | 8497 | 15_the_and_to_of | the, and, to, of, for, in, feedback, residents, that, medical | Application and Effectiveness Analysis of DOPS in Pediatric Clinical Skills Teaching | The Association Between Residency Characteristics and Graduates Caring for Children: A Family Medicine Residency Outcomes Project | The Effect of Training in Primary Health Care Centers on Medical Students’ Clinical Skills | 175: Procedural Skills in Pediatric Residency and in Practice | Written feedback What is it good for and how can we do it well? |
| 12 | 8289 | 12_and_the_of_to | and, the, of, to, in, women, gender, that, for, diversity | Student-Right-To-Know Completion Rate (Total Completers within 150%/ Adjusted Cohort)* | The forgotten history of defunct black medical schools in the 19th and 20th centuries and the impact of the Flexner Report. | All Validities are Not Created Equal: Determinants of Variation in SAT Validity Across Schools | Japanese women’s marks soar as medical school exam rigging ends | Cutting for Equity—Reconstructing the Culture of Surgery that is Still Toxic for Women Surgeons |
| 22 | 7702 | 22_the_assessment_of_and | the, assessment, of, and, to, students, in, examination, for, is | Paired or Pooled Analyses in Continuing Medical Education, Which One is Better? | 73 Trainees taking charge – design and delivery of a paces preparation course | Impact of COVID – 19 on practical examination for final year MBBS students in General Medicine | Effect of a multimodal training on the ability of medical students to administer the MMSE: a comparative study. | A Mixed-Methods Study of Prelicensure Nursing Students Changing Answers on Multiple Choice Examinations |
| 18 | 5512 | 18_mental_psychiatry_and_the | mental, psychiatry, and, the, of, in, to, psychiatric, health, training | Stigma towards Mental Disorders among Nursing Students and Professionals: A Bibliometric Analysis. | Psychiatric Resident Participation in an Asylum Clinic: a Single-Institutional Experience. | A survey of the perceptions and practices of faculty in clinical neuropsychology doctoral training programs: is heterogeneity the norm? | Disrupting the status quo in psychology training: Centering structural competence in accreditation. | Converging Forces About to Reshape Psychiatry Training |
| 19 | 4815 | 19_anatomy_students_the_of | anatomy, students, the, of, dissection, and, to, in, anatomical, learning | Development of Integrated Anatomy E-Tutorial by Medical Students, Using Anatomy-TV | Efficacy of Gross Anatomy Cadaver Online Video Learning Modules in First‐Year Physical Therapy Students | The Cadaver Conundrum: Sourcing and Anatomical Embalming of Human Dead Bodies by Medical Schools during and after COVID-19 Pandemic: Review and Recommendations. | We are what we do: Examining learner‐generated content in the anatomy laboratory through the lens of activity theory | “Let’s Get Physical”: Advantages of a physical model over 3D computer models and textbooks in learning imaging anatomy |
| 25 | 4688 | 25_simulation_virtual_vr_the | simulation, virtual, vr, the, and, to, in, of, learning, game | A84 Medical Escape Rooms as a novel approach to simulation | The comparison of teaching efficiency between virtual reality and traditional education in medical education: a systematic review and meta-analysis. | Designing branching scenarios to support clinical reasoning in dental education | Transforming simulation in healthcare to enhance interprofessional collaboration leveraging big data analytics and artificial intelligence. | Evaluating the ability of students to learn and utilize a novel telepresence platform, Proximie. |
| 16 | 4182 | 16_ai_chatgpt_and_the | ai, chatgpt, and, the, in, of, to, ophthalmology, for, were | The use of digital imaging in the identification of skip areas after laser treatment for retinopathy of prematurity and its implications for education and patient care. | Readability assessment of patient education materials from the American Academy of Otolaryngology–Head and Neck Surgery Foundation. | Can virtual reality surgical simulator improve the function of the non-dominant hand in ophthalmic surgeons? | The role of case mix in the relation of volume and outcome in phacoemulsification. | Experiences of nursing and medical students with the use of Artificial Intelligence tools such as ChatGPT in Uganda. |
| 17 | 4157 | 17_palliative_care_cancer_and | palliative, care, cancer, and, of, oncology, the, to, in, patients | Development and validation of the Palliative Care Knowledge Scale (PaCKS). | A Humanistic Role Model in My Medical Career | Communication in palliative care: talking about the end of life, before the end of life. | Palliative Care Policy Analysis in Iran: A Conceptual Model. | Health Professions Education |
| 24 | 3973 | 24_and_the_of_therapy | and, the, of, therapy, physical, to, in, clinical, physiotherapy, students | Burn rehabilitation: Evaluation of physiotherapists’ knowledge and awareness levels. | Innovation and Competency Development in Occupational Therapy Fieldwork During the COVID-19 Pandemic. | Research capacity and culture among hand therapists in Australia: A cross-sectional survey. | Chiropractic-primary care, neuromusculoskeletal care, or musculoskeletal care? Results of a survey of chiropractic college presidents, chiropractic organization leaders, and Connecticut-licensed doctors of chiropractic. | Importance of Building Confidence in Patient Communication and Clinical Skills Among Chiropractic Students |
| 20 | 3905 | 20_cultural_and_to_mentoring | cultural, and, to, mentoring, the, of, in, health, students, for | Student teachers’ beliefs about mentoring and learning to teach during teaching practice. | White racial identity, color-blind racial attitudes, and multicultural counseling competence. | Context of care for Jordanian women. | A review of transcultural nursing. | Medical Student’s Perceptions of the Mentoring Program: A Survey from Religious Medical School in Taiwan |
| 21 | 3902 | 21_hiv_sexual_and_to | hiv, sexual, and, to, of, abortion, in, health, the, for | Geographic distribution of reproductive endocrinology and infertility (REI) fellowships in the United States. | Web-Based Training for Nurses on Using a Decision Aid to Support Shared Decision-making About Prenatal Screening: Parallel Controlled Trial. | The role of training in effective simulated self-injection of subcutaneous depot medroxyprogesterone acetate: observations from a usability study. | Development and evaluation of a clinical simulation-based educational innovation on sexual orientation and gender identity in emergency medicine. | Young people and HIV prevention in Australian schools. |
| 14 | 3871 | 14_the_of_vaccination_and | the, of, vaccination, and, vaccine, simulation, to, in, for, based | Unbiased curriculum learning enhanced global-local graph neural network for protein thermodynamic stability prediction. | Phylogenetic Methods Meet Deep Learning. | Simulation-based interval chance-constrained quadratic programming model for water quality management: A case study of the central Grand River in Ontario, Canada. | Monte Carlo simulation of the acquisition conditions for 177Lu molecular imaging of hepatic tumors. | Genetic algorithm for obtaining potential energy curve of diatomic molecules based on dispersed fluorescence spectra. |
| 23 | 3074 | 23_airway_intubation_the_asthma | airway, intubation, the, asthma, of, and, in, was, with, to | Prevention of invasive ventilation (PRiVENT)-a prospective, mixed-methods interventional, multicentre study with a parallel comparison group: study protocol. | Utilization of just-in-time training for nursing education using the LA Phonospirometry asthma tool. | Automatic and Objective Assessment of Motor Skills Performance in Flexible Bronchoscopy. | Quantification of the learning curve for percutaneous dilatational tracheotomy. | Awareness about the disease in asthma patients receiving treatment from physicians at different levels. |
| 26 | 2366 | 26_older_dementia_geriatric_care | older, dementia, geriatric, care, and, the, of, geriatrics, adults, in | Do general practitioners recognize mild cognitive impairment in their patients? | Frailty and cancer: Implications for oncology surgery, medical oncology, and radiation oncology. | Delirium in postacute and long-term care. | An exploration of medical student attitudes towards older persons and frailty during undergraduate training. | The educational impact of home care in community medicine training in a Japanese medical residency program. |
| 28 | 2283 | 28_antibiotic_antibiotics_antimicrobial_of | antibiotic, antibiotics, antimicrobial, of, and, the, in, to, infection, were | A cross-sectional study: Comparing the attitude and knowledge of medical and non-medical students toward 2019 novel coronavirus. | Enhancing Pediatric Nurses’ Knowledge, Attitude, and Practice Regarding Health Care-Acquired Infections: A Quasi Experimental Study. | Educational interventions to improve antibiotic use in the community: report from the International Forum on Antibiotic Resistance (IFAR) colloquium, 2002. | Nurses’ knowledge on nosocomial infections preventive measures and its associated factors in Ghana: a cross-sectional study. | Editor response for version 1 |
| 30 | 2110 | 30_pain_opioid_management_and | pain, opioid, management, and, of, the, to, patients, in, chronic | 50 Bridging the gap between education and health: What youth need educators to know about chronic pain | The development of a recovery coaching training curriculum to facilitate linkage to and increase retention on medications for opioid use disorder. | Guiding Principles for the Pain Medicine Physician—In a Not So Ideal World | “Nothing about us without us”: The route to developing useful participatory activities for adolescents with chronic pain | Improving Pain Practices Through Core Competencies |
| 27 | 2049 | 27_veterinary_animal_the_and | veterinary, animal, the, and, of, to, in, students, veterinarians, for | Using Machine Learning in Veterinary Medical Education: An Introduction for Veterinary Medicine Educators. | Perceptions and Experiences of Veterinary Assistants, Veterinary Technicians/Nurses, and Veterinary Technician Specialists | What can’t be taught. | STARTING ON THE RIGHT FOOT: DOES SCHOOL CHOICE AFFECT VETERINARIAN STARTING SALARIES? | Benefits and challenges of animal-assisted therapy in older adults: a literature review. |
| 29 | 1997 | 29_empathy_and_the_emotional | empathy, and, the, emotional, students, of, ei, to, in, medical | Rethinking empathy decline: results from an OSCE | The lived experience of medical training and emotional intelligence | Importance of communication in medical practice and medical education: An emphasis on empathy and attitudes and their possible influences | Insights on the Nationwide Project in Osteopathic Medical Education and Empathy (POMEE) | Self-assessed affective and cognitive empathy and it’s predictors among medical students in a private institution in Malaysia |
| 32 | 1656 | 32_hours_residents_hour_resident | hours, residents, hour, resident, duty, sleep, work, call, of, and | Staff and resident perceptions on the introduction of a team based multi-specialty resident night shift system. | Post-call cognitive function and satisfaction in medical students on different call schedules: a prospective observational pilot study. | A time-motion study of inpatient rounds using a family-centered rounds model. | Preventing physician quality of life from impinging on patient quality of care: weakening the weekend effect. | The Role of High School Football Coverage in Resident Education. |
| 31 | 1493 | 31_dermatology_skin_dermatologists_of | dermatology, skin, dermatologists, of, and, the, in, to, melanoma, with | A prospective study of the epidemiological and clinical patterns of recurrent dermatophytosis at a tertiary care hospital in India. | Effects of Creating Awareness Through Photographs and Posters on Skin Self-Examination in Nursing Students. | Prevalence of acne and its impact on quality of life and practices regarding self-treatment among medical students. | General practice registrars’ use of dermoscopy: Prevalence, associations and influence on diagnosis and confidence. | Teaching Benign Skin Lesions as a Strategy to Improve the Triage Amalgamated Dermoscopic Algorithm (TADA). |
| 33 | 764 | 33_cam_acupuncture_complementary_medicine | cam, acupuncture, complementary, medicine, and, of, alternative, the, therapies, in | Innovations in integrative healthcare education: undergraduate holistic studies at San Francisco State University and the CAM in undergraduate medical education project in Canada. | Knowledge and practice of complementary medicine amongst public primary care clinic doctors in Kinta district, Perak. | The landscape of Ayurveda education in India: Current status and prospects. | Rare but serious complications of acupuncture: traumatic lesions. | A retrospective survey of patients at the University of Salford Acupuncture Clinic. |
| 34 | 670 | 34_climate_health_environmental_change | climate, health, environmental, change, planetary, and, to, the, sustainability, of | Responding to the need of postgraduate education for Planetary Health: Development of an online Master’s Degree. | Climate change: could it help develop ‘adaptive expertise’? | Virtual education strategies in the context of sustainable health care and medical education: A topic modelling analysis of four decades of research. | The Relevance of Sustainability and the Climate Crisis to the Nursing Profession and Nursing Education: A Literature Review. | Environmental Health Education for Asbestos-Contaminated Communities in Italy: The Casale Monferrato Case Study. |
| 35 | 479 | 35_spiritual_spirituality_care_religious | spiritual, spirituality, care, religious, and, of, the, religion, in, to | A parallel process seminar for use in programs of Clinical Pastoral Education (CPE). | Religious Community Partnerships: a Novel Approach to Teaching Psychiatry Residents about Religious and Cultural Factors in the Mental Health Care of African-Americans. | Experience with clinical pastoral education in the context of The Discipline. | Find Balance, Let Go of Blame | Demonstrating the Viability of Spiritual Care Education: A Pilot Study on Integrating Spirituality and Health into Medical Education. |
| 36 | 382 | 36_jama_sign_neurology_psychiatry | jama, sign, neurology, psychiatry, forum, surgery, archives, cardiology, neck, otolaryngology | Drama in Medicine? | Combating Discrimination in Medical Education | Limitations Concerning the Association of Physician Sex and Patient Outcomes | Assessing Performance of Internal Medicine Residents | Stories Doctors Tell |
| 38 | 332 | 38_journal_seajme_east_asian | journal, seajme, east, asian, ideal, region, south, europub, searame, uplifting | Clinical reasoning of Indonesian medical students as measured by diagnostic thinking inventory | Editorial | Computer and internet use by the undergraduate medical students of Bangladesh | The role of technology in adapting to the new normal of medical education for South East Asian Region | Living anatomy in the 21<sup>st</sup> century: how far can we go? |
| 37 | 301 | 37_tb_tuberculosis_of_treatment | tb, tuberculosis, of, treatment, the, in, and, patients, was, to | Improved polyacrylamide-based artificial sputum with formalin-fixed tubercle bacilli for training of tuberculosis microscopists. | Trade-offs between clinical performance and test accessibility in tuberculosis diagnosis: a multi-country modelling approach for target product profile development. | Resident doctors’ attitudes toward tuberculosis patients. | The effect of a tuberculosis chest X-ray image reference set on non-expert reader performance. | Faculty Opinions recommendation of Delays and loss to follow-up before treatment of drug-resistant tuberculosis following implementation of Xpert MTB/RIF in South Africa: A retrospective cohort study. |

## **Supplementary Table S6. Topic label confidence heuristic (lexical overlap between human-assigned label and top-5 representative titles)**

| topic_id | human_label | label_content_words | n_top_titles | titles_with_label_overlap | label_in_title_rate | confidence |
| --- | --- | --- | --- | --- | --- | --- |
| 0 | General/Residual | (empty) | 5 | 0 |  | N/A |
| 1 | Surgical skills training | skills; surgical | 5 | 1 | 0.2 | Low |
| 2 | Student learning and pedagogy | pedagogy | 5 | 0 | 0.0 | Low |
| 3 | Simulation-based education | based; simulation | 5 | 1 | 0.2 | Low |
| 4 | Clinical imaging and ultrasound | imaging; ultrasound | 5 | 1 | 0.2 | Low |
| 5 | Nursing education | nursing | 5 | 0 | 0.0 | Low |
| 6 | Pharmacy education | pharmacy | 5 | 2 | 0.4 | Medium |
| 7 | Dental education | dental | 5 | 2 | 0.4 | Medium |
| 8 | Nutrition and public health | health; nutrition; public | 5 | 0 | 0.0 | Low |
| 9 | Burnout and wellbeing | burnout; wellbeing | 5 | 0 | 0.0 | Low |
| 10 | Interprofessional education | interprofessional | 5 | 1 | 0.2 | Low |
| 11 | Medical professionalism | professionalism | 5 | 0 | 0.0 | Low |
| 12 | Diversity and equity | diversity; equity | 5 | 1 | 0.2 | Low |
| 13 | Surgical residency programs | residency; surgical | 5 | 1 | 0.2 | Low |
| 14 | Vaccination education | vaccination | 5 | 0 | 0.0 | Low |
| 15 | Feedback and residency training | feedback; residency | 5 | 3 | 0.6 | Medium |
| 16 | AI and ChatGPT | ai; chatgpt | 5 | 1 | 0.2 | Low |
| 17 | Palliative care and oncology | care; oncology; palliative | 5 | 3 | 0.6 | Medium |
| 18 | Psychiatry and mental health | health; mental; psychiatry | 5 | 2 | 0.4 | Medium |
| 19 | Anatomy and dissection | anatomy; dissection | 5 | 4 | 0.8 | High |
| 20 | Cultural competence and mentoring | competence; cultural; mentoring | 5 | 3 | 0.6 | Medium |
| 21 | HIV and sexual health | health; hiv; sexual | 5 | 2 | 0.4 | Medium |
| 22 | Assessment and examination | assessment; examination | 5 | 1 | 0.2 | Low |
| 23 | Airway management | airway; management | 5 | 0 | 0.0 | Low |
| 24 | Physical therapy education | physical; therapy | 5 | 1 | 0.2 | Low |
| 25 | Virtual reality simulation | reality; simulation; virtual | 5 | 3 | 0.6 | Medium |
| 26 | Geriatrics and dementia | dementia; geriatrics | 5 | 0 | 0.0 | Low |
| 27 | Veterinary education | veterinary | 5 | 2 | 0.4 | Medium |
| 28 | Antimicrobial stewardship | antimicrobial; stewardship | 5 | 0 | 0.0 | Low |
| 29 | Empathy and emotional intelligence | emotional; empathy; intelligence | 5 | 5 | 1.0 | High |
| 30 | Pain management and opioids | management; opioids; pain | 5 | 4 | 0.8 | High |
| 31 | Dermatology education | dermatology | 5 | 0 | 0.0 | Low |
| 32 | Duty hours and work restrictions | duty; hours; restrictions; work | 5 | 0 | 0.0 | Low |
| 33 | CAM and acupuncture | acupuncture; cam | 5 | 3 | 0.6 | Medium |
| 34 | Climate change and health | change; climate; health | 5 | 5 | 1.0 | High |
| 35 | Spirituality and religious care | care; religious; spirituality | 5 | 2 | 0.4 | Medium |
| 36 | JAMA specialty journals | jama; journals; specialty | 5 | 0 | 0.0 | Low |
| 37 | Tuberculosis education | tuberculosis | 5 | 5 | 1.0 | High |
| 38 | SE Asian medical education journals | asian; journals; se | 5 | 1 | 0.2 | Low |

## **Supplementary Table S7. Per-event interrupted time series (ITS) coefficients for individual policy and technology reference periods**

| event_year | event_name | topic_id | model_type | beta_time | beta_level_change | beta_slope_change | p_level_change | p_slope_change | p_level_fdr | p_slope_fdr |
| --- | --- | --- | --- | --- | --- | --- | --- | --- | --- | --- |
| 2003 | WFME Global Standards | 0 | Poisson-HC1 | -0.151636 | 0.417111 | 0.134703 | 0.0 | 0.0 | 0.0 | 0.0 |
| 2003 | WFME Global Standards | 1 | Poisson-HC1 | 0.197722 | -0.002722 | -0.204707 | 0.949545 | 0.0 | 0.951999 | 0.0 |
| 2003 | WFME Global Standards | 2 | Poisson-HC1 | -0.025828 | -0.260632 | 0.052652 | 0.039555 | 0.18848 | 0.072053 | 0.261062 |
| 2003 | WFME Global Standards | 3 | Poisson-HC1 | 0.080939 | 0.035651 | -0.07614 | 0.633607 | 0.014051 | 0.694462 | 0.029311 |
| 2003 | WFME Global Standards | 4 | Poisson-HC1 | 0.005463 | 0.156523 | -0.014812 | 1.7e-05 | 0.172149 | 6.9e-05 | 0.246472 |
| 2003 | WFME Global Standards | 5 | Poisson-HC1 | -0.08808 | 0.174875 | 0.058281 | 0.012884 | 0.032811 | 0.027395 | 0.060622 |
| 2003 | WFME Global Standards | 6 | Poisson-HC1 | 0.046066 | 0.115394 | -0.050078 | 0.037886 | 5e-06 | 0.069667 | 2.3e-05 |
| 2003 | WFME Global Standards | 7 | Poisson-HC1 | 0.146947 | -0.410229 | -0.150961 | 0.0 | 0.0 | 0.0 | 0.0 |
| 2003 | WFME Global Standards | 8 | Poisson-HC1 | -0.001229 | 0.047609 | -0.038622 | 0.549002 | 0.18633 | 0.622844 | 0.260997 |
| 2003 | WFME Global Standards | 9 | Poisson-HC1 | -0.047434 | -0.125101 | 0.074316 | 0.027766 | 0.0 | 0.05307 | 0.0 |
| 2003 | WFME Global Standards | 10 | Poisson-HC1 | 0.193086 | -0.040142 | -0.183856 | 0.559836 | 0.0 | 0.633284 | 0.0 |
| 2003 | WFME Global Standards | 11 | Poisson-HC1 | -0.009098 | 0.11091 | -0.008708 | 0.224248 | 0.820482 | 0.293947 | 0.854933 |
| 2003 | WFME Global Standards | 12 | Poisson-HC1 | -0.03026 | -0.287422 | 0.070416 | 0.003992 | 4.9e-05 | 0.009561 | 0.000183 |
| 2003 | WFME Global Standards | 13 | Poisson | -0.222552 | 0.430556 | 0.244813 | 0.010191 | 0.000874 | 0.02209 | 0.002405 |
| 2003 | WFME Global Standards | 14 | Poisson-HC1 | -0.282685 | 0.726058 | 0.315971 | 0.0 | 0.0 | 0.0 | 0.0 |
| 2003 | WFME Global Standards | 15 | Poisson-HC1 | -0.139081 | 0.073691 | 0.141027 | 0.233321 | 0.0 | 0.302771 | 0.0 |
| 2003 | WFME Global Standards | 16 | Poisson-HC1 | -0.082882 | -1.211874 | 0.220207 | 0.005694 | 0.0 | 0.013309 | 0.0 |
| 2003 | WFME Global Standards | 17 | Poisson-HC1 | 0.085888 | -0.390072 | -0.09954 | 8e-05 | 0.024973 | 0.000282 | 0.048937 |
| 2003 | WFME Global Standards | 18 | Poisson-HC1 | 0.070599 | -0.091413 | -0.1135 | 0.027718 | 0.0 | 0.05307 | 0.0 |
| 2003 | WFME Global Standards | 19 | Poisson-HC1 | 0.12635 | 0.087179 | -0.115916 | 0.609998 | 0.123624 | 0.676226 | 0.188843 |
| 2003 | WFME Global Standards | 20 | Poisson-HC1 | -0.048852 | 0.031473 | 0.048849 | 0.67312 | 0.025773 | 0.725474 | 0.05 |
| 2003 | WFME Global Standards | 21 | Poisson-HC1 | -0.055185 | -0.193896 | 0.056712 | 0.057422 | 0.040796 | 0.099463 | 0.073623 |
| 2003 | WFME Global Standards | 22 | Poisson-HC1 | 0.077817 | -0.003917 | -0.08443 | 0.955259 | 0.0 | 0.955259 | 0.0 |
| 2003 | WFME Global Standards | 23 | Poisson-HC1 | 0.031194 | 0.077255 | -0.064548 | 0.183363 | 0.0 | 0.257771 | 0.0 |
| 2003 | WFME Global Standards | 24 | Poisson-HC1 | 0.085162 | -0.257236 | -0.082921 | 0.0 | 0.0 | 0.0 | 0.0 |
| 2003 | WFME Global Standards | 25 | Poisson-HC1 | 0.199068 | -0.828336 | -0.124845 | 0.0 | 0.016043 | 0.0 | 0.03311 |
| 2003 | WFME Global Standards | 26 | Poisson-HC1 | 0.210332 | 0.11812 | -0.254111 | 0.041869 | 0.0 | 0.075074 | 0.0 |
| 2003 | WFME Global Standards | 27 | Poisson-HC1 | 0.473174 | -0.48874 | -0.490536 | 0.030185 | 0.000594 | 0.057131 | 0.001746 |
| 2003 | WFME Global Standards | 28 | Poisson-HC1 | -0.159684 | 0.390891 | 0.1536 | 0.0 | 0.0 | 0.0 | 0.0 |
| 2003 | WFME Global Standards | 29 | Poisson-HC1 | 0.311265 | -0.449604 | -0.24886 | 0.000681 | 4e-06 | 0.001972 | 1.9e-05 |
| 2003 | WFME Global Standards | 30 | Poisson-HC1 | -0.082882 | 0.085186 | 0.082737 | 0.532446 | 0.095059 | 0.607479 | 0.151159 |
| 2003 | WFME Global Standards | 31 | Poisson | -0.029054 | -0.437416 | 0.043954 | 0.135284 | 0.74306 | 0.201885 | 0.785578 |
| 2003 | WFME Global Standards | 32 | Poisson-HC1 | 0.139476 | 0.600764 | -0.187839 | 6.9e-05 | 0.008081 | 0.000248 | 0.018336 |
| 2003 | WFME Global Standards | 33 | Poisson | 0.144079 | -0.314933 | -0.231846 | 0.257531 | 0.082261 | 0.327613 | 0.135243 |
| 2003 | WFME Global Standards | 34 | Poisson-HC1 | 0.400448 | -1.542304 | -0.306662 | 0.000447 | 0.089835 | 0.001344 | 0.145233 |
| 2003 | WFME Global Standards | 35 | Poisson | -0.126675 | -0.105937 | 0.111784 | 0.821881 | 0.593588 | 0.854933 | 0.661817 |
| 2003 | WFME Global Standards | 36 | Poisson-HC1 | 0.093151 | 0.335715 | -0.139055 | 0.204929 | 0.1499 | 0.278032 | 0.217019 |
| 2003 | WFME Global Standards | 37 | Poisson | -0.015171 | 0.165341 | -0.043924 | 0.769596 | 0.866141 | 0.807036 | 0.890975 |
| 2003 | WFME Global Standards | 38 | Poisson-HC1 | 19.705224 | -17.301136 | -19.765846 |  |  |  |  |
| 2013 | CBME Milestones (ACGME) | 0 | Poisson-HC1 | 0.008185 | -0.047267 | -0.036183 | 0.230178 | 6e-06 | 0.299695 | 2.7e-05 |
| 2013 | CBME Milestones (ACGME) | 1 | Poisson-HC1 | 0.027059 | -0.049333 | -0.04529 | 0.384232 | 4.9e-05 | 0.464225 | 0.000183 |
| 2013 | CBME Milestones (ACGME) | 2 | Poisson-HC1 | -0.02005 | 0.133531 | 0.057357 | 0.213527 | 0.003665 | 0.286673 | 0.008929 |
| 2013 | CBME Milestones (ACGME) | 3 | Poisson-HC1 | 0.030407 | -0.030857 | -0.036105 | 0.476783 | 0.0 | 0.558888 | 0.0 |
| 2013 | CBME Milestones (ACGME) | 4 | Poisson-HC1 | 0.002749 | 0.102909 | -0.027259 | 0.02142 | 0.000419 | 0.042403 | 0.00127 |
| 2013 | CBME Milestones (ACGME) | 5 | Poisson-HC1 | -0.022844 | -0.024208 | -0.0086 | 0.629983 | 0.374386 | 0.692446 | 0.454955 |
| 2013 | CBME Milestones (ACGME) | 6 | Poisson-HC1 | 0.028146 | -0.042671 | -0.04601 | 0.485675 | 0.0 | 0.564197 | 0.0 |
| 2013 | CBME Milestones (ACGME) | 7 | Poisson-HC1 | -0.001722 | -0.053024 | -0.001617 | 0.324585 | 0.868012 | 0.40108 | 0.890975 |
| 2013 | CBME Milestones (ACGME) | 8 | Poisson-HC1 | -0.019753 | -0.139783 | -0.018377 | 0.026245 | 0.115863 | 0.050662 | 0.179103 |
| 2013 | CBME Milestones (ACGME) | 9 | Poisson-HC1 | -0.011559 | 0.062196 | 0.051783 | 0.219244 | 0.0 | 0.292325 | 0.0 |
| 2013 | CBME Milestones (ACGME) | 10 | Poisson-HC1 | 0.048276 | 0.134073 | -0.070537 | 0.004156 | 0.0 | 0.009893 | 0.0 |
| 2013 | CBME Milestones (ACGME) | 11 | Poisson-HC1 | 0.007776 | -0.125264 | -0.029171 | 0.00246 | 5e-06 | 0.006079 | 2.3e-05 |
| 2013 | CBME Milestones (ACGME) | 12 | Poisson-HC1 | -0.019708 | 0.153453 | 0.074529 | 0.063572 | 1e-06 | 0.109141 | 6e-06 |
| 2013 | CBME Milestones (ACGME) | 13 | Poisson-HC1 | 0.009871 | 0.083925 | 0.011211 | 0.041987 | 0.189068 | 0.075074 | 0.261062 |
| 2013 | CBME Milestones (ACGME) | 14 | Poisson-HC1 | 0.037376 | -0.172418 | 0.009521 | 0.065706 | 0.500678 | 0.112308 | 0.57989 |
| 2013 | CBME Milestones (ACGME) | 15 | Poisson-HC1 | -0.019687 | 0.307953 | 0.001646 | 0.000205 | 0.877223 | 0.00068 | 0.898054 |
| 2013 | CBME Milestones (ACGME) | 16 | Poisson-HC1 | -7e-06 | -0.873042 | 0.231868 | 0.00706 | 0.0 | 0.016403 | 0.0 |
| 2013 | CBME Milestones (ACGME) | 17 | Poisson | -0.038371 | 0.036747 | 0.035356 | 0.569607 | 5.9e-05 | 0.642464 | 0.000214 |
| 2013 | CBME Milestones (ACGME) | 18 | Poisson-HC1 | -0.029816 | -0.098221 | -0.009416 | 0.220024 | 0.416257 | 0.292361 | 0.495422 |
| 2013 | CBME Milestones (ACGME) | 19 | Poisson-HC1 | 0.047389 | 0.119718 | -0.065686 | 0.199264 | 5.2e-05 | 0.272234 | 0.000192 |
| 2013 | CBME Milestones (ACGME) | 20 | Poisson | -0.023326 | -0.023652 | 0.04128 | 0.730167 | 1.2e-05 | 0.774057 | 5e-05 |
| 2013 | CBME Milestones (ACGME) | 21 | Poisson-HC1 | -0.041452 | 0.027291 | 0.064645 | 0.639775 | 0.0 | 0.698834 | 0.0 |
| 2013 | CBME Milestones (ACGME) | 22 | Poisson-HC1 | 0.00883 | 0.192696 | -0.042414 | 0.000143 | 1e-06 | 0.000487 | 6e-06 |
| 2013 | CBME Milestones (ACGME) | 23 | Poisson-HC1 | -0.016078 | -0.049114 | -0.020753 | 0.530395 | 0.22167 | 0.607479 | 0.29242 |
| 2013 | CBME Milestones (ACGME) | 24 | Poisson | -0.015379 | 0.225716 | 0.005945 | 0.000883 | 0.533893 | 0.002407 | 0.607479 |
| 2013 | CBME Milestones (ACGME) | 25 | Poisson-HC1 | 0.02987 | -0.079967 | 0.063178 | 0.435725 | 2e-06 | 0.515431 | 1e-05 |
| 2013 | CBME Milestones (ACGME) | 26 | Poisson-HC1 | -0.019658 | -0.050576 | -0.023078 | 0.653056 | 0.254212 | 0.707003 | 0.324455 |
| 2013 | CBME Milestones (ACGME) | 27 | Poisson-HC1 | -0.010231 | -0.165649 | 0.014021 | 0.478818 | 0.647986 | 0.559582 | 0.704254 |
| 2013 | CBME Milestones (ACGME) | 28 | Poisson-HC1 | -0.005052 | 0.126145 | -0.012695 | 0.259998 | 0.358967 | 0.329671 | 0.439367 |
| 2013 | CBME Milestones (ACGME) | 29 | Poisson | 0.080593 | 0.258185 | -0.044542 | 0.024409 | 0.017049 | 0.048075 | 0.034816 |
| 2013 | CBME Milestones (ACGME) | 30 | Poisson-HC1 | -0.014965 | 0.129346 | 0.01088 | 0.241336 | 0.403673 | 0.312128 | 0.481923 |
| 2013 | CBME Milestones (ACGME) | 31 | Poisson | -0.037544 | 0.224249 | 0.054785 | 0.051938 | 0.000455 | 0.090775 | 0.001358 |
| 2013 | CBME Milestones (ACGME) | 32 | Poisson-HC1 | 0.020343 | -0.151877 | -0.088151 | 0.101739 | 5e-06 | 0.161121 | 2.3e-05 |
| 2013 | CBME Milestones (ACGME) | 33 | Poisson | -0.075456 | -0.178538 | 0.004242 | 0.205658 | 0.829924 | 0.278032 | 0.858857 |
| 2013 | CBME Milestones (ACGME) | 34 | Poisson-HC1 | -0.050387 | -0.394042 | 0.232455 | 0.125836 | 0.0 | 0.19072 | 0.0 |
| 2013 | CBME Milestones (ACGME) | 35 | Poisson | -0.07608 | 0.111614 | 0.09101 | 0.572139 | 0.000383 | 0.643449 | 0.001189 |
| 2013 | CBME Milestones (ACGME) | 36 | Poisson-HC1 | -0.0205 | 0.539282 | -0.095083 | 0.076633 | 0.052296 | 0.127067 | 0.09099 |
| 2013 | CBME Milestones (ACGME) | 37 | Poisson | -0.062016 | 0.015688 | 0.013978 | 0.944954 | 0.65416 | 0.94985 | 0.707003 |
| 2013 | CBME Milestones (ACGME) | 38 | Poisson-HC1 | 0.248115 | -0.597225 | -0.437909 | 0.049276 | 0.0 | 0.086512 | 0.0 |
| 2020 | COVID-19 Pandemic | 0 | Poisson-HC1 | -0.007385 | -0.113394 | -0.011759 | 0.031462 | 0.458024 | 0.058689 | 0.540162 |
| 2020 | COVID-19 Pandemic | 1 | Poisson-HC1 | 0.01226 | -0.35244 | 0.025831 | 2e-05 | 0.217527 | 8.1e-05 | 0.291036 |
| 2020 | COVID-19 Pandemic | 2 | Poisson-HC1 | -0.006564 | 0.828833 | -0.115639 | 0.0 | 0.002199 | 0.0 | 0.005505 |
| 2020 | COVID-19 Pandemic | 3 | Poisson-HC1 | 0.019594 | -0.238354 | 0.003709 | 0.0 | 0.715009 | 0.0 | 0.764252 |
| 2020 | COVID-19 Pandemic | 4 | Poisson-HC1 | 0.005886 | -0.258418 | 0.004879 | 0.0 | 0.748836 | 0.0 | 0.789534 |
| 2020 | COVID-19 Pandemic | 5 | Poisson-HC1 | -0.024969 | -0.277375 | 0.065708 | 0.0 | 0.0 | 0.0 | 0.0 |
| 2020 | COVID-19 Pandemic | 6 | Poisson-HC1 | 0.011395 | -0.102399 | -0.044862 | 0.000941 | 0.0 | 0.002535 | 0.0 |
| 2020 | COVID-19 Pandemic | 7 | Poisson-HC1 | -0.007178 | -0.091539 | 0.039055 | 0.112996 | 0.000192 | 0.176784 | 0.000642 |
| 2020 | COVID-19 Pandemic | 8 | Poisson-HC1 | -0.031824 | -0.275834 | 0.050711 | 0.001202 | 0.067315 | 0.003151 | 0.114554 |
| 2020 | COVID-19 Pandemic | 9 | Poisson-HC1 | 0.012297 | 0.261097 | -0.02256 | 0.00143 | 0.010671 | 0.003699 | 0.022875 |
| 2020 | COVID-19 Pandemic | 10 | Poisson-HC1 | 0.037842 | -0.275712 | -0.054317 | 0.0 | 0.0 | 0.0 | 0.0 |
| 2020 | COVID-19 Pandemic | 11 | Poisson-HC1 | -0.0111 | -0.045642 | -0.017009 | 0.262012 | 0.133695 | 0.331142 | 0.200284 |
| 2020 | COVID-19 Pandemic | 12 | Poisson-HC1 | 0.013532 | 0.45514 | -0.032209 | 0.000294 | 0.308064 | 0.000959 | 0.381881 |
| 2020 | COVID-19 Pandemic | 13 | Poisson | 0.017992 | 0.13693 | -0.025144 | 0.000388 | 0.010085 | 0.001195 | 0.02209 |
| 2020 | COVID-19 Pandemic | 14 | Poisson-HC1 | 0.022798 | 0.143274 | 0.012194 | 0.090513 | 0.58814 | 0.145722 | 0.659533 |
| 2020 | COVID-19 Pandemic | 15 | Poisson-HC1 | 0.008183 | -0.09263 | -0.026924 | 0.04019 | 0.002361 | 0.072868 | 0.005872 |
| 2020 | COVID-19 Pandemic | 16 | Poisson-HC1 | 0.020925 | -0.337857 | 0.427376 | 0.010254 | 0.0 | 0.022103 | 0.0 |
| 2020 | COVID-19 Pandemic | 17 | Poisson | -0.021509 | -0.066894 | 0.053227 | 0.276378 | 0.000849 | 0.345918 | 0.00237 |
| 2020 | COVID-19 Pandemic | 18 | Poisson-HC1 | -0.040215 | -0.143246 | 0.047361 | 0.004514 | 5.6e-05 | 0.010679 | 0.000205 |
| 2020 | COVID-19 Pandemic | 19 | Poisson-HC1 | 0.031885 | 0.136356 | -0.153878 | 0.014836 | 0.0 | 0.030783 | 0.0 |
| 2020 | COVID-19 Pandemic | 20 | Poisson-HC1 | -0.010768 | 0.089577 | 0.030468 | 0.188498 | 0.00058 | 0.261062 | 0.001718 |
| 2020 | COVID-19 Pandemic | 21 | Poisson-HC1 | -0.018223 | 0.075073 | 0.067236 | 0.325963 | 6e-06 | 0.401504 | 2.7e-05 |
| 2020 | COVID-19 Pandemic | 22 | Poisson-HC1 | 0.010915 | -0.073805 | -0.073872 | 0.084039 | 4e-06 | 0.13758 | 1.9e-05 |
| 2020 | COVID-19 Pandemic | 23 | Poisson-HC1 | -0.02225 | -0.284198 | 0.040442 | 0.110503 | 0.504923 | 0.174289 | 0.583066 |
| 2020 | COVID-19 Pandemic | 24 | Poisson | 0.009588 | -0.085177 | -0.024575 | 0.149435 | 0.117894 | 0.217019 | 0.181519 |
| 2020 | COVID-19 Pandemic | 25 | Poisson | 0.037549 | 0.320449 | 0.040968 | 0.0 | 0.000669 | 0.0 | 0.001952 |
| 2020 | COVID-19 Pandemic | 26 | Poisson-HC1 | -0.026489 | -0.250448 | 0.024493 | 0.143656 | 0.592836 | 0.211131 | 0.661817 |
| 2020 | COVID-19 Pandemic | 27 | Poisson-HC1 | -0.017695 | 0.218282 | -0.03727 | 0.07395 | 0.149249 | 0.123675 | 0.217019 |
| 2020 | COVID-19 Pandemic | 28 | Poisson | 0.006537 | 0.008547 | -0.077958 | 0.911194 | 0.000237 | 0.927935 | 0.000779 |
| 2020 | COVID-19 Pandemic | 29 | Poisson | 0.090373 | -0.1861 | -0.063889 | 0.017276 | 0.001099 | 0.035095 | 0.002921 |
| 2020 | COVID-19 Pandemic | 30 | Poisson-HC1 | 0.007167 | 0.018389 | -0.059317 | 0.830081 | 0.0 | 0.858857 | 0.0 |
| 2020 | COVID-19 Pandemic | 31 | Poisson | -0.00709 | 0.153357 | 0.032521 | 0.113823 | 0.179039 | 0.177363 | 0.252608 |
| 2020 | COVID-19 Pandemic | 32 | Poisson-HC1 | -0.018887 | -0.271922 | -0.032669 | 0.005455 | 0.071003 | 0.012828 | 0.119779 |
| 2020 | COVID-19 Pandemic | 33 | Poisson | -0.083858 | -0.261827 | 0.091916 | 0.146301 | 0.070904 | 0.214207 | 0.119779 |
| 2020 | COVID-19 Pandemic | 34 | Poisson-HC1 | -0.007316 | 0.432574 | 0.252405 | 0.019881 | 0.0 | 0.039762 | 0.0 |
| 2020 | COVID-19 Pandemic | 35 | Poisson | -0.041697 | 0.056731 | 0.119077 | 0.760928 | 0.010185 | 0.800109 | 0.02209 |
| 2020 | COVID-19 Pandemic | 36 | Poisson-HC1 | 0.00175 | 0.21064 | -0.493689 | 0.253419 | 1e-06 | 0.324455 | 6e-06 |
| 2020 | COVID-19 Pandemic | 37 | Poisson | -0.053966 | -0.320292 | 0.107938 | 0.222206 | 0.125681 | 0.29242 | 0.19072 |
| 2020 | COVID-19 Pandemic | 38 | Poisson-HC1 | 0.032574 | -0.224074 | -0.817463 | 0.641198 | 0.009703 | 0.698834 | 0.021513 |
| 2021 | USMLE Step 1 Pass/Fail | 0 | Poisson-HC1 | -0.009041 | -0.125614 | -0.002206 | 0.038533 | 0.927044 | 0.070523 | 0.938189 |
| 2021 | USMLE Step 1 Pass/Fail | 1 | Poisson-HC1 | 0.007608 | -0.367683 | 0.065013 | 1.3e-05 | 0.001227 | 5.4e-05 | 0.003195 |
| 2021 | USMLE Step 1 Pass/Fail | 2 | Poisson-HC1 | 0.009494 | 0.686846 | -0.201698 | 1.2e-05 | 0.0 | 5e-05 | 0.0 |
| 2021 | USMLE Step 1 Pass/Fail | 3 | Poisson-HC1 | 0.015506 | -0.221433 | 0.02079 | 8e-06 | 0.046158 | 3.4e-05 | 0.081406 |
| 2021 | USMLE Step 1 Pass/Fail | 4 | Poisson-HC1 | 0.002189 | -0.265083 | 0.029204 | 0.000128 | 0.11576 | 0.00044 | 0.179103 |
| 2021 | USMLE Step 1 Pass/Fail | 5 | Poisson-HC1 | -0.028856 | -0.183919 | 0.078037 | 0.001556 | 0.0 | 0.003998 | 0.0 |
| 2021 | USMLE Step 1 Pass/Fail | 6 | Poisson-HC1 | 0.009334 | -0.125653 | -0.041366 | 0.000835 | 0.000336 | 0.002348 | 0.00106 |
| 2021 | USMLE Step 1 Pass/Fail | 7 | Poisson-HC1 | -0.008047 | -0.077846 | 0.052809 | 0.141282 | 0.0 | 0.209227 | 0.0 |
| 2021 | USMLE Step 1 Pass/Fail | 8 | Poisson-HC1 | -0.034117 | -0.307297 | 0.092884 | 2.8e-05 | 7.3e-05 | 0.000109 | 0.00026 |
| 2021 | USMLE Step 1 Pass/Fail | 9 | Poisson-HC1 | 0.017962 | 0.192927 | -0.036889 | 0.008793 | 3e-06 | 0.019721 | 1.5e-05 |
| 2021 | USMLE Step 1 Pass/Fail | 10 | Poisson-HC1 | 0.032155 | -0.288488 | -0.039446 | 1e-06 | 0.0 | 6e-06 | 0.0 |
| 2021 | USMLE Step 1 Pass/Fail | 11 | Poisson-HC1 | -0.011636 | -0.070548 | -0.011058 | 0.111688 | 0.511074 | 0.175445 | 0.588418 |
| 2021 | USMLE Step 1 Pass/Fail | 12 | Poisson-HC1 | 0.020846 | 0.454769 | -0.084207 | 0.000174 | 0.0072 | 0.000587 | 0.016629 |
| 2021 | USMLE Step 1 Pass/Fail | 13 | Poisson | 0.019709 | 0.140439 | -0.044872 | 0.000308 | 0.00036 | 0.000988 | 0.001126 |
| 2021 | USMLE Step 1 Pass/Fail | 14 | Poisson-HC1 | 0.023999 | 0.206604 | -0.012343 | 0.007278 | 0.628885 | 0.016709 | 0.692446 |
| 2021 | USMLE Step 1 Pass/Fail | 15 | Poisson-HC1 | 0.005445 | -0.051814 | -0.036459 | 0.247524 | 0.0 | 0.319067 | 0.0 |
| 2021 | USMLE Step 1 Pass/Fail | 16 | Poisson-HC1 | 0.016898 | 0.081366 | 0.448569 | 0.532628 | 0.0 | 0.607479 | 0.0 |
| 2021 | USMLE Step 1 Pass/Fail | 17 | Poisson | -0.022901 | 0.014611 | 0.051104 | 0.817204 | 0.013287 | 0.85465 | 0.028018 |
| 2021 | USMLE Step 1 Pass/Fail | 18 | Poisson-HC1 | -0.041764 | -0.109163 | 0.061221 | 0.008692 | 0.0 | 0.019608 | 0.0 |
| 2021 | USMLE Step 1 Pass/Fail | 19 | Poisson-HC1 | 0.034314 | -0.005853 | -0.172046 | 0.942342 | 0.0 | 0.949685 | 0.0 |
| 2021 | USMLE Step 1 Pass/Fail | 20 | Poisson-HC1 | -0.008304 | 0.063033 | 0.036986 | 0.279213 | 0.000331 | 0.348343 | 0.001053 |
| 2021 | USMLE Step 1 Pass/Fail | 21 | Poisson-HC1 | -0.017006 | 0.134187 | 0.063279 | 0.15212 | 0.014032 | 0.219415 | 0.029311 |
| 2021 | USMLE Step 1 Pass/Fail | 22 | Poisson-HC1 | 0.008735 | -0.094401 | -0.081536 | 0.133173 | 0.000393 | 0.200276 | 0.001201 |
| 2021 | USMLE Step 1 Pass/Fail | 23 | Poisson | -0.022643 | -0.493804 | 0.129783 | 0.0 | 2e-06 | 0.0 | 1e-05 |
| 2021 | USMLE Step 1 Pass/Fail | 24 | Poisson | 0.008132 | -0.105139 | -0.018231 | 0.087329 | 0.375221 | 0.141773 | 0.454955 |
| 2021 | USMLE Step 1 Pass/Fail | 25 | Poisson-HC1 | 0.044245 | 0.339845 | 0.014763 | 3.7e-05 | 0.423366 | 0.000141 | 0.502343 |
| 2021 | USMLE Step 1 Pass/Fail | 26 | Poisson-HC1 | -0.026891 | -0.442916 | 0.103393 | 2e-06 | 3e-06 | 1e-05 | 1.5e-05 |
| 2021 | USMLE Step 1 Pass/Fail | 27 | Poisson-HC1 | -0.016059 | 0.264722 | -0.078468 | 0.001984 | 0.0 | 0.004999 | 0.0 |
| 2021 | USMLE Step 1 Pass/Fail | 28 | Poisson | 0.007269 | -0.101788 | -0.069977 | 0.20852 | 0.012921 | 0.280923 | 0.027395 |
| 2021 | USMLE Step 1 Pass/Fail | 29 | Poisson | 0.086303 | -0.258154 | -0.041929 | 0.00118 | 0.093583 | 0.003115 | 0.149425 |
| 2021 | USMLE Step 1 Pass/Fail | 30 | Poisson-HC1 | 0.007886 | -0.062877 | -0.05522 | 0.38919 | 2.6e-05 | 0.46751 | 0.000102 |
| 2021 | USMLE Step 1 Pass/Fail | 31 | Poisson | -0.007759 | 0.31979 | -0.011886 | 0.000887 | 0.698462 | 0.002407 | 0.748628 |
| 2021 | USMLE Step 1 Pass/Fail | 32 | Poisson-HC1 | -0.022473 | -0.30901 | -0.010036 | 0.001868 | 0.614455 | 0.004737 | 0.679227 |
| 2021 | USMLE Step 1 Pass/Fail | 33 | Poisson | -0.08558 | -0.239069 | 0.127192 | 0.22233 | 0.060576 | 0.29242 | 0.10446 |
| 2021 | USMLE Step 1 Pass/Fail | 34 | Poisson-HC1 | 0.001644 | 0.595338 | 0.235623 | 0.003682 | 3e-06 | 0.008929 | 1.5e-05 |
| 2021 | USMLE Step 1 Pass/Fail | 35 | Poisson | -0.036672 | -0.079128 | 0.17759 | 0.690149 | 0.003823 | 0.741767 | 0.009213 |
| 2021 | USMLE Step 1 Pass/Fail | 36 | Poisson-HC1 | 0.008188 | -0.484131 | -0.438374 | 0.0457 | 0.008881 | 0.080966 | 0.019804 |
| 2021 | USMLE Step 1 Pass/Fail | 37 | Poisson | -0.058821 | -0.093559 | 0.094961 | 0.727806 | 0.294512 | 0.773668 | 0.366252 |
| 2021 | USMLE Step 1 Pass/Fail | 38 | Poisson-HC1 | 0.036307 | -3.818326 | 0.327997 | 0.0 | 0.0 | 0.0 | 0.0 |
| 2022 | ChatGPT Release | 0 | Poisson-HC1 | -0.012231 | -0.006964 | -0.036616 | 0.917377 | 0.173708 | 0.931786 | 0.246882 |
| 2022 | ChatGPT Release | 1 | Poisson-HC1 | 0.002861 | -0.33388 | 0.11226 | 5e-06 | 0.0 | 2.3e-05 | 0.0 |
| 2022 | ChatGPT Release | 2 | Poisson-HC1 | 0.026539 | 0.319355 | -0.245118 | 0.084392 | 0.0 | 0.13758 | 0.0 |
| 2022 | ChatGPT Release | 3 | Poisson-HC1 | 0.01203 | -0.192993 | 0.041414 | 0.000123 | 2e-06 | 0.000426 | 1e-05 |
| 2022 | ChatGPT Release | 4 | Poisson-HC1 | -0.001052 | -0.276674 | 0.07124 | 2.5e-05 | 3.6e-05 | 0.0001 | 0.000138 |
| 2022 | ChatGPT Release | 5 | Poisson-HC1 | -0.030894 | -0.120164 | 0.099902 | 0.091895 | 2e-06 | 0.147336 | 1e-05 |
| 2022 | ChatGPT Release | 6 | Poisson-HC1 | 0.006982 | -0.134025 | -0.040258 | 0.020477 | 0.081896 | 0.040744 | 0.135216 |
| 2022 | ChatGPT Release | 7 | Poisson-HC1 | -0.009588 | 0.009897 | 0.047677 | 0.882834 | 0.028591 | 0.90142 | 0.054379 |
| 2022 | ChatGPT Release | 8 | Poisson-HC1 | -0.037119 | -0.258544 | 0.135685 | 0.009905 | 0.00012 | 0.021836 | 0.000419 |
| 2022 | ChatGPT Release | 9 | Poisson-HC1 | 0.022509 | 0.08849 | -0.036509 | 0.177635 | 7e-06 | 0.251542 | 3.1e-05 |
| 2022 | ChatGPT Release | 10 | Poisson-HC1 | 0.02685 | -0.288252 | -0.021876 | 7e-06 | 0.002773 | 3.1e-05 | 0.00681 |
| 2022 | ChatGPT Release | 11 | Poisson-HC1 | -0.013537 | -0.005496 | -0.033545 | 0.928517 | 0.173358 | 0.938189 | 0.246882 |
| 2022 | ChatGPT Release | 12 | Poisson-HC1 | 0.028896 | 0.401012 | -0.157414 | 0.0003 | 0.0 | 0.00097 | 0.0 |
| 2022 | ChatGPT Release | 13 | Poisson | 0.022227 | 0.091616 | -0.06077 | 0.025254 | 0.000706 | 0.049239 | 0.002029 |
| 2022 | ChatGPT Release | 14 | Poisson-HC1 | 0.026742 | 0.243662 | -0.05499 | 3e-06 | 0.001855 | 1.5e-05 | 0.004735 |
| 2022 | ChatGPT Release | 15 | Poisson-HC1 | 0.004358 | -0.066313 | -0.039143 | 0.119411 | 0.0 | 0.183128 | 0.0 |
| 2022 | ChatGPT Release | 16 | Poisson-HC1 | 0.019882 | 0.462335 | 0.457686 | 0.000871 | 0.0 | 0.002405 | 0.0 |
| 2022 | ChatGPT Release | 17 | Poisson | -0.022992 | 0.087702 | 0.041436 | 0.188761 | 0.156153 | 0.261062 | 0.224398 |
| 2022 | ChatGPT Release | 18 | Poisson-HC1 | -0.043109 | -0.037698 | 0.066802 | 0.364903 | 0.0 | 0.445228 | 0.0 |
| 2022 | ChatGPT Release | 19 | Poisson-HC1 | 0.032237 | -0.044164 | -0.225949 | 0.249273 | 0.0 | 0.320258 | 0.0 |
| 2022 | ChatGPT Release | 20 | Poisson-HC1 | -0.007224 | 0.088257 | 0.034649 | 0.14229 | 0.071715 | 0.209918 | 0.120456 |
| 2022 | ChatGPT Release | 21 | Poisson-HC1 | -0.016785 | 0.304273 | 0.011284 | 2.6e-05 | 0.599568 | 0.000102 | 0.666568 |
| 2022 | ChatGPT Release | 22 | Poisson-HC1 | 0.005681 | -0.051823 | -0.120551 | 0.484178 | 9e-06 | 0.564147 | 3.8e-05 |
| 2022 | ChatGPT Release | 23 | Poisson | -0.026738 | -0.526554 | 0.231695 | 0.0 | 0.0 | 0.0 | 0.0 |
| 2022 | ChatGPT Release | 24 | Poisson | 0.005615 | -0.055177 | -0.032774 | 0.398075 | 0.263045 | 0.476707 | 0.331368 |
| 2022 | ChatGPT Release | 25 | Poisson-HC1 | 0.056121 | 0.142827 | 0.036084 | 0.192176 | 0.000776 | 0.264412 | 0.002214 |
| 2022 | ChatGPT Release | 26 | Poisson-HC1 | -0.03301 | -0.207857 | 0.088168 | 0.139487 | 0.044942 | 0.20736 | 0.079989 |
| 2022 | ChatGPT Release | 27 | Poisson-HC1 | -0.010606 | 0.081517 | -0.068556 | 0.475727 | 0.01818 | 0.558888 | 0.036739 |
| 2022 | ChatGPT Release | 28 | Poisson | 0.005963 | -0.193473 | -0.04982 | 0.030352 | 0.225138 | 0.057168 | 0.29412 |
| 2022 | ChatGPT Release | 29 | Poisson-HC1 | 0.077451 | -0.1382 | -0.06378 | 0.130233 | 0.030929 | 0.196616 | 0.057973 |
| 2022 | ChatGPT Release | 30 | Poisson-HC1 | 0.006415 | -0.080629 | -0.06272 | 0.353372 | 0.018417 | 0.433887 | 0.037025 |
| 2022 | ChatGPT Release | 31 | Poisson | -0.00306 | 0.326556 | -0.055916 | 0.001029 | 0.197918 | 0.002753 | 0.27135 |
| 2022 | ChatGPT Release | 32 | Poisson-HC1 | -0.025915 | -0.352918 | 0.032387 | 0.000801 | 0.205533 | 0.002269 | 0.278032 |
| 2022 | ChatGPT Release | 33 | Poisson | -0.087022 | -0.189324 | 0.174734 | 0.385259 | 0.074718 | 0.464225 | 0.124423 |
| 2022 | ChatGPT Release | 34 | Poisson-HC1 | 0.007866 | 0.931498 | 0.149577 | 0.0 | 0.0 | 0.0 | 0.0 |
| 2022 | ChatGPT Release | 35 | Poisson | -0.036861 | 0.040446 | 0.204875 | 0.846062 | 0.016912 | 0.873064 | 0.034719 |
| 2022 | ChatGPT Release | 36 | Poisson-HC1 | -0.002066 | -0.419332 | -0.675335 | 0.031846 | 0.007411 | 0.059121 | 0.016915 |
| 2022 | ChatGPT Release | 37 | Poisson | -0.058798 | -0.105407 | 0.144271 | 0.723161 | 0.271341 | 0.770842 | 0.340713 |
| 2022 | ChatGPT Release | 38 | Poisson-HC1 | 0.012487 | -3.338425 | 0.411901 | 0.0 | 0.0 | 0.0 | 0.0 |

## **Supplementary Table S8. Compound event ITS coefficients with within-pool FDR correction**

| event_year | event_name | topic_id | model_type | beta_level_change | beta_slope_change | p_level_change | p_slope_change | p_level_fdr | p_slope_fdr |
| --- | --- | --- | --- | --- | --- | --- | --- | --- | --- |
| 2020 | Compound Disruption (COVID+Step1+ChatGPT) | 0 | Poisson-HC1 | -0.11339417449520095 | -0.011758645302860193 | 0.03146236537646219 | 0.45802432741457966 | 0.05843010712771549 | 0.5177666309903944 |
| 2020 | Compound Disruption (COVID+Step1+ChatGPT) | 1 | Poisson-HC1 | -0.3524396886960466 | 0.025831195010243446 | 2.040039927545459e-05 | 0.21752749537266303 | 9.360183196973281e-05 | 0.27366362321076965 |
| 2020 | Compound Disruption (COVID+Step1+ChatGPT) | 2 | Poisson-HC1 | 0.8288330790008547 | -0.11563880612536648 | 2.2072207151564643e-10 | 0.0021994159993850965 | 2.0970060320075933e-09 | 0.0057184815984012505 |
| 2020 | Compound Disruption (COVID+Step1+ChatGPT) | 3 | Poisson-HC1 | -0.23835395059197562 | 0.0037092475190401153 | 2.4196223446241464e-10 | 0.7150090961672437 | 2.0970060320075933e-09 | 0.7536582365006083 |
| 2020 | Compound Disruption (COVID+Step1+ChatGPT) | 4 | Poisson-HC1 | -0.2584175070652932 | 0.004878960721814596 | 4.752533133238431e-07 | 0.7488364269174347 | 2.851519879943059e-06 | 0.7787898839941321 |
| 2020 | Compound Disruption (COVID+Step1+ChatGPT) | 5 | Poisson-HC1 | -0.27737461345398595 | 0.06570815686527742 | 8.447910781462235e-19 | 8.572300287168942e-14 | 2.196456803180181e-17 | 1.1143990373319624e-12 |
| 2020 | Compound Disruption (COVID+Step1+ChatGPT) | 6 | Poisson-HC1 | -0.10239911674755175 | -0.04486209352783688 | 0.000940542194527923 | 2.0816150569816945e-08 | 0.0028216265835837692 | 1.4760543131324743e-07 |
| 2020 | Compound Disruption (COVID+Step1+ChatGPT) | 7 | Poisson-HC1 | -0.09153947537769969 | 0.039055092741791975 | 0.1129957991056506 | 0.0001921683261948603 | 0.17073522940155944 | 0.000788901549642058 |
| 2020 | Compound Disruption (COVID+Step1+ChatGPT) | 8 | Poisson-HC1 | -0.2758342417538717 | 0.05071077305274285 | 0.0012021240893145895 | 0.06731524469551645 | 0.003348774248804928 | 0.11933157014205188 |
| 2020 | Compound Disruption (COVID+Step1+ChatGPT) | 9 | Poisson-HC1 | 0.2610970597919846 | -0.022559937396665952 | 0.0014302404819117986 | 0.010670794626534842 | 0.003846853709969665 | 0.02190321002288731 |
| 2020 | Compound Disruption (COVID+Step1+ChatGPT) | 10 | Poisson-HC1 | -0.2757118997120124 | -0.05431686706504335 | 3.214702966417553e-11 | 2.2660431549970198e-14 | 3.582097591150988e-10 | 3.535027321795351e-13 |
| 2020 | Compound Disruption (COVID+Step1+ChatGPT) | 11 | Poisson-HC1 | -0.045642278563932104 | -0.017009495490172943 | 0.26201193257188793 | 0.1336954564946388 | 0.3144143190862655 | 0.189604465574215 |
| 2020 | Compound Disruption (COVID+Step1+ChatGPT) | 12 | Poisson-HC1 | 0.4551402869628347 | -0.0322088057866915 | 0.0002936748923836179 | 0.3080641275770787 | 0.0010907924574248666 | 0.3586418201643603 |
| 2020 | Compound Disruption (COVID+Step1+ChatGPT) | 13 | Poisson | 0.1369304136933267 | -0.025144035567671974 | 0.000387514656933022 | 0.010085423378238681 | 0.0013739156018534417 | 0.021616729452289405 |
| 2020 | Compound Disruption (COVID+Step1+ChatGPT) | 14 | Poisson-HC1 | 0.1432742737371121 | 0.012194208916782912 | 0.0905134459756427 | 0.5881403486547414 | 0.14408262828775778 | 0.6422389603118444 |
| 2020 | Compound Disruption (COVID+Step1+ChatGPT) | 15 | Poisson-HC1 | -0.09262952371583322 | -0.026923658266189032 | 0.04019008783715908 | 0.0023614642697217057 | 0.07290295003019553 | 0.005941748807686872 |
| 2020 | Compound Disruption (COVID+Step1+ChatGPT) | 16 | Poisson-HC1 | -0.33785713215176494 | 0.42737583665754286 | 0.010254089611983435 | 1.0036678855251614e-74 | 0.021616729452289405 | 7.828609507096259e-73 |
| 2020 | Compound Disruption (COVID+Step1+ChatGPT) | 17 | Poisson | -0.06689406784030227 | 0.0532268591349383 | 0.2763782524674482 | 0.0008489696449987221 | 0.32662884382516605 | 0.0026487852923960126 |
| 2020 | Compound Disruption (COVID+Step1+ChatGPT) | 18 | Poisson-HC1 | -0.14324582991899126 | 0.04736054546025159 | 0.004514241305345425 | 5.579112593592384e-05 | 0.011003463181779473 | 0.00024176154572233663 |
| 2020 | Compound Disruption (COVID+Step1+ChatGPT) | 19 | Poisson-HC1 | 0.1363562339849237 | -0.15387803824055069 | 0.014835885390904543 | 4.9287010693523195e-29 | 0.029671770781809086 | 1.9221934170474046e-27 |
| 2020 | Compound Disruption (COVID+Step1+ChatGPT) | 20 | Poisson-HC1 | 0.08957737075763716 | 0.030467807706393568 | 0.1884982805739338 | 0.000580156802209944 | 0.24103058827486618 | 0.001967488285755462 |
| 2020 | Compound Disruption (COVID+Step1+ChatGPT) | 21 | Poisson-HC1 | 0.07507282403776039 | 0.0672357809804347 | 0.32596327338574826 | 5.61709777769868e-06 | 0.37389904888365244 | 2.7383351666281065e-05 |
| 2020 | Compound Disruption (COVID+Step1+ChatGPT) | 22 | Poisson-HC1 | -0.07380522360544006 | -0.07387206896295162 | 0.08403933349046117 | 3.7407531378370443e-06 | 0.13656391692199937 | 1.945191631675263e-05 |
| 2020 | Compound Disruption (COVID+Step1+ChatGPT) | 23 | Poisson-HC1 | -0.28419832834019165 | 0.04044244901205962 | 0.11050270975365471 | 0.5049231796089617 | 0.17073522940155944 | 0.5626286858499859 |
| 2020 | Compound Disruption (COVID+Step1+ChatGPT) | 24 | Poisson | -0.08517653089019916 | -0.024575399477691717 | 0.14943469362257927 | 0.117894389065978 | 0.19755773055188447 | 0.1735049499461563 |
| 2020 | Compound Disruption (COVID+Step1+ChatGPT) | 25 | Poisson | 0.3204491506961765 | 0.0409682641731558 | 2.2163862947544934e-09 | 0.0006690421080017086 | 1.728781309908505e-08 | 0.002174386851005553 |
| 2020 | Compound Disruption (COVID+Step1+ChatGPT) | 26 | Poisson-HC1 | -0.25044799230229553 | 0.024492986539818462 | 0.14365590508614662 | 0.5928359633647794 | 0.19755773055188447 | 0.6422389603118444 |
| 2020 | Compound Disruption (COVID+Step1+ChatGPT) | 27 | Poisson-HC1 | 0.21828177003428217 | -0.037270394885950076 | 0.07394973034579286 | 0.1492493392345226 | 0.12272508440365625 | 0.19755773055188447 |
| 2020 | Compound Disruption (COVID+Step1+ChatGPT) | 28 | Poisson | 0.008546895042577995 | -0.07795820704849987 | 0.9111936715389893 | 0.00023745601356470224 | 0.9111936715389893 | 0.0009260784529023388 |
| 2020 | Compound Disruption (COVID+Step1+ChatGPT) | 29 | Poisson | -0.18609997869741512 | -0.06388872485117347 | 0.017276490001170756 | 0.0010993265739543058 | 0.03368915550228298 | 0.0031758323247568837 |
| 2020 | Compound Disruption (COVID+Step1+ChatGPT) | 30 | Poisson-HC1 | 0.018388897958511397 | -0.05931739463695962 | 0.8300806397350456 | 9.170451617399868e-08 | 0.8408609077835527 | 5.960793551309914e-07 |
| 2020 | Compound Disruption (COVID+Step1+ChatGPT) | 31 | Poisson | 0.15335660884715163 | 0.03252116460855814 | 0.11382348626770629 | 0.1790389959397335 | 0.17073522940155944 | 0.23275069472165352 |
| 2020 | Compound Disruption (COVID+Step1+ChatGPT) | 32 | Poisson-HC1 | -0.27192167305322257 | -0.032668603055604706 | 0.005454623350506408 | 0.07100339123127186 | 0.012892746101196966 | 0.12039705469650445 |
| 2020 | Compound Disruption (COVID+Step1+ChatGPT) | 33 | Poisson | -0.26182707429655006 | 0.09191567317371763 | 0.14630082867967567 | 0.07090387976963392 | 0.19755773055188447 | 0.12039705469650445 |
| 2020 | Compound Disruption (COVID+Step1+ChatGPT) | 34 | Poisson-HC1 | 0.43257405008632843 | 0.2524047315749003 | 0.019880887203052113 | 1.0194932003143555e-14 | 0.03782217565458695 | 1.9880117406129931e-13 |
| 2020 | Compound Disruption (COVID+Step1+ChatGPT) | 35 | Poisson | 0.056731372340305786 | 0.11907695615594815 | 0.7609275581669568 | 0.010185493182935572 | 0.780951967592403 | 0.021616729452289405 |
| 2020 | Compound Disruption (COVID+Step1+ChatGPT) | 36 | Poisson-HC1 | 0.21064038003322672 | -0.4936891006992532 | 0.2534189081795579 | 1.229643860650243e-06 | 0.3088542943438362 | 6.8508729379084965e-06 |
| 2020 | Compound Disruption (COVID+Step1+ChatGPT) | 37 | Poisson | -0.3202921712213087 | 0.10793772174699434 | 0.22220583962738116 | 0.12568070007907656 | 0.2751119919196148 | 0.18153878900311057 |
| 2020 | Compound Disruption (COVID+Step1+ChatGPT) | 38 | Poisson-HC1 | -0.22407440657258204 | -0.8174625446224175 | 0.6411975570504876 | 0.009702875816805663 | 0.6851151979443566 | 0.021616729452289405 |

## **Supplementary Table S9. Aggregate quality indices for the BERTopic versus LDA comparison (topic diversity, perplexity, outlier and low-confidence assignment proportions; descriptive only — the indices are not commensurable across model families)**

| model | n_topics | coherence_cv | topic_diversity | perplexity | outlier_pct | low_conf_pct_010 | low_conf_pct_025 |
| --- | --- | --- | --- | --- | --- | --- | --- |
| BERTopic | 39 |  | 0.3821 |  | 0.0702 |  |  |
| LDA | 39 |  | 0.7103 | 1968.9 |  | 0.0001 | 0.1877 |

## **Supplementary Table S10. Trend re-classification with Topic 0 excluded from the model pool and offset denominator, under the primary Newey-West HAC specification (no substantive classification changed)**

| topic_id | beta | se_hac | p_hac | p_hac_fdr | classification_no0_hac | classification | label | changed_vs_primary_hac |
| --- | --- | --- | --- | --- | --- | --- | --- | --- |
| 1 | -0.005061189552669102 | 0.006578827577669913 | 0.4417064415731322 | 0.5524301813241688 | Stable | Stable | T1: Surgical skills training | False |
| 2 | 0.02737843379191686 | 0.010404360279484347 | 0.008502426402233976 | 0.015385343013566241 | Hot | Hot | T2: Student learning and pedagogy | False |
| 3 | 0.0051041415375747 | 0.0049901684979574 | 0.30638373032164457 | 0.4312067315637961 | Stable | Stable | T3: Simulation-based education | False |
| 4 | -0.008943681794347859 | 0.004624099139431496 | 0.05309520770708631 | 0.08772251708127304 | Stable | Stable | T4: Clinical imaging and ultrasound | False |
| 5 | -0.032679707590630276 | 0.0033736313080100517 | 0.0 | 0.0 | Cold | Cold | T5: Nursing education | False |
| 6 | 6.590385404637744e-05 | 0.004382749382097101 | 0.988002579780551 | 0.988002579780551 | Stable | Stable | T6: Pharmacy education | False |
| 7 | -0.00923395129090295 | 0.0029746091033884528 | 0.0019075751864099377 | 0.004027103171309869 | Cold | Cold | T7: Dental education | False |
| 8 | -0.041743698175679946 | 0.004747074073332309 | 0.0 | 0.0 | Cold | Cold | T8: Nutrition and public health | False |
| 9 | 0.02252389631624847 | 0.005091097382589899 | 9.681235473735228e-06 | 2.4525796533462577e-05 | Hot | Hot | T9: Burnout and wellbeing | False |
| 10 | 0.013745922042555994 | 0.007577765429191329 | 0.06968066049487476 | 0.11032771245021837 | Stable | Stable | T10: Interprofessional education | False |
| 11 | -0.01565574191316771 | 0.0025558904306205504 | 9.04803787449282e-10 | 3.438254392307272e-09 | Cold | Cold | T11: Medical professionalism | False |
| 12 | 0.03788642709534627 | 0.009292443446184429 | 4.559654004698821e-05 | 0.000108291782611597 | Hot | Hot | T12: Diversity and equity | False |
| 13 | 0.021242206362641937 | 0.002085195651580227 | 0.0 | 0.0 | Hot | Hot | T13: Surgical residency programs | False |
| 14 | 0.03409550552578262 | 0.004361865975852836 | 5.329070518200751e-15 | 2.2500519965736508e-14 | Hot | Hot | T14: Vaccination education | False |
| 15 | -0.0009348038302654301 | 0.004819593185697105 | 0.8462079276892791 | 0.9187400357769316 | Stable | Stable | T15: Feedback and residency training | False |
| 16 | 0.08267867044634743 | 0.02997741421107159 | 0.005815048863708094 | 0.011371134768713986 | Hot | Hot | T16: AI and ChatGPT | False |
| 17 | -0.019264873978284656 | 0.003998804489977595 | 1.4525278111410245e-06 | 4.245850524873764e-06 | Cold | Cold | T17: Palliative care and oncology | False |
| 18 | -0.04382412922168575 | 0.0030335268968508223 | 0.0 | 0.0 | Cold | Cold | T18: Psychiatry and mental health | False |
| 19 | 0.019586851972126593 | 0.0071260868439071015 | 0.005984807773007361 | 0.011371134768713986 | Hot | Hot | T19: Anatomy and dissection | False |
| 20 | -0.003515254639322067 | 0.003813777892183854 | 0.3566720078939771 | 0.46736332068865966 | Stable | Stable | T20: Cultural competence and mentoring | False |
| 21 | -0.006760037101408135 | 0.007122728677392188 | 0.3425800849036471 | 0.4649301152263782 | Stable | Stable | T21: HIV and sexual health | False |
| 22 | -0.0014098870489826362 | 0.0040581636247627615 | 0.7282758393238493 | 0.8139553498325375 | Stable | Stable | T22: Assessment and examination | False |
| 23 | -0.03604316664375375 | 0.006132445775367852 | 4.166249789605558e-09 | 1.4392499273182837e-08 | Cold | Cold | T23: Airway management | False |
| 24 | 0.0004916058038056632 | 0.003448866207379121 | 0.8866524754973917 | 0.9359109463583579 | Stable | Stable | T24: Physical therapy education | False |
| 25 | 0.06369124881621406 | 0.006881086225996303 | 0.0 | 0.0 | Hot | Hot | T25: Virtual reality simulation | False |
| 26 | -0.037899722866894324 | 0.008352758466696615 | 5.695471679834085e-06 | 1.545913741669252e-05 | Cold | Cold | T26: Geriatrics and dementia | False |
| 27 | -0.011778757670576498 | 0.008386915800852048 | 0.1601936277562237 | 0.23412914825909617 | Stable | Stable | T27: Veterinary education | False |
| 28 | -0.003002803216179215 | 0.004482184750494823 | 0.5028948497458008 | 0.5790910391012252 | Stable | Stable | T28: Antimicrobial stewardship | False |
| 29 | 0.06668466563759427 | 0.00615931249537746 | 0.0 | 0.0 | Hot | Hot | T29: Empathy and emotional intelligence | False |
| 30 | 0.0003700669718459063 | 0.004397572439859563 | 0.9329351371900487 | 0.9581496003573473 | Stable | Stable | T30: Pain management and opioids | False |
| 31 | 0.005303044735821475 | 0.007378193776947132 | 0.4722976461730908 | 0.5608534548305454 | Stable | Stable | T31: Dermatology education | False |
| 32 | -0.035695020275569256 | 0.011197735751198614 | 0.0014340932958898378 | 0.0032056203084596373 | Cold | Cold | T32: Duty hours and work restrictions | False |
| 33 | -0.08945315268969396 | 0.004303821148190936 | 0.0 | 0.0 | Cold | Cold | T33: CAM and acupuncture | False |
| 34 | 0.0676729992073599 | 0.02968549553283489 | 0.022627536579140184 | 0.03908392681851486 | Hot | Hot | T34: Climate change and health | False |
| 35 | -0.03234840151851228 | 0.00585411247349977 | 3.2806841465671255e-08 | 1.0388833130795898e-07 | Cold | Cold | T35: Spirituality and religious care | False |
| 36 | -0.02585362541703899 | 0.015703262523926145 | 0.09968439425569575 | 0.15152027926865752 | Stable | Stable | T36: JAMA specialty journals | False |
| 37 | -0.059258690159296794 | 0.005170823883377815 | 0.0 | 0.0 | Cold | Cold | T37: Tuberculosis education | False |
| 38 | -0.0297480070751103 | 0.03943769192963428 | 0.45066672686971665 | 0.5524301813241688 | Stable | Stable | T38: SE Asian medical education journals | False |

## **Supplementary Table S11. Full 39-row Poisson GLM effect sizes: beta, Newey-West HAC standard errors and FDR-adjusted p-values (primary), HC1 standard errors and FDR-adjusted p-values (sensitivity), incidence rate ratios with 95% CI, and trend classifications under both specifications**

| topic_id | label | beta | irr | se_hac | p_hac | p_hac_fdr | irr_hac_ci_lo | irr_hac_ci_hi | classification_primary_hac | se | p_glm | p_hc1_fdr | irr_ci_lo | irr_ci_hi | classification_hc1 | hac_vs_hc1_changed | model_type | deviance_ratio |
| --- | --- | --- | --- | --- | --- | --- | --- | --- | --- | --- | --- | --- | --- | --- | --- | --- | --- | --- |
| 0 | T0: General/Residual | -0.012964 | 0.9871 | 0.003163 | 4.2e-05 | 9.6e-05 | 0.981 | 0.9933 | Cold | 0.002345 | 0.0 | 0.0 | 0.9826 | 0.9917 | Cold | False | Poisson-HC1 | 7.021 |
| 1 | T1: Surgical skills training | -0.00362 | 0.9964 | 0.006354 | 0.568868 | 0.689766 | 0.9841 | 1.0089 | Stable | 0.004271 | 0.396646 | 0.483412 | 0.9881 | 1.0048 | Stable | False | Poisson-HC1 | 10.996 |
| 2 | T2: Student learning and pedagogy | 0.028961 | 1.0294 | 0.010738 | 0.006994 | 0.012989 | 1.0079 | 1.0513 | Hot | 0.008311 | 0.000493 | 0.001012 | 1.0128 | 1.0463 | Hot | False | Poisson-HC1 | 47.539 |
| 3 | T3: Simulation-based education | 0.006591 | 1.0066 | 0.004732 | 0.163691 | 0.236443 | 0.9973 | 1.016 | Stable | 0.002966 | 0.026248 | 0.039372 | 1.0008 | 1.0125 | Hot | True | Poisson-HC1 | 5.479 |
| 4 | T4: Clinical imaging and ultrasound | -0.007521 | 0.9925 | 0.004425 | 0.089239 | 0.139213 | 0.9839 | 1.0012 | Stable | 0.002869 | 0.008754 | 0.013656 | 0.9869 | 0.9981 | Cold | True | Poisson-HC1 | 5.012 |
| 5 | T5: Nursing education | -0.031368 | 0.9691 | 0.003092 | 0.0 | 0.0 | 0.9633 | 0.975 | Cold | 0.002496 | 0.0 | 0.0 | 0.9644 | 0.9739 | Cold | False | Poisson-HC1 | 3.515 |
| 6 | T6: Pharmacy education | 0.00153 | 1.0015 | 0.00412 | 0.710349 | 0.769545 | 0.9935 | 1.0097 | Stable | 0.002784 | 0.582533 | 0.649108 | 0.9961 | 1.007 | Stable | False | Poisson-HC1 | 3.77 |
| 7 | T7: Dental education | -0.007812 | 0.9922 | 0.002922 | 0.007514 | 0.01332 | 0.9866 | 0.9979 | Cold | 0.002924 | 0.007543 | 0.012257 | 0.9865 | 0.9979 | Cold | False | Poisson-HC1 | 3.092 |
| 8 | T8: Nutrition and public health | -0.040476 | 0.9603 | 0.004495 | 0.0 | 0.0 | 0.9519 | 0.9688 | Cold | 0.003317 | 0.0 | 0.0 | 0.9541 | 0.9666 | Cold | False | Poisson-HC1 | 4.295 |
| 9 | T9: Burnout and wellbeing | 0.024087 | 1.0244 | 0.005445 | 1e-05 | 2.8e-05 | 1.0135 | 1.0354 | Hot | 0.003301 | 0.0 | 0.0 | 1.0178 | 1.031 | Hot | False | Poisson-HC1 | 6.052 |
| 10 | T10: Interprofessional education | 0.015271 | 1.0154 | 0.007375 | 0.038399 | 0.062398 | 1.0008 | 1.0302 | Stable | 0.00466 | 0.001049 | 0.001948 | 1.0062 | 1.0247 | Hot | True | Poisson-HC1 | 9.3 |
| 11 | T11: Medical professionalism | -0.014264 | 0.9858 | 0.002249 | 0.0 | 0.0 | 0.9815 | 0.9902 | Cold | 0.001868 | 0.0 | 0.0 | 0.9822 | 0.9895 | Cold | False | Poisson-HC1 | 2.444 |
| 12 | T12: Diversity and equity | 0.039512 | 1.0403 | 0.009626 | 4e-05 | 9.6e-05 | 1.0209 | 1.0601 | Hot | 0.006529 | 0.0 | 0.0 | 1.0271 | 1.0537 | Hot | False | Poisson-HC1 | 11.353 |
| 13 | T13: Surgical residency programs | 0.022799 | 1.0231 | 0.002256 | 0.0 | 0.0 | 1.0185 | 1.0276 | Hot | 0.002502 | 0.0 | 0.0 | 1.0181 | 1.0281 | Hot | False | Poisson-HC1 | 1.532 |
| 14 | T14: Vaccination education | 0.035706 | 1.0364 | 0.004395 | 0.0 | 0.0 | 1.0275 | 1.0453 | Hot | 0.003772 | 0.0 | 0.0 | 1.0287 | 1.044 | Hot | False | Poisson-HC1 | 2.466 |
| 15 | T15: Feedback and residency training | 0.000525 | 1.0005 | 0.004869 | 0.914136 | 0.938192 | 0.991 | 1.0101 | Stable | 0.003429 | 0.878323 | 0.901437 | 0.9938 | 1.0073 | Stable | False | Poisson-HC1 | 4.773 |
| 16 | T16: AI and ChatGPT | 0.084457 | 1.0881 | 0.030102 | 0.00502 | 0.009789 | 1.0258 | 1.1543 | Hot | 0.026388 | 0.001371 | 0.002325 | 1.0333 | 1.1459 | Hot | False | Poisson-HC1 | 26.542 |
| 17 | T17: Palliative care and oncology | -0.01789 | 0.9823 | 0.004227 | 2.3e-05 | 6e-05 | 0.9742 | 0.9904 | Cold | 0.003612 | 1e-06 | 2e-06 | 0.9753 | 0.9892 | Cold | False | Poisson-HC1 | 1.752 |
| 18 | T18: Psychiatry and mental health | -0.042566 | 0.9583 | 0.002851 | 0.0 | 0.0 | 0.953 | 0.9637 | Cold | 0.002499 | 0.0 | 0.0 | 0.9536 | 0.963 | Cold | False | Poisson-HC1 | 1.898 |
| 19 | T19: Anatomy and dissection | 0.021137 | 1.0214 | 0.007028 | 0.002634 | 0.005407 | 1.0074 | 1.0355 | Hot | 0.006226 | 0.000686 | 0.001338 | 1.009 | 1.0339 | Hot | False | Poisson-HC1 | 4.452 |
| 20 | T20: Cultural competence and mentoring | -0.002067 | 0.9979 | 0.004057 | 0.6104 | 0.700165 | 0.99 | 1.0059 | Stable | 0.003095 | 0.504218 | 0.578368 | 0.9919 | 1.004 | Stable | False | Poisson-HC1 | 2.084 |
| 21 | T21: HIV and sexual health | -0.005327 | 0.9947 | 0.007385 | 0.470731 | 0.59221 | 0.9804 | 1.0092 | Stable | 0.005503 | 0.333067 | 0.41902 | 0.984 | 1.0055 | Stable | False | Poisson-HC1 | 3.472 |
| 22 | T22: Assessment and examination | 4.8e-05 | 1.0 | 0.00391 | 0.990256 | 0.990256 | 0.9924 | 1.0077 | Stable | 0.003348 | 0.98862 | 0.98862 | 0.9935 | 1.0066 | Stable | False | Poisson-HC1 | 3.345 |
| 23 | T23: Airway management | -0.034748 | 0.9658 | 0.005956 | 0.0 | 0.0 | 0.9546 | 0.9772 | Cold | 0.004243 | 0.0 | 0.0 | 0.9579 | 0.9739 | Cold | False | Poisson-HC1 | 2.089 |
| 24 | T24: Physical therapy education | 0.001958 | 1.002 | 0.003572 | 0.583648 | 0.689766 | 0.995 | 1.009 | Stable | 0.002851 | 0.492292 | 0.578368 | 0.9964 | 1.0076 | Stable | False | Poisson-HC1 | 1.544 |
| 25 | T25: Virtual reality simulation | 0.065411 | 1.0676 | 0.007114 | 0.0 | 0.0 | 1.0528 | 1.0826 | Hot | 0.004926 | 0.0 | 0.0 | 1.0573 | 1.078 | Hot | False | Poisson-HC1 | 4.095 |
| 26 | T26: Geriatrics and dementia | -0.036613 | 0.964 | 0.008262 | 9e-06 | 2.7e-05 | 0.9486 | 0.9798 | Cold | 0.006249 | 0.0 | 0.0 | 0.9523 | 0.9759 | Cold | False | Poisson-HC1 | 3.112 |
| 27 | T27: Veterinary education | -0.010369 | 0.9897 | 0.00846 | 0.220324 | 0.30688 | 0.9734 | 1.0062 | Stable | 0.006887 | 0.132189 | 0.18412 | 0.9764 | 1.0031 | Stable | False | Poisson-HC1 | 5.067 |
| 28 | T28: Antimicrobial stewardship | -0.001552 | 0.9984 | 0.004509 | 0.730632 | 0.770126 | 0.9897 | 1.0073 | Stable | 0.003786 | 0.681812 | 0.718667 | 0.9911 | 1.0059 | Stable | False | Poisson-HC1 | 1.557 |
| 29 | T29: Empathy and emotional intelligence | 0.068414 | 1.0708 | 0.006047 | 0.0 | 0.0 | 1.0582 | 1.0836 | Hot | 0.004498 | 0.0 | 0.0 | 1.0614 | 1.0803 | Hot | False | Poisson-HC1 | 1.853 |
| 30 | T30: Pain management and opioids | 0.001836 | 1.0018 | 0.004483 | 0.682174 | 0.760137 | 0.9931 | 1.0107 | Stable | 0.004215 | 0.663196 | 0.718462 | 0.9936 | 1.0101 | Stable | False | Poisson-HC1 | 2.086 |
| 31 | T31: Dermatology education | 0.006791 | 1.0068 | 0.007607 | 0.372007 | 0.500285 | 0.9919 | 1.0219 | Stable | 0.005885 | 0.248567 | 0.33428 | 0.9953 | 1.0185 | Stable | False | Poisson-HC1 | 1.731 |
| 32 | T32: Duty hours and work restrictions | -0.034398 | 0.9662 | 0.011047 | 0.001847 | 0.004002 | 0.9455 | 0.9873 | Cold | 0.007515 | 5e-06 | 1.1e-05 | 0.9521 | 0.9805 | Cold | False | Poisson-HC1 | 3.848 |
| 33 | T33: CAM and acupuncture | -0.088414 | 0.9154 | 0.004336 | 0.0 | 0.0 | 0.9076 | 0.9232 | Cold | 0.005404 | 0.0 | 0.0 | 0.9057 | 0.9251 | Cold | False | Poisson | 0.652 |
| 34 | T34: Climate change and health | 0.069406 | 1.0719 | 0.029963 | 0.020536 | 0.034822 | 1.0107 | 1.1367 | Hot | 0.021325 | 0.001135 | 0.002012 | 1.028 | 1.1176 | Hot | False | Poisson-HC1 | 5.102 |
| 35 | T35: Spirituality and religious care | -0.031035 | 0.9694 | 0.006102 | 0.0 | 0.0 | 0.9579 | 0.9811 | Cold | 0.007094 | 1.2e-05 | 2.6e-05 | 0.9561 | 0.983 | Cold | False | Poisson | 0.893 |
| 36 | T36: JAMA specialty journals | -0.02451 | 0.9758 | 0.015728 | 0.119147 | 0.17872 | 0.9462 | 1.0063 | Stable | 0.013427 | 0.06793 | 0.098121 | 0.9504 | 1.0018 | Stable | False | Poisson-HC1 | 3.108 |
| 37 | T37: Tuberculosis education | -0.058075 | 0.9436 | 0.005299 | 0.0 | 0.0 | 0.9338 | 0.9534 | Cold | 0.008615 | 0.0 | 0.0 | 0.9278 | 0.9596 | Cold | False | Poisson | 0.763 |
| 38 | T38: SE Asian medical education journals | -0.028423 | 0.972 | 0.039352 | 0.470128 | 0.59221 | 0.8998 | 1.0499 | Stable | 0.025962 | 0.273614 | 0.355698 | 0.9238 | 1.0227 | Stable | False | Poisson-HC1 | 11.986 |

## **Supplementary Table S12. S-curve lifecycle fits per topic (logistic parameters and lifecycle stage classification)**

| topic_id | K | r | t_mid | R2 | lifecycle_stage | label |
| --- | --- | --- | --- | --- | --- | --- |
| 0 | 1.20349 | 0.1917 | 2016.5 | 0.9978 | Mature | T0: General/Residual |
| 1 | 1.208214 | 0.2022 | 2016.8 | 0.9982 | Mature | T1: Surgical skills training |
| 2 | 1.5 | 0.1773 | 2020.9 | 0.9903 | Mature | T2: Student learning and pedagogy |
| 3 | 1.288068 | 0.1955 | 2018.0 | 0.9985 | Mature | T3: Simulation-based education |
| 4 | 1.244073 | 0.1933 | 2017.1 | 0.9986 | Mature | T4: Clinical imaging and ultrasound |
| 5 | 1.152947 | 0.19 | 2015.1 | 0.9973 | Mature | T5: Nursing education |
| 6 | 1.278341 | 0.1926 | 2017.8 | 0.9982 | Mature | T6: Pharmacy education |
| 7 | 1.271126 | 0.1818 | 2017.5 | 0.9979 | Mature | T7: Dental education |
| 8 | 1.118108 | 0.1958 | 2014.2 | 0.9964 | Saturated | T8: Nutrition and public health |
| 9 | 1.5 | 0.1767 | 2020.7 | 0.9956 | Mature | T9: Burnout and wellbeing |
| 10 | 1.266653 | 0.2121 | 2018.0 | 0.9994 | Mature | T10: Interprofessional education |
| 11 | 1.217023 | 0.1876 | 2016.6 | 0.9974 | Mature | T11: Medical professionalism |
| 12 | 1.5 | 0.1832 | 2021.2 | 0.9916 | Mature | T12: Diversity and equity |
| 13 | 1.5 | 0.1797 | 2020.5 | 0.9982 | Mature | T13: Surgical residency programs |
| 14 | 1.5 | 0.1827 | 2020.9 | 0.9959 | Mature | T14: Vaccination education |
| 15 | 1.388357 | 0.1786 | 2018.9 | 0.9993 | Mature | T15: Feedback and residency training |
| 16 | 1.5 | 0.1837 | 2022.8 | 0.9704 | Growing | T16: AI and ChatGPT |
| 17 | 1.315462 | 0.1653 | 2017.7 | 0.9962 | Mature | T17: Palliative care and oncology |
| 18 | 1.109669 | 0.1927 | 2014.0 | 0.9955 | Saturated | T18: Psychiatry and mental health |
| 19 | 1.409947 | 0.1965 | 2019.5 | 0.9987 | Mature | T19: Anatomy and dissection |
| 20 | 1.46361 | 0.1608 | 2019.7 | 0.9957 | Mature | T20: Cultural competence and mentoring |
| 21 | 1.5 | 0.1537 | 2020.0 | 0.996 | Mature | T21: HIV and sexual health |
| 22 | 1.290652 | 0.1917 | 2017.8 | 0.9988 | Mature | T22: Assessment and examination |
| 23 | 1.15119 | 0.1953 | 2014.9 | 0.9972 | Saturated | T23: Airway management |
| 24 | 1.424268 | 0.1754 | 2019.2 | 0.9986 | Mature | T24: Physical therapy education |
| 25 | 1.5 | 0.2048 | 2021.6 | 0.9928 | Mature | T25: Virtual reality simulation |
| 26 | 1.126787 | 0.1963 | 2014.5 | 0.9943 | Saturated | T26: Geriatrics and dementia |
| 27 | 1.335601 | 0.1689 | 2018.1 | 0.9902 | Mature | T27: Veterinary education |
| 28 | 1.395273 | 0.1767 | 2018.8 | 0.9982 | Mature | T28: Antimicrobial stewardship |
| 29 | 1.5 | 0.2264 | 2021.2 | 0.9996 | Mature | T29: Empathy and emotional intelligence |
| 30 | 1.5 | 0.1678 | 2019.9 | 0.9972 | Mature | T30: Pain management and opioids |
| 31 | 1.5 | 0.1631 | 2020.3 | 0.9975 | Mature | T31: Dermatology education |
| 32 | 1.082735 | 0.2193 | 2014.0 | 0.9963 | Saturated | T32: Duty hours and work restrictions |

## **Supplementary Table S13. Outlier reassignment threshold sensitivity (cosine similarity 0.3 to 0.7)**

| threshold | n_reassigned | n_remaining_outlier | outlier_pct | n_active_topics | is_current |
| --- | --- | --- | --- | --- | --- |
| 0.3 | 87896 | 2360 | 0.85 | 39 | False |
| 0.4 | 83548 | 6708 | 2.43 | 39 | False |
| 0.5 | 72051 | 18205 | 6.59 | 39 | True |
| 0.6 | 46953 | 43303 | 15.68 | 39 | False |
| 0.7 | 12686 | 77570 | 28.08 | 39 | False |

## **Supplementary Table S14. Robustness summary including quadrant-threshold sensitivity for the embedding-based positional map**

| Robustness Check | Metric | Value | Threshold/Reference | Interpretation | Source Table/Figure |
| --- | --- | --- | --- | --- | --- |
| BERTopic seed stability (5 seeds: 42/123/456/789/1024) | Mean pairwise Adjusted Rand Index (ARI) | 0.787 (SD 0.048) | Pre-specified threshold 0.70 | Topic structure reproducible across seeds | Methods (Parameter Tuning) + Supplementary Table S2 |
| BERTopic seed stability (5 seeds) | Mean pairwise Normalized Mutual Information (NMI) | Reported in Supp Table S2 | No formal threshold | High between-seed information overlap | Supplementary Table S2 |
| Outlier-reassignment cosine threshold sensitivity | Threshold range tested | 0.3-0.7 (primary 0.5) | Five values tested | Substantive 39-topic structure preserved across all five thresholds | Supplementary Table S8 |
| Outlier-reassignment cosine threshold sensitivity | Resulting outlier proportion range | 4-14% | Primary outlier proportion 7.0% | Outlier rate varies smoothly with threshold without changing topic count | Supplementary Table S8 |
| Topic 0 exclusion sensitivity | Number of remaining topics whose Hot/Cold/Stable classification changes | 3 of 38 | Pre-specified <5 topics | Substantive trend findings not driven by residual cluster | Supplementary Table S9 |
| 2024-cutoff sensitivity (vs including partial 2025) | Number of 39 topics whose classification changes | 3 of 39 | Pre-specified <5 topics | Primary trend findings stable to year-window definition | Supplementary Table S10 |
| Compound 2020-2022 ITS (vs separate COVID/USMLE/ChatGPT models) | Topics with significant level/slope shift in compound model | 29 of 39 (74%) | Auxiliary descriptive only | High but no individual-event attribution possible | Supplementary Table S7 + S12 |
| Mann-Kendall non-parametric trend confirmation | Concordance with Poisson GLM trend classification | Concordant on substantive direction | N/A | Provides non-parametric robustness for Hot/Cold/Stable | Methods + Supplementary Table S2 |
| Embedding-based positional map: quadrant-threshold sensitivity | Quadrant stability under median->mean split | 34 of 39 topics retain quadrant (87.2%) | Pre-specified >80% | Positional structure largely robust to threshold choice | Supplementary Table S13 (this table) |
| Embedding-based positional map: topics that flip quadrant under mean split | Number flipped | 5 | List below | Localized threshold-sensitive region near medians | Supplementary Table S13 (this table) |
|  |  |  |  |  |  |
| Flipped topic | Flip direction (median -> mean) |  |  |  |  |
| T5: Nursing education | Motor -> Basic/Transversal |  |  |  |  |
| T12: Diversity and equity | Niche -> Motor |  |  |  |  |
| T21: HIV and sexual health | Niche -> Motor |  |  |  |  |
| T28: Antimicrobial stewardship | Niche -> Emerging/Declining |  |  |  |  |
| T33: CAM and acupuncture | Emerging/Declining -> Basic/Transversal |  |  |  |  |
|  |  |  |  |  |  |
| Notes |  |  |  |  |  |
| All robustness checks were pre-specified in the Methods (Sensitivity and Robustness Analyses subsection). The seed-stability ARI threshold of 0.70 was set before model fitting on the basis of typical ARI values reported in BERTopic methodological literature. |  |  |  |  |  |
| Quadrant-flip directions reflect re-classification when the centrality and density splits are computed as the mean rather than the median; this affects only topics whose centrality or density values lie close to the split. |  |  |  |  |  |

## **Supplementary Table S15. Strategic migration (co-movement centrality and global density) by 8-year period**

| period | topic_id | doc_count | proportion | comovement_centrality | density_global |
| --- | --- | --- | --- | --- | --- |
| 2000-2008 | 0 | 4872 | 0.107228 | 0.2854 | 0.3812 |
| 2000-2008 | 1 | 2748 | 0.060481 | 0.4459 | 0.4012 |
| 2000-2008 | 2 | 2885 | 0.063496 | 0.4368 | 0.3612 |
| 2000-2008 | 3 | 2338 | 0.051457 | 0.439 | 0.3549 |
| 2000-2008 | 4 | 2338 | 0.051457 | 0.3421 | 0.406 |
| 2000-2008 | 5 | 3368 | 0.074126 | 0.3663 | 0.3343 |
| 2000-2008 | 6 | 1701 | 0.037437 | 0.3263 | 0.3302 |
| 2000-2008 | 7 | 1767 | 0.03889 | 0.2891 | 0.3542 |
| 2000-2008 | 8 | 2601 | 0.057245 | 0.2753 | 0.3592 |
| 2000-2008 | 9 | 1552 | 0.034158 | 0.3843 | 0.3166 |
| 2000-2008 | 10 | 1386 | 0.030504 | 0.4213 | 0.3228 |
| 2000-2008 | 11 | 2175 | 0.04787 | 0.1842 | 0.3642 |
| 2000-2008 | 12 | 1135 | 0.02498 | 0.3429 | 0.364 |
| 2000-2008 | 13 | 1217 | 0.026785 | 0.2889 | 0.3479 |
| 2000-2008 | 14 | 484 | 0.010652 | 0.3363 | 0.3283 |
| 2000-2008 | 15 | 1412 | 0.031077 | 0.4637 | 0.3496 |
| 2000-2008 | 16 | 342 | 0.007527 | 0.2285 | 0.3229 |
| 2000-2008 | 17 | 943 | 0.020754 | 0.3549 | 0.3227 |
| 2000-2008 | 18 | 1470 | 0.032353 | 0.2407 | 0.359 |
| 2000-2008 | 19 | 624 | 0.013734 | 0.4027 | 0.3111 |
| 2000-2008 | 20 | 770 | 0.016947 | 0.2475 | 0.3285 |
| 2000-2008 | 21 | 800 | 0.017607 | 0.3585 | 0.3474 |
| 2000-2008 | 22 | 1277 | 0.028105 | 0.2544 | 0.3647 |
| 2000-2008 | 23 | 715 | 0.015736 | 0.2757 | 0.3329 |
| 2000-2008 | 24 | 686 | 0.015098 | 0.3506 | 0.2933 |
| 2000-2008 | 25 | 434 | 0.009552 | 0.3091 | 0.349 |
| 2000-2008 | 26 | 612 | 0.013469 | 0.3497 | 0.3214 |
| 2000-2008 | 27 | 452 | 0.009948 | 0.4257 | 0.3482 |
| 2000-2008 | 28 | 416 | 0.009156 | 0.314 | 0.336 |
| 2000-2008 | 29 | 137 | 0.003015 | 0.3606 | 0.3171 |
| 2000-2008 | 30 | 405 | 0.008914 | 0.3064 | 0.3309 |
| 2000-2008 | 31 | 264 | 0.00581 | 0.3227 | 0.3455 |
| 2000-2008 | 32 | 386 | 0.008495 | 0.3339 | 0.309 |
| 2000-2008 | 33 | 301 | 0.006625 | 0.3439 | 0.2812 |
| 2000-2008 | 34 | 83 | 0.001827 | 0.2721 | 0.3084 |
| 2000-2008 | 35 | 129 | 0.002839 | 0.3349 | 0.3861 |
| 2000-2008 | 36 | 78 | 0.001717 | 0.286 | 0.2247 |
| 2000-2008 | 37 | 96 | 0.002113 | 0.2801 | 0.3311 |
| 2000-2008 | 38 | 37 | 0.000814 | 0.3661 | 0.2597 |
| 2009-2016 | 0 | 8726 | 0.109447 | 0.4413 | 0.3812 |
| 2009-2016 | 1 | 5358 | 0.067203 | 0.3618 | 0.4012 |
| 2009-2016 | 2 | 4778 | 0.059929 | 0.452 | 0.3612 |
| 2009-2016 | 3 | 4894 | 0.061384 | 0.402 | 0.3549 |
| 2009-2016 | 4 | 4348 | 0.054535 | 0.4928 | 0.406 |
| 2009-2016 | 5 | 4898 | 0.061434 | 0.4002 | 0.3343 |
| 2009-2016 | 6 | 3475 | 0.043586 | 0.3865 | 0.3302 |
| 2009-2016 | 7 | 3052 | 0.03828 | 0.3404 | 0.3542 |
| 2009-2016 | 8 | 3503 | 0.043937 | 0.5213 | 0.3592 |
| 2009-2016 | 9 | 2596 | 0.032561 | 0.3521 | 0.3166 |
| 2009-2016 | 10 | 3646 | 0.04573 | 0.5039 | 0.3228 |
| 2009-2016 | 11 | 3732 | 0.046809 | 0.4396 | 0.3642 |
| 2009-2016 | 12 | 1906 | 0.023906 | 0.2877 | 0.364 |
| 2009-2016 | 13 | 2468 | 0.030955 | 0.4795 | 0.3479 |
| 2009-2016 | 14 | 1053 | 0.013207 | 0.2692 | 0.3283 |
| 2009-2016 | 15 | 2752 | 0.034517 | 0.409 | 0.3496 |
| 2009-2016 | 16 | 654 | 0.008203 | 0.4061 | 0.3229 |
| 2009-2016 | 17 | 1230 | 0.015427 | 0.3836 | 0.3227 |
| 2009-2016 | 18 | 1893 | 0.023743 | 0.4717 | 0.359 |
| 2009-2016 | 19 | 1548 | 0.019416 | 0.3486 | 0.3111 |
| 2009-2016 | 20 | 1103 | 0.013835 | 0.2648 | 0.3285 |
| 2009-2016 | 21 | 1077 | 0.013508 | 0.2627 | 0.3474 |
| 2009-2016 | 22 | 2630 | 0.032987 | 0.3543 | 0.3647 |
| 2009-2016 | 23 | 1073 | 0.013458 | 0.41 | 0.3329 |
| 2009-2016 | 24 | 1197 | 0.015014 | 0.421 | 0.2933 |
| 2009-2016 | 25 | 1016 | 0.012743 | 0.4588 | 0.349 |
| 2009-2016 | 26 | 789 | 0.009896 | 0.3891 | 0.3214 |
| 2009-2016 | 27 | 575 | 0.007212 | 0.3885 | 0.3482 |
| 2009-2016 | 28 | 697 | 0.008742 | 0.302 | 0.336 |
| 2009-2016 | 29 | 504 | 0.006321 | 0.5012 | 0.3171 |
| 2009-2016 | 30 | 579 | 0.007262 | 0.329 | 0.3309 |
| 2009-2016 | 31 | 429 | 0.005381 | 0.5085 | 0.3455 |
| 2009-2016 | 32 | 633 | 0.007939 | 0.3945 | 0.309 |
| 2009-2016 | 33 | 257 | 0.003223 | 0.4501 | 0.2812 |
| 2009-2016 | 34 | 99 | 0.001242 | 0.2729 | 0.3084 |
| 2009-2016 | 35 | 124 | 0.001555 | 0.3811 | 0.3861 |
| 2009-2016 | 36 | 145 | 0.001819 | 0.2675 | 0.2247 |
| 2009-2016 | 37 | 97 | 0.001217 | 0.2388 | 0.3311 |
| 2009-2016 | 38 | 194 | 0.002433 | 0.4741 | 0.2597 |
| 2017-2025 | 0 | 11497 | 0.087296 | 0.4479 | 0.3812 |
| 2017-2025 | 1 | 7875 | 0.059795 | 0.5424 | 0.4012 |
| 2017-2025 | 2 | 11369 | 0.086324 | 0.4745 | 0.3612 |
| 2017-2025 | 3 | 8000 | 0.060744 | 0.545 | 0.3549 |
| 2017-2025 | 4 | 6261 | 0.04754 | 0.6141 | 0.406 |
| 2017-2025 | 5 | 5956 | 0.045224 | 0.5242 | 0.3343 |
| 2017-2025 | 6 | 5305 | 0.040281 | 0.6034 | 0.3302 |
| 2017-2025 | 7 | 4670 | 0.035459 | 0.303 | 0.3542 |
| 2017-2025 | 8 | 4025 | 0.030562 | 0.6023 | 0.3592 |
| 2017-2025 | 9 | 6253 | 0.047479 | 0.5378 | 0.3166 |
| 2017-2025 | 10 | 5755 | 0.043697 | 0.6705 | 0.3228 |
| 2017-2025 | 11 | 5011 | 0.038048 | 0.458 | 0.3642 |
| 2017-2025 | 12 | 5248 | 0.039848 | 0.5811 | 0.364 |
| 2017-2025 | 13 | 5017 | 0.038094 | 0.5953 | 0.3479 |
| 2017-2025 | 14 | 2334 | 0.017722 | 0.6374 | 0.3283 |
| 2017-2025 | 15 | 4333 | 0.0329 | 0.5778 | 0.3496 |
| 2017-2025 | 16 | 3186 | 0.024191 | 0.4551 | 0.3229 |
| 2017-2025 | 17 | 1984 | 0.015064 | 0.4052 | 0.3227 |
| 2017-2025 | 18 | 2149 | 0.016317 | 0.6071 | 0.359 |
| 2017-2025 | 19 | 2643 | 0.020068 | 0.3712 | 0.3111 |
| 2017-2025 | 20 | 2032 | 0.015429 | 0.3811 | 0.3285 |
| 2017-2025 | 21 | 2025 | 0.015376 | 0.362 | 0.3474 |
| 2017-2025 | 22 | 3795 | 0.028815 | 0.4885 | 0.3647 |
| 2017-2025 | 23 | 1286 | 0.009765 | 0.54 | 0.3329 |
| 2017-2025 | 24 | 2090 | 0.015869 | 0.5813 | 0.2933 |
| 2017-2025 | 25 | 3238 | 0.024586 | 0.6449 | 0.349 |
| 2017-2025 | 26 | 965 | 0.007327 | 0.6045 | 0.3214 |
| 2017-2025 | 27 | 1022 | 0.00776 | 0.2694 | 0.3482 |
| 2017-2025 | 28 | 1170 | 0.008884 | 0.5613 | 0.336 |
| 2017-2025 | 29 | 1356 | 0.010296 | 0.3005 | 0.3171 |
| 2017-2025 | 30 | 1126 | 0.00855 | 0.5527 | 0.3309 |
| 2017-2025 | 31 | 800 | 0.006074 | 0.4944 | 0.3455 |
| 2017-2025 | 32 | 637 | 0.004837 | 0.6255 | 0.309 |
| 2017-2025 | 33 | 206 | 0.001564 | 0.5967 | 0.2812 |
| 2017-2025 | 34 | 488 | 0.003705 | 0.5704 | 0.3084 |
| 2017-2025 | 35 | 226 | 0.001716 | 0.2852 | 0.3861 |
| 2017-2025 | 36 | 159 | 0.001207 | 0.5469 | 0.2247 |
| 2017-2025 | 37 | 108 | 0.00082 | 0.4345 | 0.3311 |
| 2017-2025 | 38 | 101 | 0.000767 | 0.4872 | 0.2597 |

## **Supplementary Table S16. ITS event-level summary (Hot/Cold/Stable transitions across reference periods)**

| Event | Year | Significant Topics (FDR<0.05 level or slope shift) | Pct of 39 topics | Modeling Note |
| --- | --- | --- | --- | --- |
| WFME Global Standards | 2003 | 26 | 67% | Temporally isolated reference point; auxiliary descriptive only |
| ACGME Milestones | 2013 | 25 | 64% | Temporally isolated reference point; auxiliary descriptive only |
| Compound 2020-2022 (COVID-19 + USMLE Step 1 P/F + ChatGPT) | 2020-2022 | 29 | 74% | Combined into single intervention due to overlapping post-event windows; auxiliary descriptive only |
|  |  |  |  |  |
| Notes |  |  |  |  |
| This is an auxiliary descriptive analysis. Widespread significance most likely reflects shared long-term secular trends and unmodeled serial autocorrelation rather than event-specific effects. |  |  |  |  |
| Individual 2020-2022 event ITS results (COVID/USMLE/ChatGPT separately) are confounded by temporal overlap and reported in Supplementary Table S5 only for transparency, not for substantive interpretation. |  |  |  |  |
| All 195 event-topic test combinations were jointly FDR-corrected. The HC1 robust standard errors used here address overdispersion but do not account for serial autocorrelation; more conservative approaches (e.g., Newey-West) were not implemented because these analyses were not used to support primary conclusions. |  |  |  |  |
| All ITS results in this study should be interpreted as temporal context for the trend classification rather than as evidence of event causation. |  |  |  |  |

# **Supplementary Figures**

## **Supplementary Figure S1**


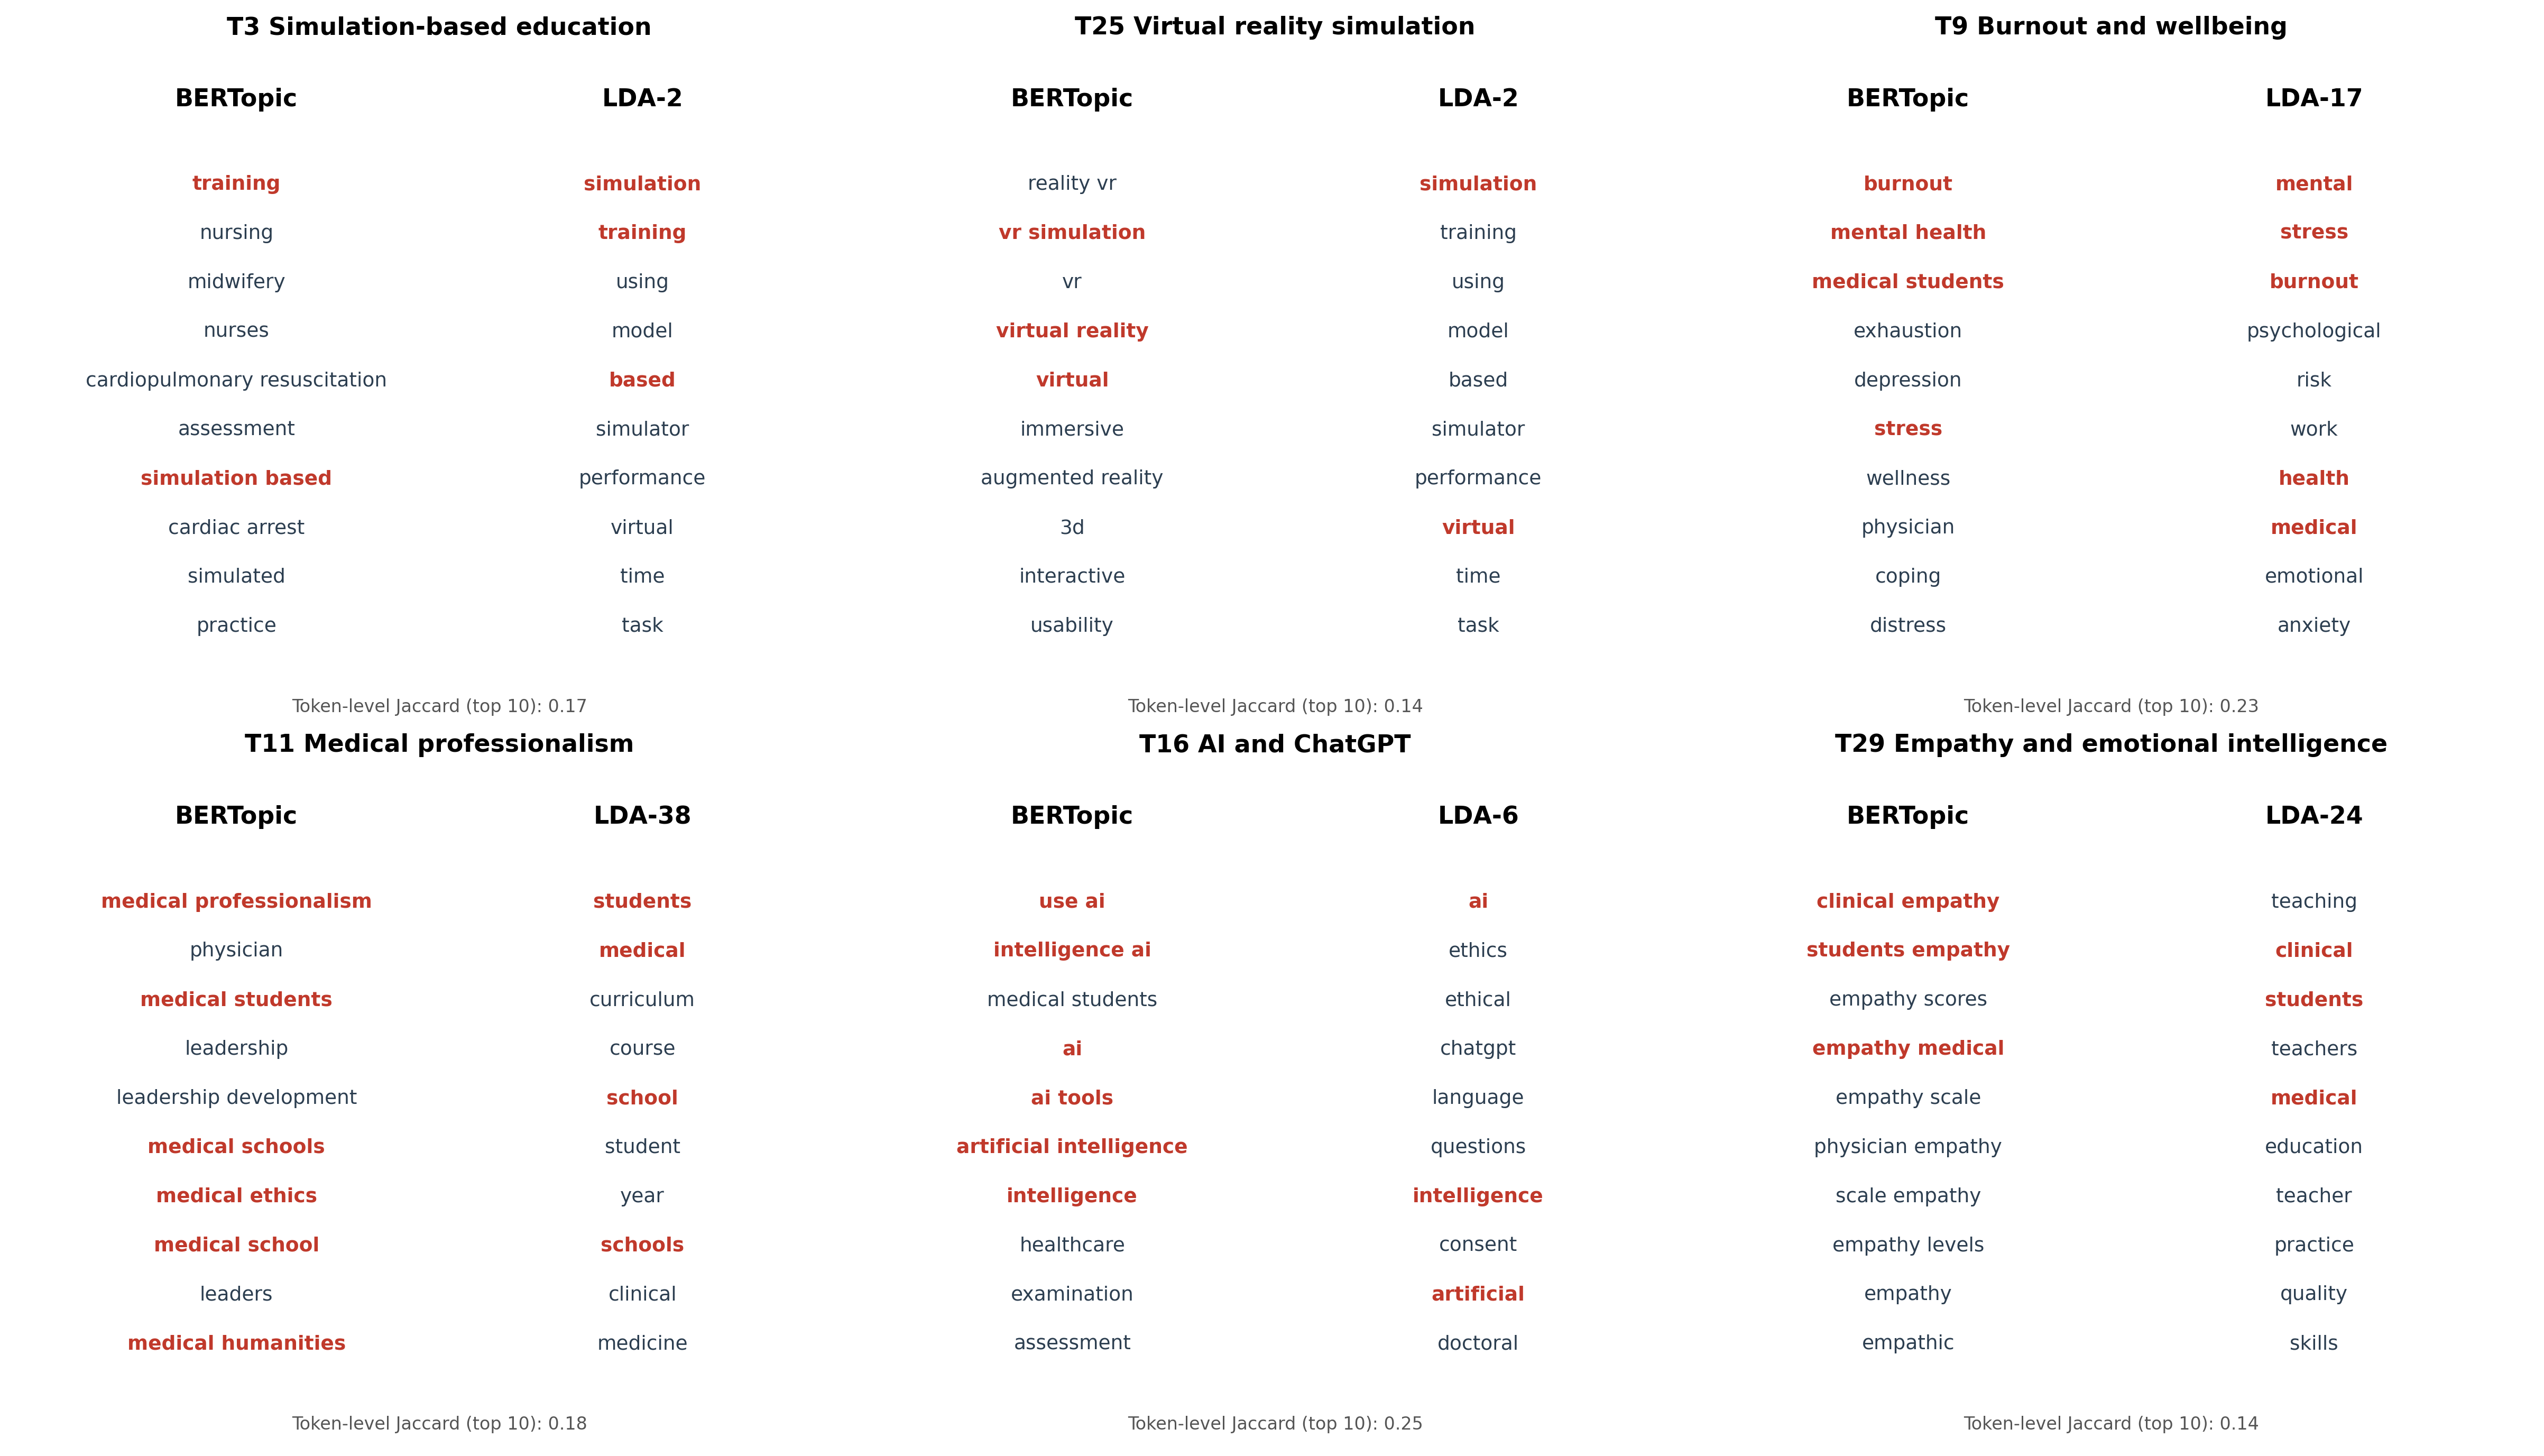


**Supplementary Figure S1.** Qualitative comparison of six representative BERTopic themes with their best-matching LDA counterparts, selected by token-level Jaccard overlap of the top-10 terms (overlap 0.14-0.25). In each panel the BERTopic keyword list (left) is shown beside the keyword list of the single best-matching LDA topic (right), and the value beneath each panel is the token-level Jaccard overlap of the two top-10 lists. Red bold text marks unigram tokens shared between the BERTopic and LDA keyword lists; a low Jaccard overlap and a small shared-token set indicate that the LDA bag-of-words representation distributes a theme’s vocabulary across a different cluster than BERTopic does. The six themes map to only five distinct LDA topics, with simulation-based education (T3) and virtual reality simulation (T25) both mapping to the same LDA topic, illustrating that the bag-of-words representation collapses semantically distinct themes that the embedding-based model separates. The comparison is descriptive and is not a claim of superiority of either method.

## **Supplementary Figure S2**


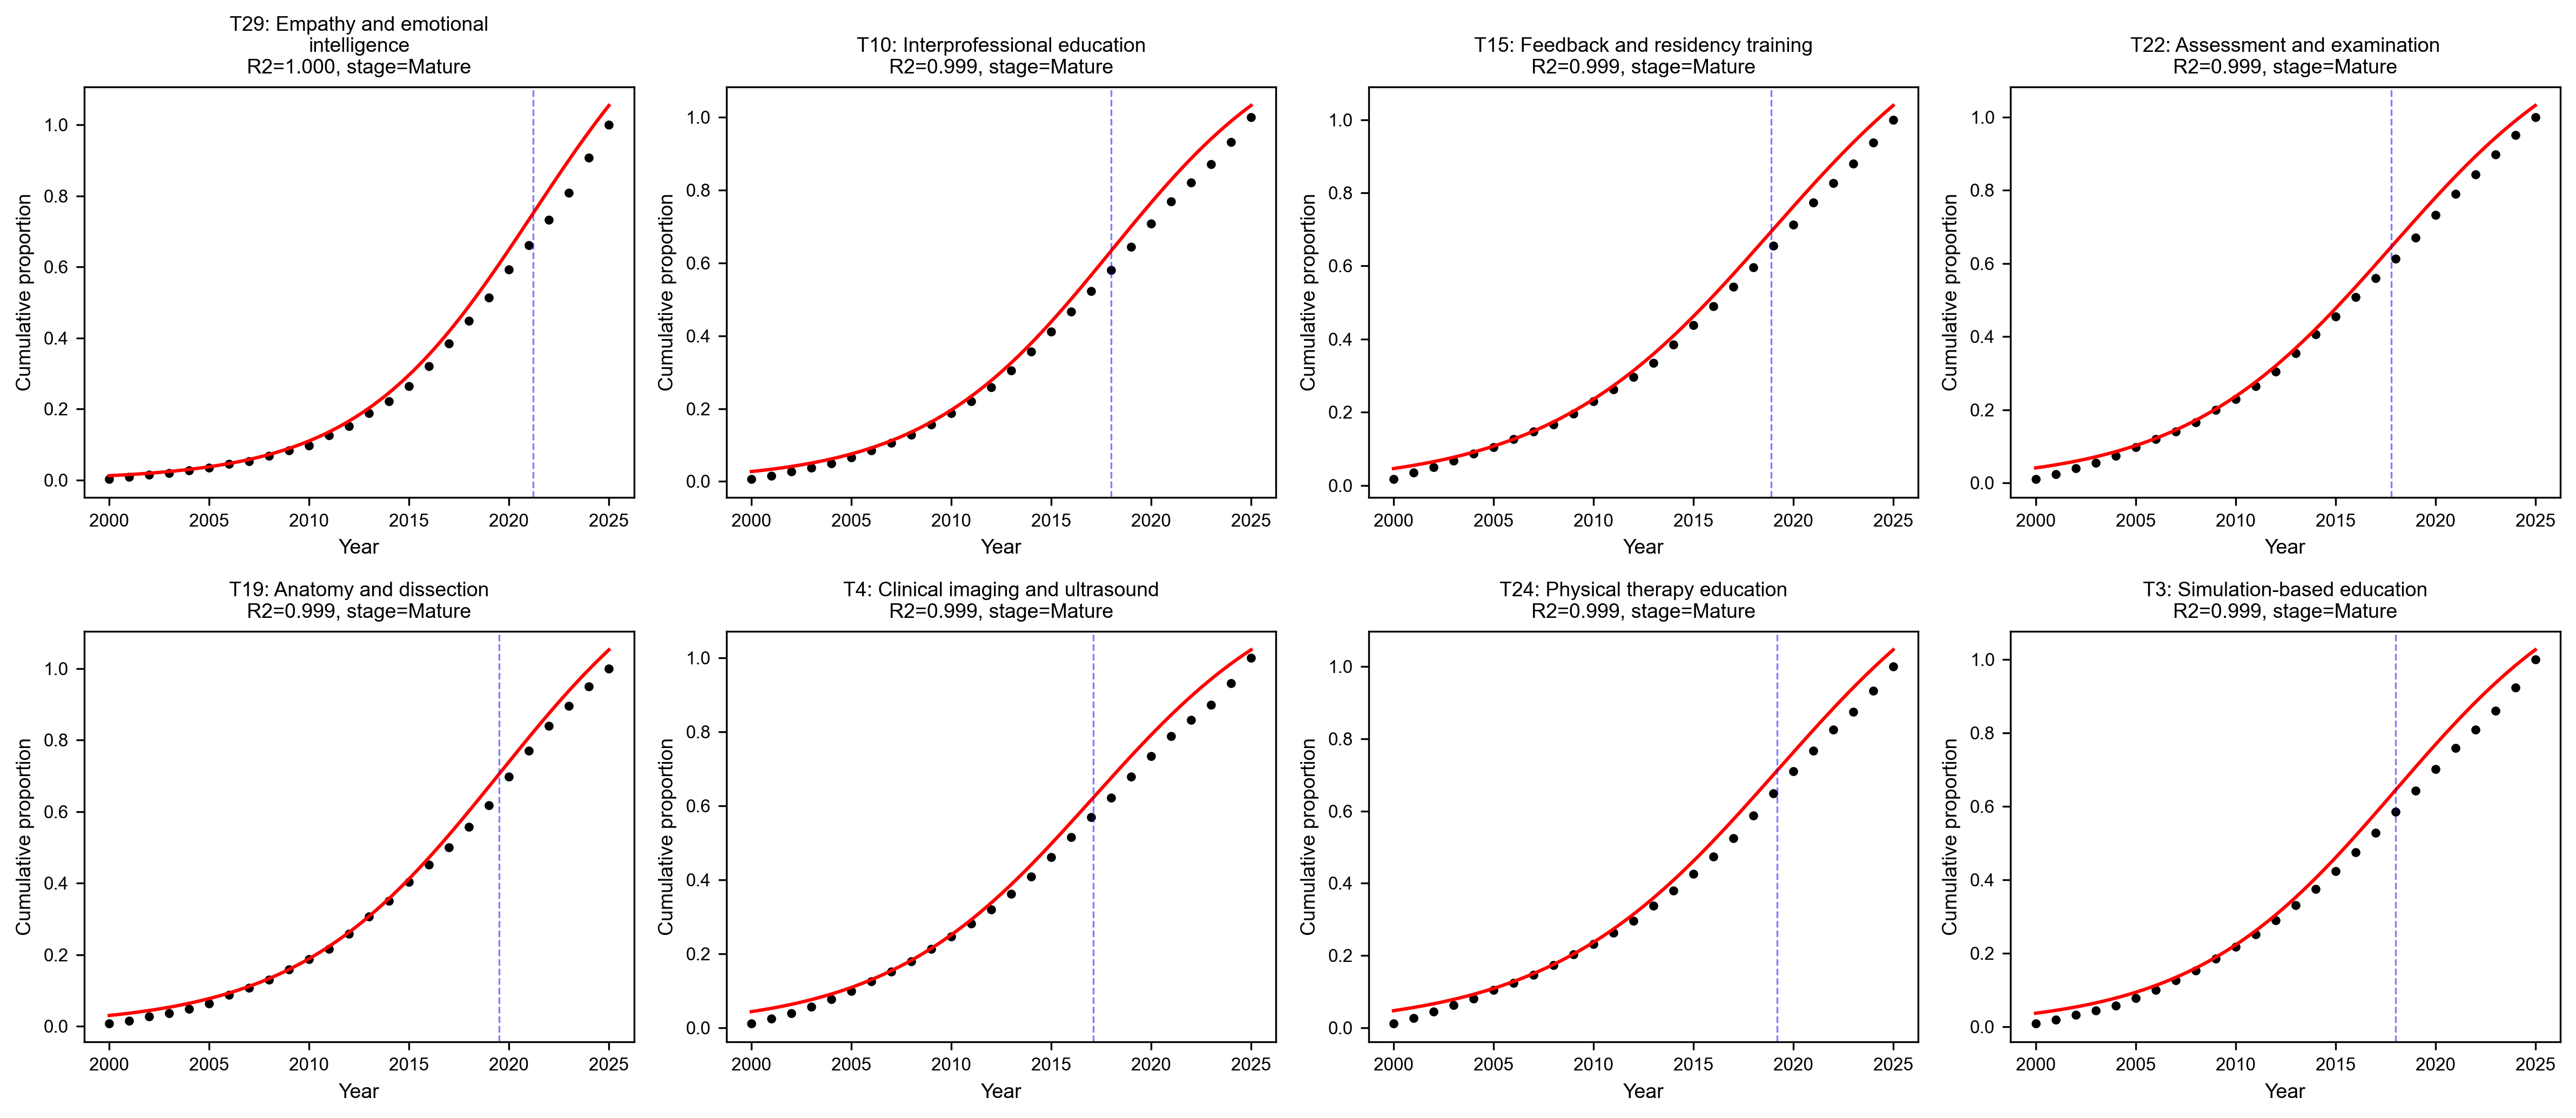


**Supplementary Figure S2.** Logistic S-curve lifecycle fits of normalized cumulative topic proportions for representative topics. Near-perfect fit statistics (R-squared ≥ 0.99 for many topics) largely reflect the mathematical property that cumulating any non-negative annual series yields smooth monotone curves that logistic functions fit well; these fits are reported as supplementary descriptive context only and should not be interpreted as evidence of lifecycle maturity (see Discussion).

## **Supplementary Figure S3**


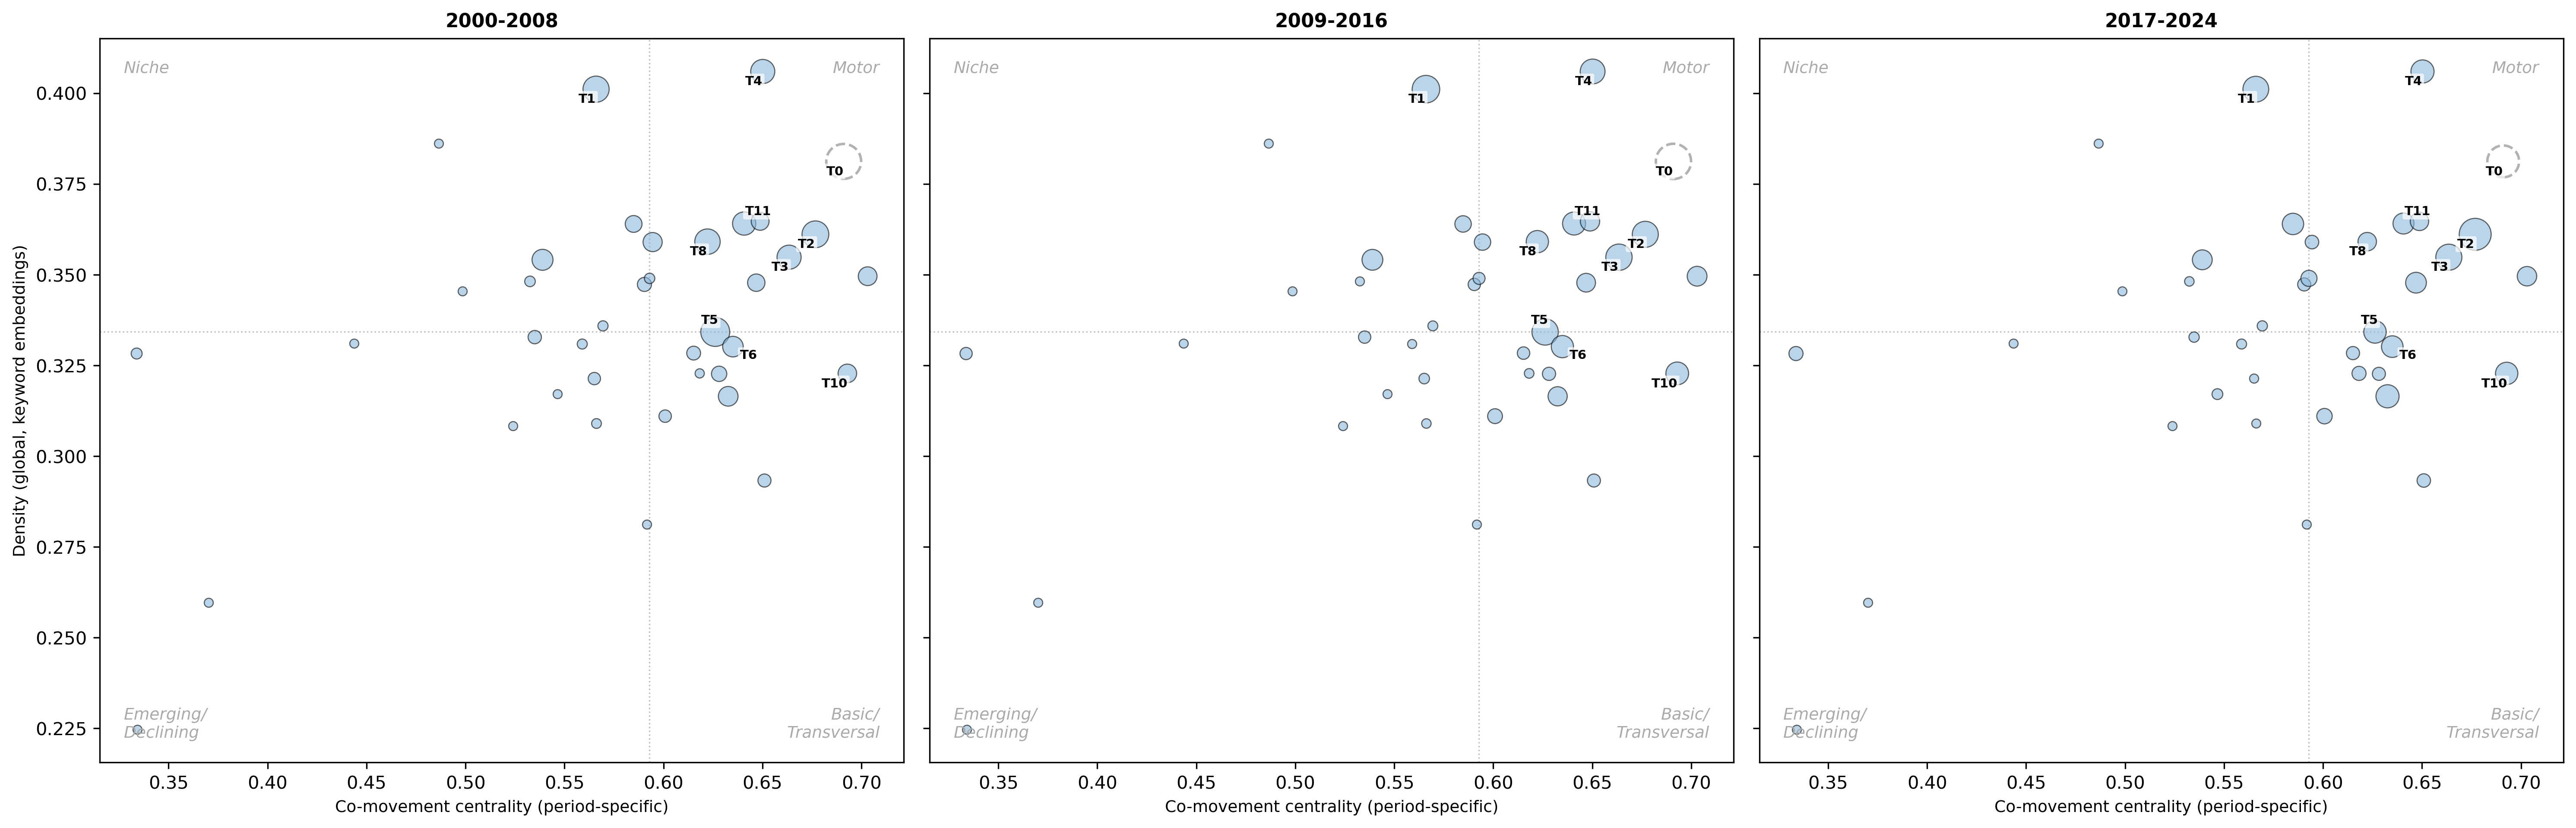


**Supplementary Figure S3.** Time-varying co-movement positional diagrams for three periods (2000-2008, 2009-2016, 2017-2024). Per-period centrality is the mean absolute Pearson correlation of a topic’s annual proportion vector with all other topics within the window; density is the global keyword-embedding density. Bubble size is proportional to within-period document share; the top-10 topics by total document count are annotated. Quadrant migration across periods is threshold-dependent and is not interpreted substantively.

## **Supplementary Figure S4**


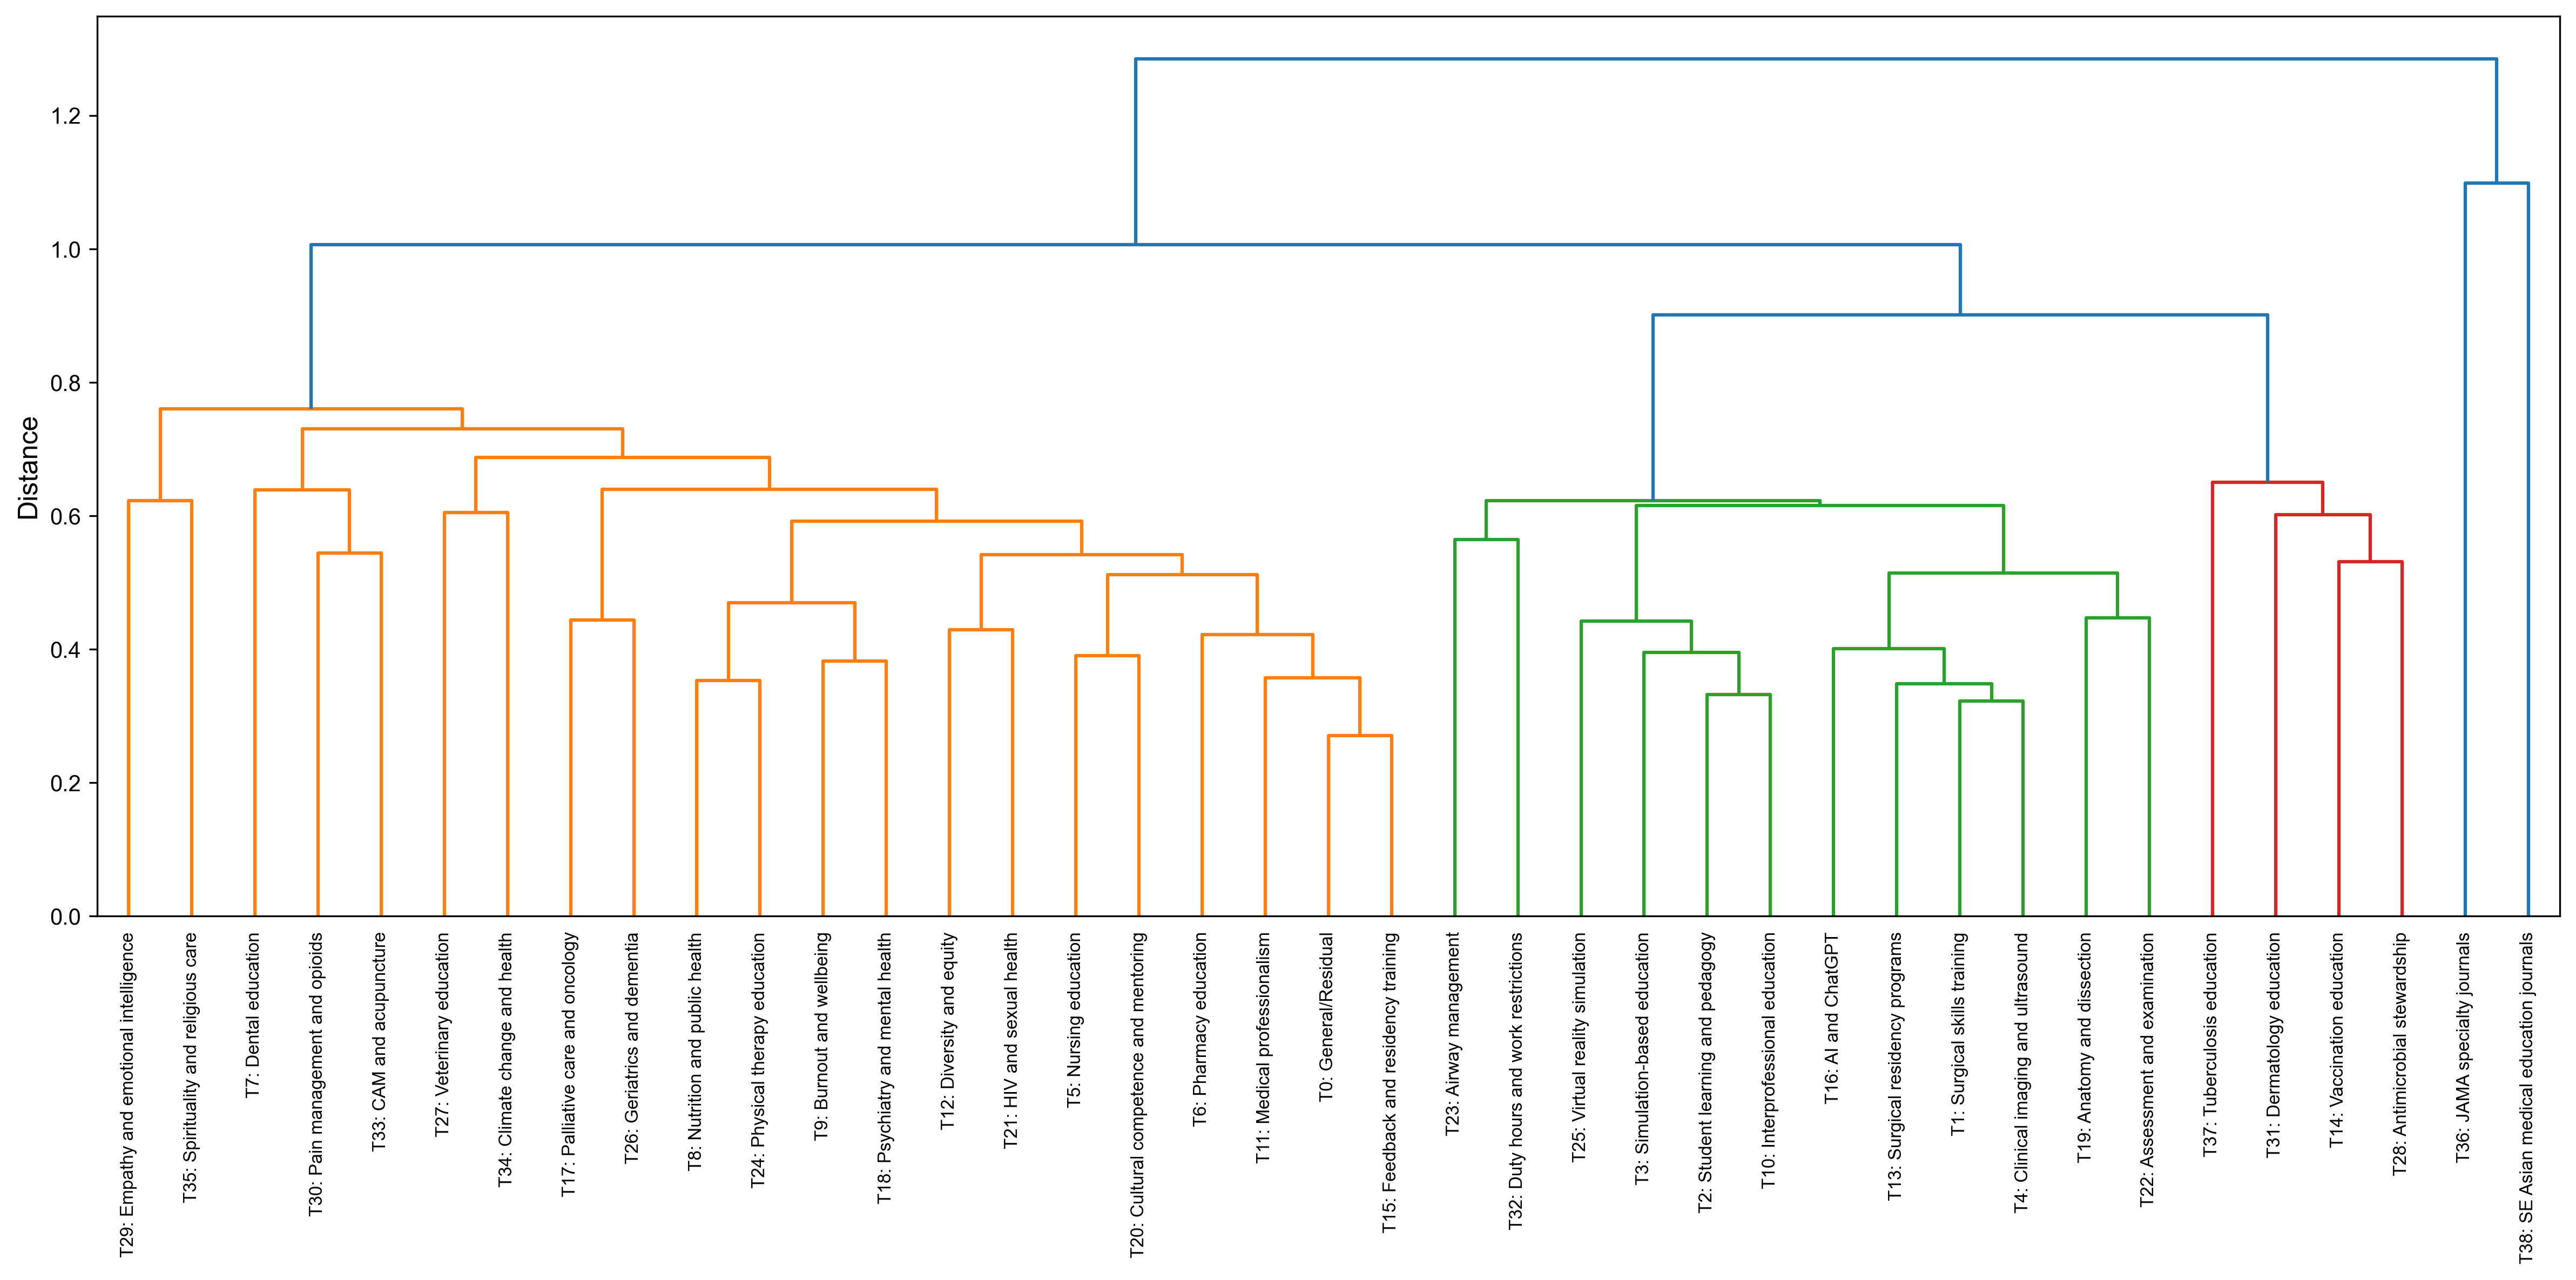


**Supplementary Figure S4.** Hierarchical clustering of the 39 BERTopic topic centroids using Ward linkage on Euclidean distance in the 384-dimensional embedding space. Three macro-clusters are evident: an orange cluster (n = 21 topics) covering general medical, professionalism, and clinical themes; a green cluster (n = 12 topics) covering technical training and pedagogy themes (including simulation, virtual reality, surgical skills, and anatomy); and two outlier clusters (red, n = 4: tuberculosis, dermatology, vaccination, and antimicrobial stewardship; blue, n = 2: JAMA-family and Southeast Asian medical-education journal-name artifacts). Topic 0 (residual cluster) is included for completeness. The dendrogram complements the two-dimensional UMAP projection in Figure 2 and the embedding-based positional map in Figure 4 of the main text.
